# Supplementary material for: Metal-free synthesis of substituted pyridines from aldehydes and NH4OAc under air
Source: Royal Society of Chemistry journal article supplement (doi:10.1039/c4ra10880a), 2014-01-01

## Supporting Information

### Metal-free Synthesis of Substituted Pyridines from aldehydes and NH<sub>4</sub>OAc under Air

**Rulong Yan,<sup>\*a</sup> Xiaoqiang Zhou,<sup>a</sup> Ming Li,<sup>b</sup> Xiaoni Li,<sup>a</sup> Xing Kang,<sup>a</sup> Xingxing Liu,<sup>a</sup> Xing Huo<sup>a</sup> and  
Guosheng Huang<sup>\*a</sup>**

*<sup>a</sup>State Key Laboratory of Applied Organic Chemistry, Key laboratory of Nonferrous Metal Chemistry and Resources Utilization of  
Gansu Province, Department of Chemistry, Lanzhou University, Lanzhou, P. R. China*

*E-mail: [yanrl@lzu.edu.cn](mailto:yanrl@lzu.edu.cn), [hgs@lzu.edu.cn](mailto:hgs@lzu.edu.cn); Fax: +86 931 8912596; Tel: +86 931 8912586*

*<sup>b</sup>Jinchuan Group Co., Ltd., Jinchuan, P. R. China*

#### Table of Contents

|                      |         |
|----------------------|---------|
| General Remarks      | S 2     |
| Experimental Section | S 2-14  |
| NMR Spectra          | S 15-64 |

## General remark

$^1\text{H}$  NMR and  $^{13}\text{C}$  NMR spectra were recorded on 400MHz and 100MHz in  $\text{CDCl}_3$ . All chemical shifts are given as  $\delta$  value (ppm) with reference to tetramethylsilane (TMS) as an internal standard. All compounds were further characterized by HRMS; copies of their  $^1\text{H}$  NMR and  $^{13}\text{C}$  NMR spectra are provided. Products were purified by flash chromatography on 200–300 mesh silica gels. All melting points were determined without correction. Unless otherwise noted, commercially available reagents and solvents were used without further purification.

## Experimental Section

### General procedure for the synthesis of the desired pyridines **3** and **4**.

An oven-dried tube was charged with 0.3 mmol of aldehydes **1**(**1''**), 0.9 mmol of  $\text{NH}_4\text{OAc}$  **2**,  $\text{NaHCO}_3$  (0.3 mmol) and 1 mL 1, 4-dioxane. Then the reaction was stirred at 90 °C under air and the reaction time was monitored by TLC. After cooling to room temperature, the solvent was diluted with 20 ml of ethyl acetate, washed with 10 ml of brine, and dried over anhydrous  $\text{Na}_2\text{SO}_4$ . Then the solvent was evaporated in vacuo, the residues were purified by column chromatography, eluting with petroleum ether/EtOAc to afford the desired pyridines.

### The detail experiment information of **3p**.

An oven-dried tube was charged with 0.3 mmol (40.2 mg) of 2-(p-tolyl)acetaldehyde **1b**, 0.3 mmol (45.0 mg) of 2-(4-methoxyphenyl)acetaldehyde **1g**, 0.9 mmol (69.3 mg) of  $\text{NH}_4\text{OAc}$  **2**, 0.3 mmol  $\text{NaHCO}_3$  (25.2 mg) and 2 mL 1, 4-dioxane. Then the reaction was stirred at 90 °C under air and the reaction time was monitored by TLC. After cooling to room temperature, the solvent was diluted with 20 ml of ethyl acetate, washed with 10 ml of brine, and dried over anhydrous  $\text{Na}_2\text{SO}_4$ . Then the

solvent was evaporated in vacuo, the residues were purified by column chromatography, eluting with petroleum ether/EtOAc to afford **3p** of 18.5 mg (34% yield), **3b** of 10.1 mg (26% yield) and **3g** of 13.8mg (32% yield).

#### The detail experiment information of **3q**.

An oven-dried tube was charged with 0.3 mmol (40.2 mg) of 2-(p-tolyl)acetaldehyde **1b**, 2-(3, 4-dimethoxyphenyl) acetaldehyde **1i**, 0.9 mmol (69.3 mg) of NH<sub>4</sub>OAc **2**, 0.3 mmol NaHCO<sub>3</sub> (25.2 mg) and 2 mL 1, 4-dioxane. Then the reaction was stirred at 90 °C under air and the reaction time was monitored by TLC. After cooling to room temperature, the solvent was diluted with 20 ml of ethyl acetate, washed with 10 ml of brine, and dried over anhydrous Na<sub>2</sub>SO<sub>4</sub>. Then the solvent was evaporated in vacuo, the residues were purified by column chromatography, eluting with petroleum ether/EtOAc to afford **3q** of 21.9 mg (36% yield), **3b** of 8.2 mg (21% yield) and **3g** of 16.4 mg (38% yield).

#### X-ray data for **3a**:

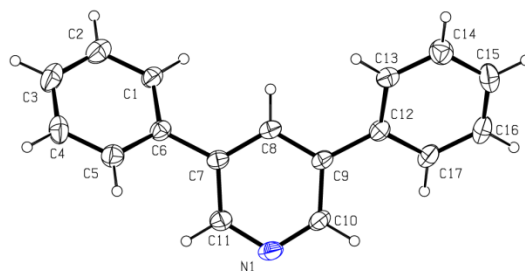

### 3,5-diphenylpyridine(3a)<sup>[1]</sup>

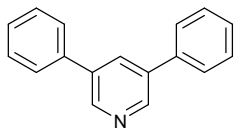

Yellow solid, melting point: 120-122 °C. <sup>1</sup>H NMR (400 MHz, CDCl<sub>3</sub>) δ 8.84 (s, 2H), 8.06 (t, *J* = 2.0 Hz, 1H), 7.66-7.64 (m, 4H), 7.53-7.42 (m, 6H). <sup>13</sup>C NMR (100 MHz, CDCl<sub>3</sub>) δ 146.86, 137.74, 136.72, 133.01, 129.13, 128.25, 127.27. HRMS calcd for C<sub>17</sub>H<sub>14</sub>N [M+H]<sup>+</sup> 232.1121, found 232.1126.

### 3,5-di-p-tolylpyridine(3b)<sup>[2]</sup>

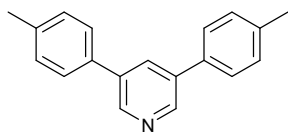

Yellow solid, melting point: 175-177 °C. <sup>1</sup>H NMR (400 MHz, CDCl<sub>3</sub>) δ 8.78 (d, *J* = 2.0 Hz, 2H), 8.00 (t, *J* = 2.0 Hz, 1H), 7.54 (d, *J* = 8.0 Hz, 4H), 7.31 (d, *J* = 8.0 Hz, 4H), 2.42 (s, 6H). <sup>13</sup>C NMR (100 MHz, CDCl<sub>3</sub>) δ 146.62, 138.11, 136.47, 134.94, 132.42, 129.81, 127.07, 21.16. HRMS calcd for C<sub>19</sub>H<sub>18</sub>N [M+H]<sup>+</sup> 260.1434, found 260.1436.

### 3,5-di-m-tolylpyridine(3c)<sup>[3]</sup>

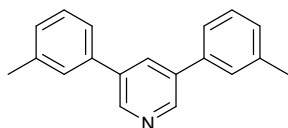

Yellow solid, melting point: 136-138 °C. <sup>1</sup>H NMR (400 MHz, CDCl<sub>3</sub>) δ 8.79 (d, *J* = 2.0 Hz, 2H), 8.02 (t, *J* = 2.0 Hz, 1H), 7.45-7.37 (m, 6H), 7.25-7.23 (m, 2H), 2.45 (s, 6H). <sup>13</sup>C NMR (100 MHz,

$\text{CDCl}_3$ )  $\delta$  146.92, 138.79, 137.79, 136.67, 132.88, 129.00, 128.92, 127.99, 124.35, 21.51. **HRMS**  
**calcd for**  $\text{C}_{19}\text{H}_{18}\text{N}$   $[\text{M}+\text{H}]^+$  260.1434, **found** 260.1437.

### 3,5-di-*o*-tolylpyridine(3d)<sup>[2]</sup>

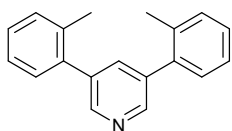

Yellow oil.  **$^1\text{H}$  NMR (400 MHz,  $\text{CDCl}_3$ )**  $\delta$  8.58 (d,  $J = 2.0$  Hz, 2H), 7.64 (t,  $J = 2.0$  Hz, 1H), 7.31-7.26 (m, 8H), 2.33 (s, 6H).  **$^{13}\text{C}$  NMR (100 MHz,  $\text{CDCl}_3$ )**  $\delta$  148.20, 137.89, 136.99, 136.71, 135.59, 130.59, 129.90, 128.13, 126.10, 20.42. **HRMS calcd for**  $\text{C}_{19}\text{H}_{18}\text{N}$   $[\text{M}+\text{H}]^+$  260.1434, **found** 260.1436.

### 3,5-bis(4-ethylphenyl)pyridine(3e)

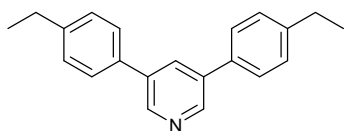

Yellow solid, melting point: 131-133 °C.  **$^1\text{H}$  NMR (400 MHz,  $\text{CDCl}_3$ )**  $\delta$  8.78 (d,  $J = 2.0$  Hz, 2H), 8.02 (t,  $J = 2.0$  Hz, 1H), 7.56 (d,  $J = 8.4$  Hz, 4H), 7.33 (d,  $J = 8.4$  Hz, 4H), 2.72 (q,  $J = 7.6$  Hz, 4H), 1.29 (t,  $J = 7.6$  Hz, 6H).  **$^{13}\text{C}$  NMR (100 MHz,  $\text{CDCl}_3$ )**  $\delta$  146.63, 144.45, 136.50, 135.20, 132.49, 128.63, 127.16, 28.56, 15.51. **HRMS calcd for**  $\text{C}_{21}\text{H}_{22}\text{N}$   $[\text{M}+\text{H}]^+$  288.1747, **found** 288.1744.

### 3,5-bis(3,4-dimethylphenyl)pyridine(3f)

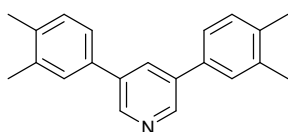

Yellow solid, melting point: 144-146 °C. **<sup>1</sup>H NMR (400 MHz, CDCl<sub>3</sub>)** δ 8.76 (d, *J* = 2.0 Hz, 2H), 8.00 (t, *J* = 2.0 Hz, 1H), 7.41-7.36 (m, 4H), 7.26-7.24 (m, 2H), 2.36-2.33 (d, 12H). **<sup>13</sup>C NMR (100 MHz, CDCl<sub>3</sub>)** δ 146.54, 137.34, 136.72, 136.52, 135.43, 132.43, 130.34, 128.41, 124.57, 19.90, 19.47. **HRMS calcd for C<sub>21</sub>H<sub>22</sub>N [M+H]<sup>+</sup> 288.1747, found 288.1749.**

### 3,5-bis(4-methoxyphenyl)pyridine(3g)<sup>[4]</sup>

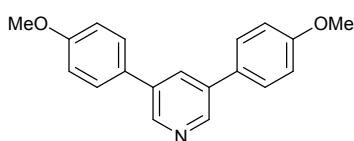

Yellow solid, melting point: 60-62 °C. **<sup>1</sup>H NMR (400 MHz, CDCl<sub>3</sub>)** δ 8.73 (d, *J* = 2.0 Hz, 2H), 7.96 (t, *J* = 2.0 Hz, 1H), 7.59-7.56 (m, 4H), 7.04-7.02 (m, 4H), 3.87 (s, 6H). **<sup>13</sup>C NMR (100 MHz, CDCl<sub>3</sub>)** δ 159.82, 146.08, 136.15, 131.92, 130.27, 128.31, 114.57, 55.34. **HRMS calcd for C<sub>19</sub>H<sub>18</sub>NO<sub>2</sub> [M+H]<sup>+</sup> 292.1332, found 292.1337.**

### 3,5-bis(3-methoxyphenyl)pyridine(3h)<sup>[4]</sup>

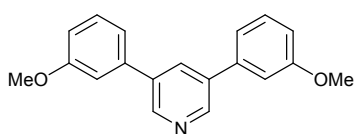

Yellow solid, melting point: 108-110 °C. **<sup>1</sup>H NMR (400 MHz, CDCl<sub>3</sub>)** δ 8.80 (d, *J* = 2.0 Hz, 2H), 8.03 (t, *J* = 2.0 Hz, 1H), 7.44-7.40 (m, 2H), 7.26-7.16 (m, 4H), 6.98-6.96 (m, 2H), 3.88 (s, 6H). **<sup>13</sup>C NMR (100 MHz, CDCl<sub>3</sub>)** δ 160.15, 147.12, 139.17, 136.47, 132.95, 130.16, 119.67, 113.54, 113.03, 55.37. **HRMS calcd for C<sub>19</sub>H<sub>18</sub>NO<sub>2</sub> [M+H]<sup>+</sup> 292.1332, found 292.1335.**

### 3,5-bis(3,4-dimethoxyphenyl)pyridine(3i)

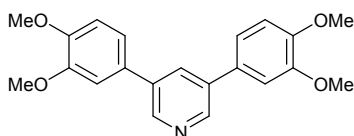

Yellow solid, melting point: 141-143 °C. <sup>1</sup>H NMR (400 MHz, CDCl<sub>3</sub>) δ 8.75 (d, *J* = 2.0 Hz, 2H), 7.96 (t, *J* = 2.0 Hz, 1H), 7.20 (dd, *J* = 8.0 Hz, 1.6 Hz, 2H), 7.13 (d, *J* = 1.6 Hz, 2H), 7.00 (d, *J* = 8.0 Hz, 2H), 3.97-3.95 (d, 12H). <sup>13</sup>C NMR (100 MHz, CDCl<sub>3</sub>) δ 149.45, 149.32, 146.34, 136.39, 132.16, 130.63, 119.70, 111.67, 110.38, 56.02, 55.97. HRMS calcd for C<sub>21</sub>H<sub>22</sub>NO<sub>4</sub> [M+H]<sup>+</sup> 352.1544, found 352.1547.

### 3,5-bis(3,4,5-trimethoxyphenyl)pyridine(3j)

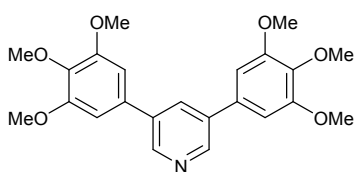

Yellow solid, melting point: 228-230 °C. <sup>1</sup>H NMR (400 MHz, CDCl<sub>3</sub>) δ 8.77 (d, *J* = 2.0 Hz, 2H), 7.95 (t, *J* = 2.0 Hz, 1H), 6.81 (s, 4H), 3.95 (s, 12H), 3.92 (s, 6H). <sup>13</sup>C NMR (100 MHz, CDCl<sub>3</sub>) δ 153.77, 146.90, 138.41, 136.84, 133.52, 132.78, 104.66, 60.94, 56.30. HRMS calcd for C<sub>23</sub>H<sub>26</sub>NO<sub>4</sub> [M+H]<sup>+</sup> 412.1755, found 412.1757.

### 3,5-bis(4-fluorophenyl)pyridine(3k)

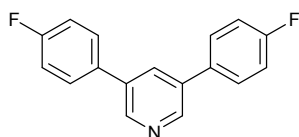

Yellow solid, melting point: 174-176 °C. <sup>1</sup>H NMR (400 MHz, CDCl<sub>3</sub>) δ 8.77 (d, *J* = 2.0 Hz, 2H), 7.95 (t, *J* = 2.0 Hz, 1H), 7.62-7.58 (m, 4H), 7.22-7.18 (m, 4H),. <sup>13</sup>C NMR (100 MHz, CDCl<sub>3</sub>) δ 163.02 (d, *J* = 247 Hz), 146.84, 135.73, 133.75 (d, *J* = 3 Hz), 132.58, 128.92 (d, *J* = 9 Hz), 116.15 (d,

$J = 21$  Hz). **HRMS calcd for  $C_{17}H_{12}F_2N$   $[M+H]^+$  268.0933, found 268.0931.**

### 3,5-bis(2-fluorophenyl)pyridine(3l)

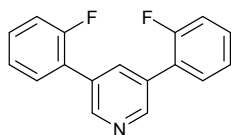

Yellow solid, melting point: 88-90 °C.  **$^1H$  NMR (400 MHz,  $CDCl_3$ )**  $\delta$  8.79 (t,  $J = 1.6$  Hz, 2H), 8.06 (t,  $J = 1.6$  Hz, 1H), 7.52-7.37 (m, 4H), 7.29-7.19 (m, 4H).  **$^{13}C$  NMR (100 MHz,  $CDCl_3$ )**  $\delta$  159.92 (d,  $J = 247$  Hz), 148.58 (d,  $J = 3$  Hz), 136.58 (d,  $J = 3$  Hz), 131.35, 130.58 (d,  $J = 3$  Hz), 130.10 (d,  $J = 9$  Hz), 125.40 (d,  $J = 13$  Hz), 124.72 (d,  $J = 3$  Hz), 116.34 (d,  $J = 23$  Hz). **HRMS calcd for  $C_{17}H_{12}F_2N$   $[M+H]^+$  268.0933, found 268.0930.**

### 3,5-di(naphthalen-1-yl)pyridine(3m)

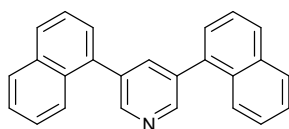

Yellow oil.  **$^1H$  NMR (400 MHz,  $CDCl_3$ )**  $\delta$  8.84 (d,  $J = 2.0$  Hz, 2H), 7.99-7.91 (m, 7H), 7.59-7.47 (m, 8H).  **$^{13}C$  NMR (100 MHz,  $CDCl_3$ )**  $\delta$  149.36, 138.62, 136.07, 135.91, 133.85, 131.46, 128.64, 128.53, 127.56, 126.64, 126.13, 125.42, 125.26. **HRMS calcd for  $C_{25}H_{18}N$   $[M+H]^+$  332.1434, found 332.1437.**

### 3,5-bis(benzo[d][1,3]dioxol-5-yl)pyridine(3n)

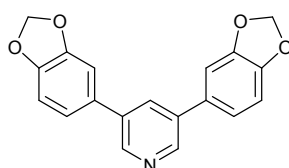



Yellow oil.  $^1\text{H NMR}$  (400 MHz,  $\text{CDCl}_3$ )  $\delta$  8.71 (s, 2H), 7.89 (t,  $J = 2.0$  Hz, 1H), 7.11-7.08 (m, 4H), 6.94-6.92 (m, 2H), 6.03 (s, 4H).  $^{13}\text{C NMR}$  (100 MHz,  $\text{CDCl}_3$ )  $\delta$  148.46, 147.87, 146.34, 132.25, 131.87, 120.95, 108.91, 107.59, 101.38. **HRMS calcd for  $\text{C}_{19}\text{H}_{14}\text{NO}_4$   $[\text{M}+\text{H}]^+$  320.0918, found 320.0922.**

### 3,5-di(furan-2-yl)pyridine(3o)

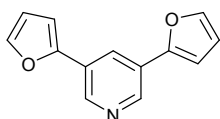

Yellow oil.  $^1\text{H NMR}$  (400 MHz,  $\text{CDCl}_3$ )  $\delta$  8.80 (d,  $J = 2.0$  Hz, 2H), 8.18 (t,  $J = 2.0$  Hz, 1H), 7.55 (d,  $J = 1.6$  Hz, 2H), 6.80 (d,  $J = 3.2$  Hz, 2H), 6.53 (dd,  $J = 3.2$  Hz, 1.6 Hz, 2H).  $^{13}\text{C NMR}$  (100 MHz,  $\text{CDCl}_3$ )  $\delta$  150.83, 143.75, 143.14, 126.73, 125.38, 111.89, 106.80. **HRMS calcd for  $\text{C}_{13}\text{H}_{10}\text{NO}_2$   $[\text{M}+\text{H}]^+$  212.0706, found 212.0710.**

### 3-(4-methoxyphenyl)-5-(p-tolyl)pyridine(3p)

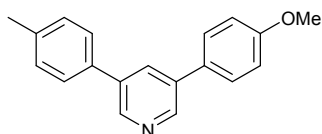

Yellow solid, melting point: 167-169 °C.  $^1\text{H NMR}$  (400 MHz,  $\text{CDCl}_3$ )  $\delta$  8.75 (d,  $J = 2.0$  Hz, 2H), 7.98 (t,  $J = 2.0$  Hz, 1H), 7.58-7.52 (m, 4H), 7.31-7.29 (m, 2H), 7.04-7.02 (m, 2H) 3.87 (s, 3H), 2.42 (s, 3H).  $^{13}\text{C NMR}$  (100 MHz,  $\text{CDCl}_3$ )  $\delta$  159.81, 146.37, 146.26, 138.09, 136.45, 136.15, 134.94, 132.16, 130.22, 129.80, 128.30, 127.05, 114.56, 53.37, 21.14. **HRMS calcd for  $\text{C}_{19}\text{H}_{18}\text{NO}$   $[\text{M}+\text{H}]^+$  276.1383, found 276.1385.**

### 3-(3,4-dimethoxyphenyl)-5-(p-tolyl)pyridine(3q)

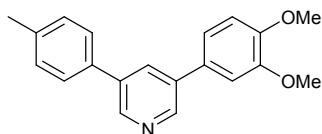

Yellow solid, melting point: 179-181 °C. **<sup>1</sup>H NMR (400 MHz, CDCl<sub>3</sub>)** δ 8.76 (d, *J* = 2.0 Hz, 2H), 7.98 (t, *J* = 2.0 Hz, 1H), 7.54 (d, *J* = 8.0 Hz, 2H), 7.31 (d, *J* = 8.0 Hz, 2H), 7.20 (dd, *J* = 8.4 Hz, 2.0 Hz, 1H), 7.13 (d, *J* = 2.0 Hz, 1H), 7.00 (d, *J* = 8.4 Hz, 1H), 3.97 (s, 3H), 3.95 (s, 3H), 2.43 (s, 3H). **<sup>13</sup>C NMR (100 MHz, CDCl<sub>3</sub>)** δ 149.53, 149.38, 146.51, 146.46, 138.16, 136.52, 136.44, 134.95, 132.34, 130.72, 129.83, 127.10, 119.73, 111.77, 110.45, 56.07, 56.04, 21.15. **HRMS calcd for C<sub>20</sub>H<sub>20</sub>NO<sub>2</sub> [M+H]<sup>+</sup> 306.1489, found 306.1493.**

### 2-benzyl-3,5-diphenylpyridine (3aa).

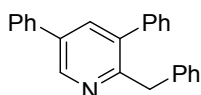

Yellow oil. **<sup>1</sup>H NMR (400 MHz, CDCl<sub>3</sub>)** δ 8.84-8.83 (d, *J* = 2.4 Hz, 1H), 7.75-7.74 (d, *J* = 2.4 Hz, 1H), 7.62-7.59 (m, 2H), 7.48-7.38 (m, 6H), 7.29-7.27 (m, 2H), 7.20-7.13 (m, 3H), 7.06-7.04 (m, 2H), 4.19 (s, 2H). **<sup>13</sup>C NMR (100 MHz, CDCl<sub>3</sub>)** δ 156.6, 146.7, 140.0, 139.5, 137.5, 137.3, 136.1, 134.2, 129.2, 129.0, 128.8, 128.3, 128.2, 127.9, 127.6, 127.0, 125.9, 41.3. **HRMS calcd for C<sub>24</sub>H<sub>20</sub>N [M+H]<sup>+</sup> 322.1590, found 322.1596.**

### 3,5-dibenzyl-2-phenethylpyridine(4a)

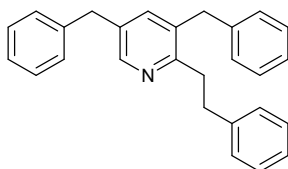

Yellow oil. **<sup>1</sup>H NMR (400 MHz, CDCl<sub>3</sub>)** δ 8.36 (d, *J* = 2.0 Hz, 1H), 7.31-7.01 (m, 16H), 3.93 (s, 2H), 3.86 (s, 2H), 3.02-2.98 (m, 2H), 2.91-2.86 (m, 2H). **<sup>13</sup>C NMR (100 MHz, CDCl<sub>3</sub>)** δ 157.62, 147.68, 141.97, 140.12, 139.57, 138.40, 133.97, 133.49, 128.74, 128.62, 128.59, 128.56, 128.45,

128.30, 126.33, 125.85, 38.60, 38.28, 36.82, 35.46. **HRMS calcd for** C<sub>27</sub>H<sub>26</sub>N [M+H]<sup>+</sup> 364.2060, **found** 364.2064.

**3,5-bis(4-methylbenzyl)-2-(4-methylphenethyl)pyridine (4b).**

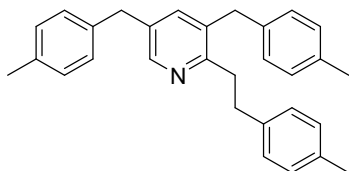

Yellow oil (20.2 mg, 50%). <sup>1</sup>H NMR(400 MHz, CDCl<sub>3</sub>) δ 8.34-8.33 (d, *J* = 2.0 Hz, 1H), 7.17-7.16 (d, *J* = 2.0 Hz, 1H), 7.11-6.99 (m, 10 H), 6.91-6.89 (m, 2 H), 3.88 (s, 2 H), 3.83 (s, 2H), 2.99-2.95 (m, 2 H), 2.86-2.82 (m, 2H), 2.32 (s, 3 H), 2.31 (s, 6 H). <sup>13</sup>C NMR (100 MHz, CDCl<sub>3</sub>) δ 157.6, 147.6, 139.0, 138.3, 137.1, 136.5, 135.83, 135.79, 135.3, 134.1, 133.7, 129.3, 129.2, 129.0, 128.6, 128.5, 128.3, 38.2, 37.9, 37.0, 35.1, 21.0. **HRMS calcd for** C<sub>30</sub>H<sub>32</sub>N[M+H]<sup>+</sup> 406.2530, **found** 406.2534.

**3,5-bis(4-ethylbenzyl)-2-(4-ethylphenethyl)pyridine(4c).**

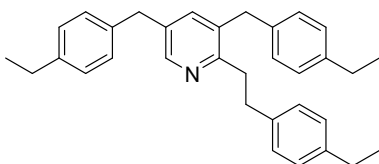

Yellow oil (24.1 mg, 54%). <sup>1</sup>H NMR(400 MHz, CDCl<sub>3</sub>) δ 8.35-8.34 (d, *J* = 2.0 Hz, 1H), 7.19-7.18 (d, *J* = 2.0 Hz, 1H), 7.13-7.06 (m, 8 H), 7.03-7.01 (m, 2 H), 6.95-6.93 (m, 2 H) 3.89 (s, 2 H), 3.84 (s, 2 H), 3.00-2.96 (m, 2 H), 2.86-2.82 (m, 2H), 2.65-2.58 (m, 6 H), 1.24-1.19 (m, 9 H). <sup>13</sup>C NMR (100 MHz, CDCl<sub>3</sub>) δ 157.7, 147.6, 142.2, 141.7, 139.2, 138.4, 137.4, 136.8, 134.1, 133.6, 128.65, 128.57, 128.4, 128.06, 128.01, 127.8, 38.2, 37.9, 37.0, 35.1, 28.4, 15.63, 15.61. **HRMS calcd for** C<sub>33</sub>H<sub>38</sub>N[M+H]<sup>+</sup> 448.2999, **found** 448.2996.

**3,5-bis(3,4-dimethylbenzyl)-2-(3,4-dimethylphenethyl)pyridine(4d).**

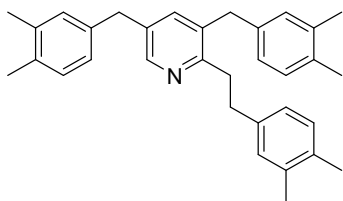

Yellow oil (22.8 mg, 51%).  $^1\text{H NMR}$ (400 MHz,  $\text{CDCl}_3$ )  $\delta$  8.35-8.34 (d,  $J = 2.4$  Hz, 1H), 7.20-7.19 (d,  $J = 2.4$  Hz, 1H), 7.05-7.00 (m, 3 H), 6.93-6.73 (m, 6 H), 3.85 (s, 2 H), 3.82 (s, 2 H), 3.00-2.95 (m, 2 H), 2.81-2.77 (m, 2H), 2.22-2.19 (m, 18 H).  $^{13}\text{C NMR}$  (100 MHz,  $\text{CDCl}_3$ )  $\delta$  157.7, 147.5, 139.5, 138.4, 137.7, 137.1, 136.7, 136.6, 136.3, 134.43, 134.39, 134.2, 133.9, 133.7, 130.02, 129.97, 129.85, 129.79, 129.75, 129.6, 126.06, 126.04, 125.8, 38.2, 37.9, 37.2, 35.1, 19.72, 19.68, 19.3. **HRMS calcd for  $\text{C}_{33}\text{H}_{38}\text{N}[\text{M}+\text{H}]^+$  448.2999, found 448.2994.**

**3,5-bis(4-methoxybenzyl)-2-(4-methoxyphenethyl)pyridine(4e).**

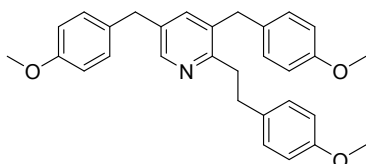

Yellow oil (23.6 mg, 52%).  $^1\text{H NMR}$ (400 MHz,  $\text{CDCl}_3$ )  $\delta$  8.33-8.32 (d,  $J = 1.6$  Hz, 1H), 7.15-7.14 (d,  $J = 1.6$  Hz, 1H), 7.08-7.01 (m, 4 H), 6.94-6.91 (m, 2 H), 6.84-6.78 (m, 6 H) 3.86 (s, 2 H), 3.80 (s, 2H), 3.78 (s, 3 H), 3.77 (s, 6 H), 2.99-2.95 (m, 2 H), 2.85-2.81 (m, 2H).  $^{13}\text{C NMR}$  (100 MHz,  $\text{CDCl}_3$ )  $\delta$  158.11, 158.07, 157.8, 157.5, 147.5, 138.1, 134.3, 134.1, 133.8, 132.3, 131.6, 129.7, 129.6, 129.3, 113.99, 113.95, 113.7, 55.25, 55.23, 37.7, 37.4, 37.0, 34.6. **HRMS calcd for  $\text{C}_{30}\text{H}_{32}\text{NO}_3[\text{M}+\text{H}]^+$  454.2377, found 454.2371.**

**3,5-bis(2-fluorobenzyl)-2-(2-fluorophenethyl)pyridine(4f).**

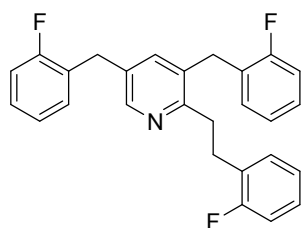

Yellow oil (24.2 mg, 58%).  $^1\text{H NMR}$ (400 MHz,  $\text{CDCl}_3$ )  $\delta$  8.36-8.35 (d,  $J = 2.0$  Hz, 1H), 7.22-6.97 (m, 12H), 6.90-6.86 (m, 1 H), 3.93-3.91 (m, 4 H) 3.08-2.98 (m, 4 H).  $^{13}\text{C NMR}$  (100 MHz,  $\text{CDCl}_3$ )  $\delta$  162.4, 162.12, 162.08, 160.0, 159.7, 159.6, 157.3, 147.6, 137.9, 132.9, 132.4, 130.8, 130.73, 130.68, 130.54, 130.50, 128.7, 128.6, 128.5, 128.4, 128.3, 128.25, 128.22, 128.17, 127.7, 127.6, 127.1, 127.0, 126.4, 126.3, 124.19, 124.15, 124.11, 123.93, 123.90, 115.5, 115.4, 115.3, 115.2, 115.1, 35.1, 31.72, 31.69, 30.93, 30.90, 28.72, 28.69. **HRMS calcd for  $\text{C}_{27}\text{H}_{23}\text{F}_3\text{N}[\text{M}+\text{H}]^+$  418.1777, found 418.1780.**

**3,5-bis(4-fluorobenzyl)-2-(4-fluorophenethyl)pyridine (4g).**

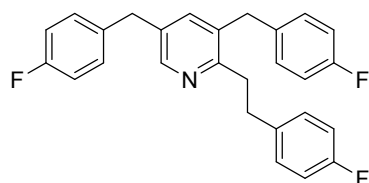

Yellow oil (25.8 mg, 62%).  $^1\text{H NMR}$ (400 MHz,  $\text{CDCl}_3$ )  $\delta$  8.34-8.33 (d,  $J = 2.0$  Hz, 1H), 7.12-7.11 (d,  $J = 2.0$  Hz, 1H), 7.11-7.09 (m, 3 H), 7.04-6.89 (m, 10 H), 3.90 (s, 2 H), 3.81 (s, 2 H), 2.96-2.94 (m, 2 H), 2.90-2.88 (m, 2H).  $^{13}\text{C NMR}$  (100 MHz,  $\text{CDCl}_3$ )  $\delta$  162.77, 162.71, 162.5, 160.34, 160.28, 160.1, 157.4, 147.7, 138.1, 137.42, 137.39, 135.67, 135.64, 135.05, 135.01, 134.0, 133.4, 130.2, 130.1, 130.0, 129.9, 129.8, 129.7, 115.5, 115.3, 115.1, 114.9, 37.7, 37.4, 36.7, 34.4. **HRMS calcd for  $\text{C}_{27}\text{H}_{23}\text{F}_3\text{N}[\text{M}+\text{H}]^+$  418.1777, found 418.1773.**

**Reference:**

1. Q. Wang, C.-H. Wan, Y. Gu, J.-T. Zhang, L.-F. Gao, and Z.-Y. Wang, *Green Chem.*, 2011, **13**, 578-581.
2. S. M. Spinella, Z.-H. Guan, J. Chen, and X. Zhang, *Synthesis*, 2009, **18**, 3094-3098.
3. H. Adams, E. Chekmeneva, C. A. Hunter, M. C. Misuraca, C. Navarro, and S. M. Turega, *J. Am. Chem. Soc.* 2013, **135**, 1853–1863.
4. T.-H. Chuang, Y.-C. Chen, and S. Pola, *J. Org. Chem.* 2010, **75**, 6625–6630.

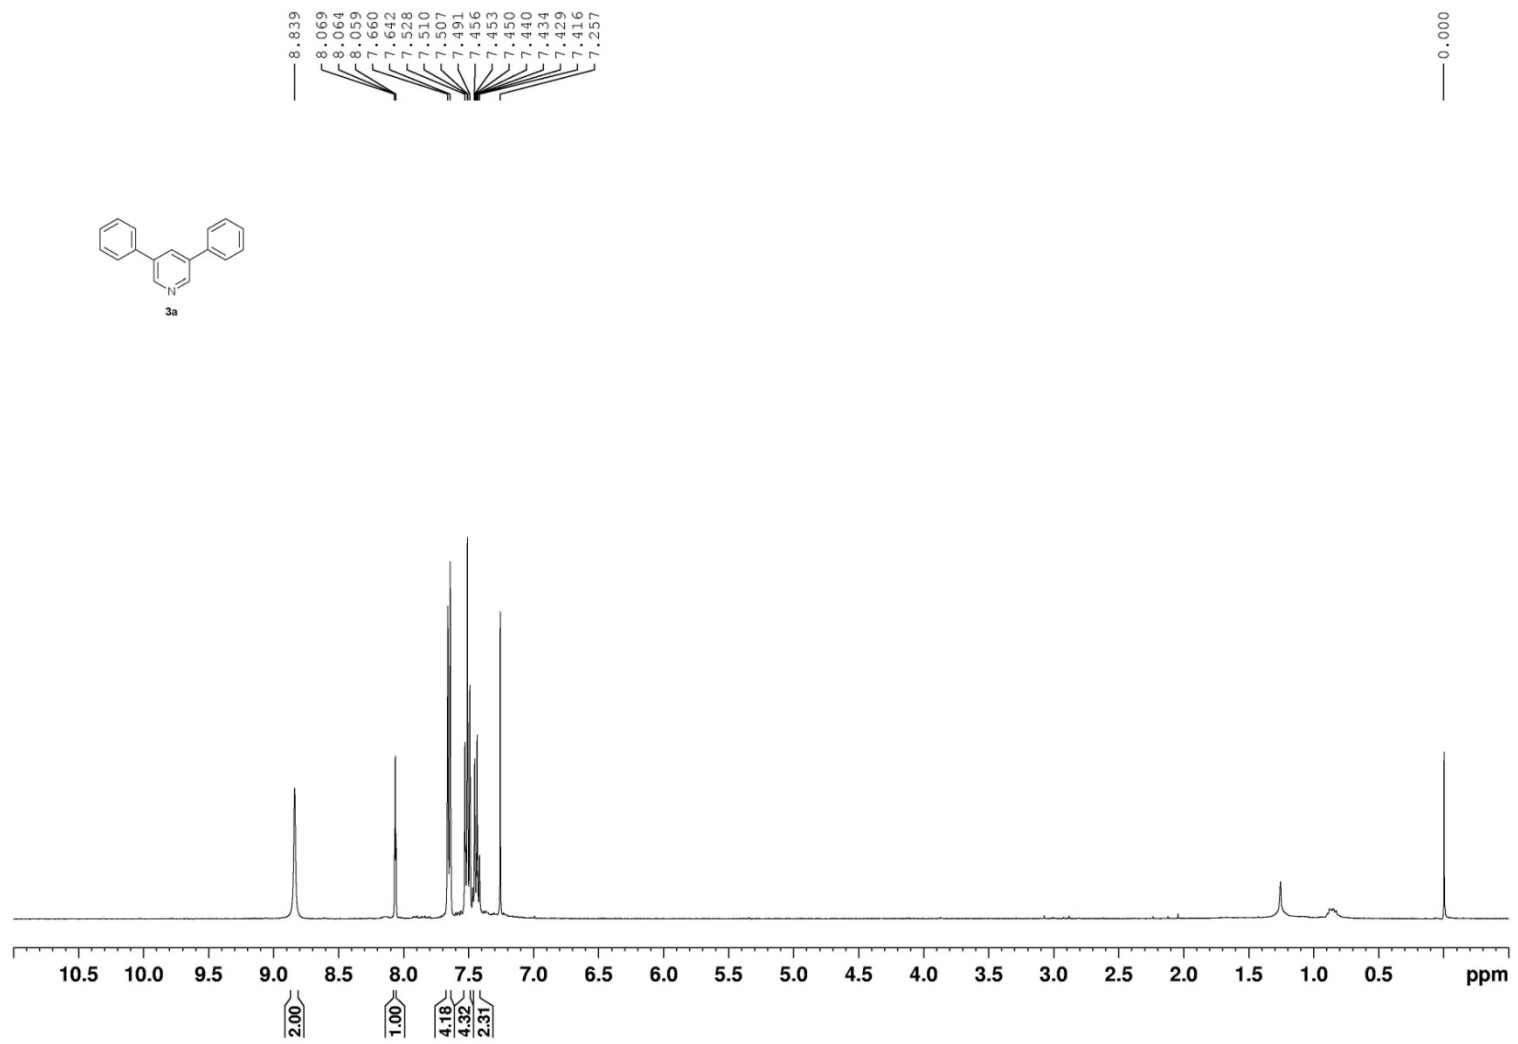

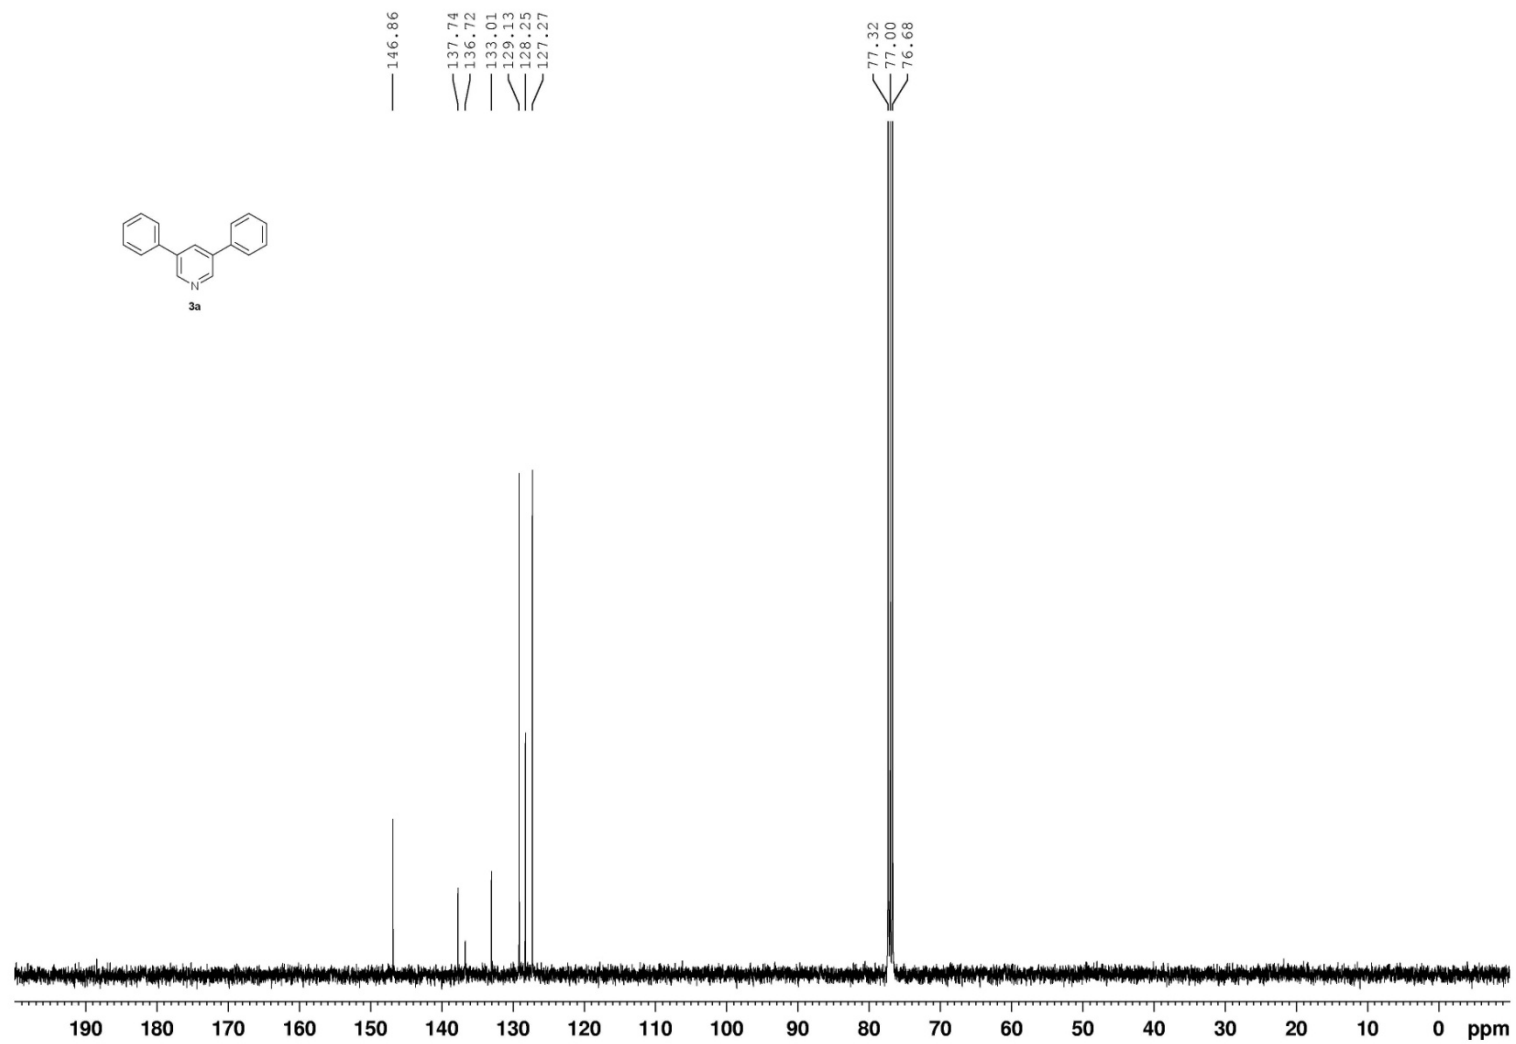



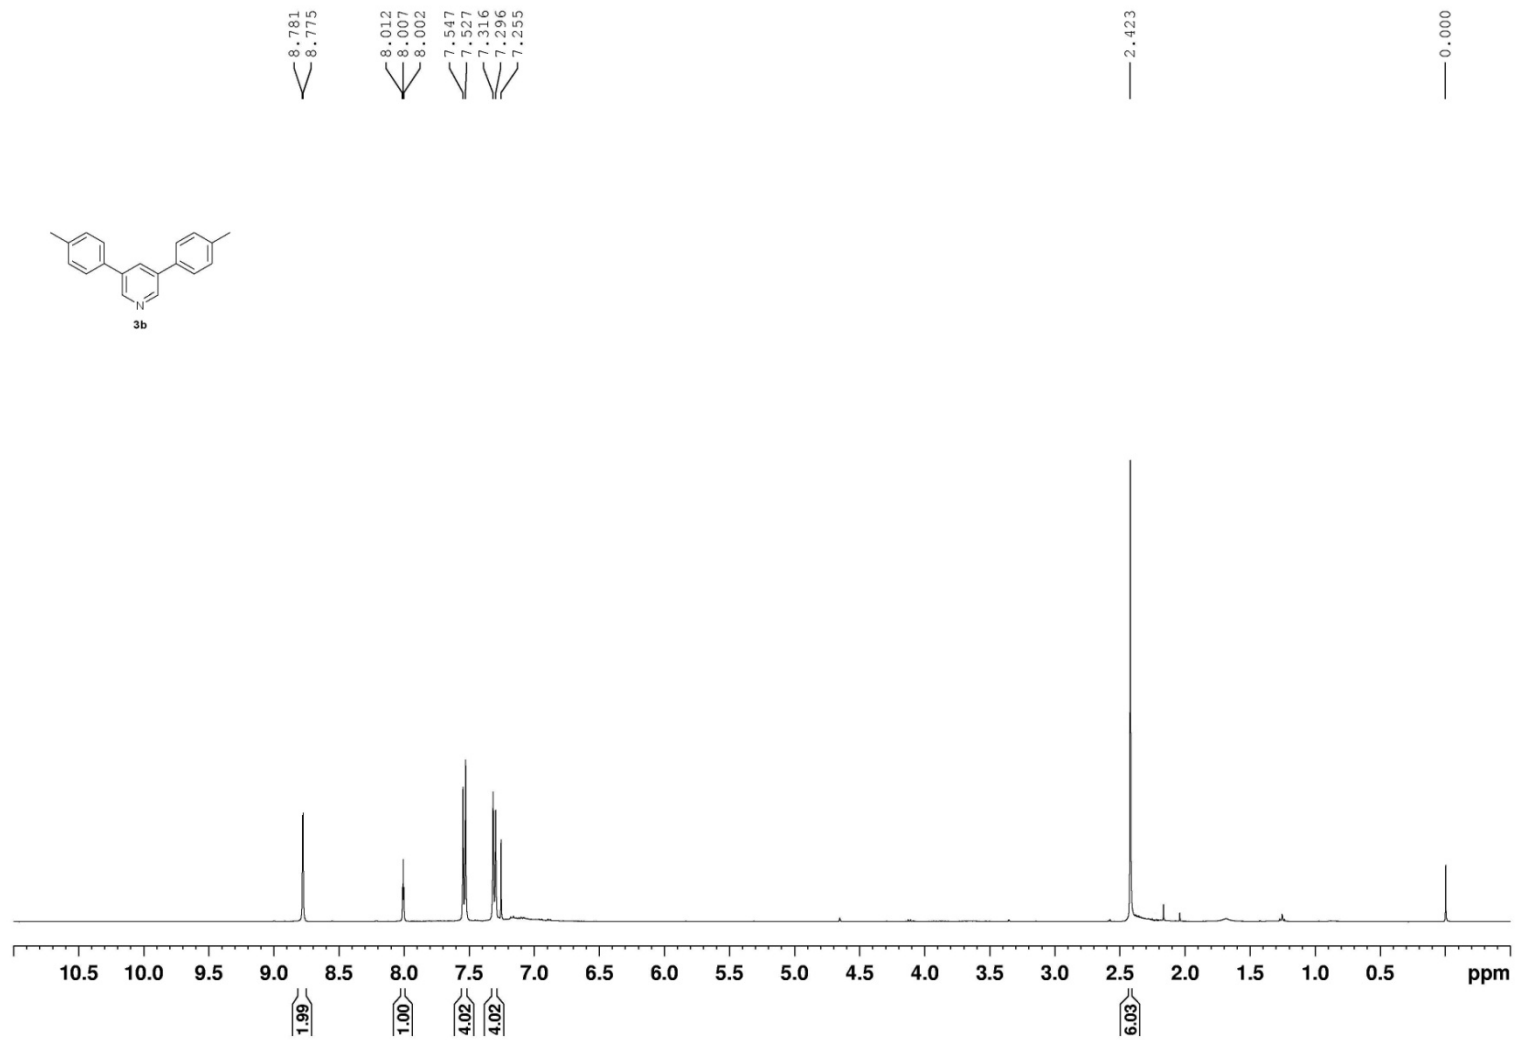

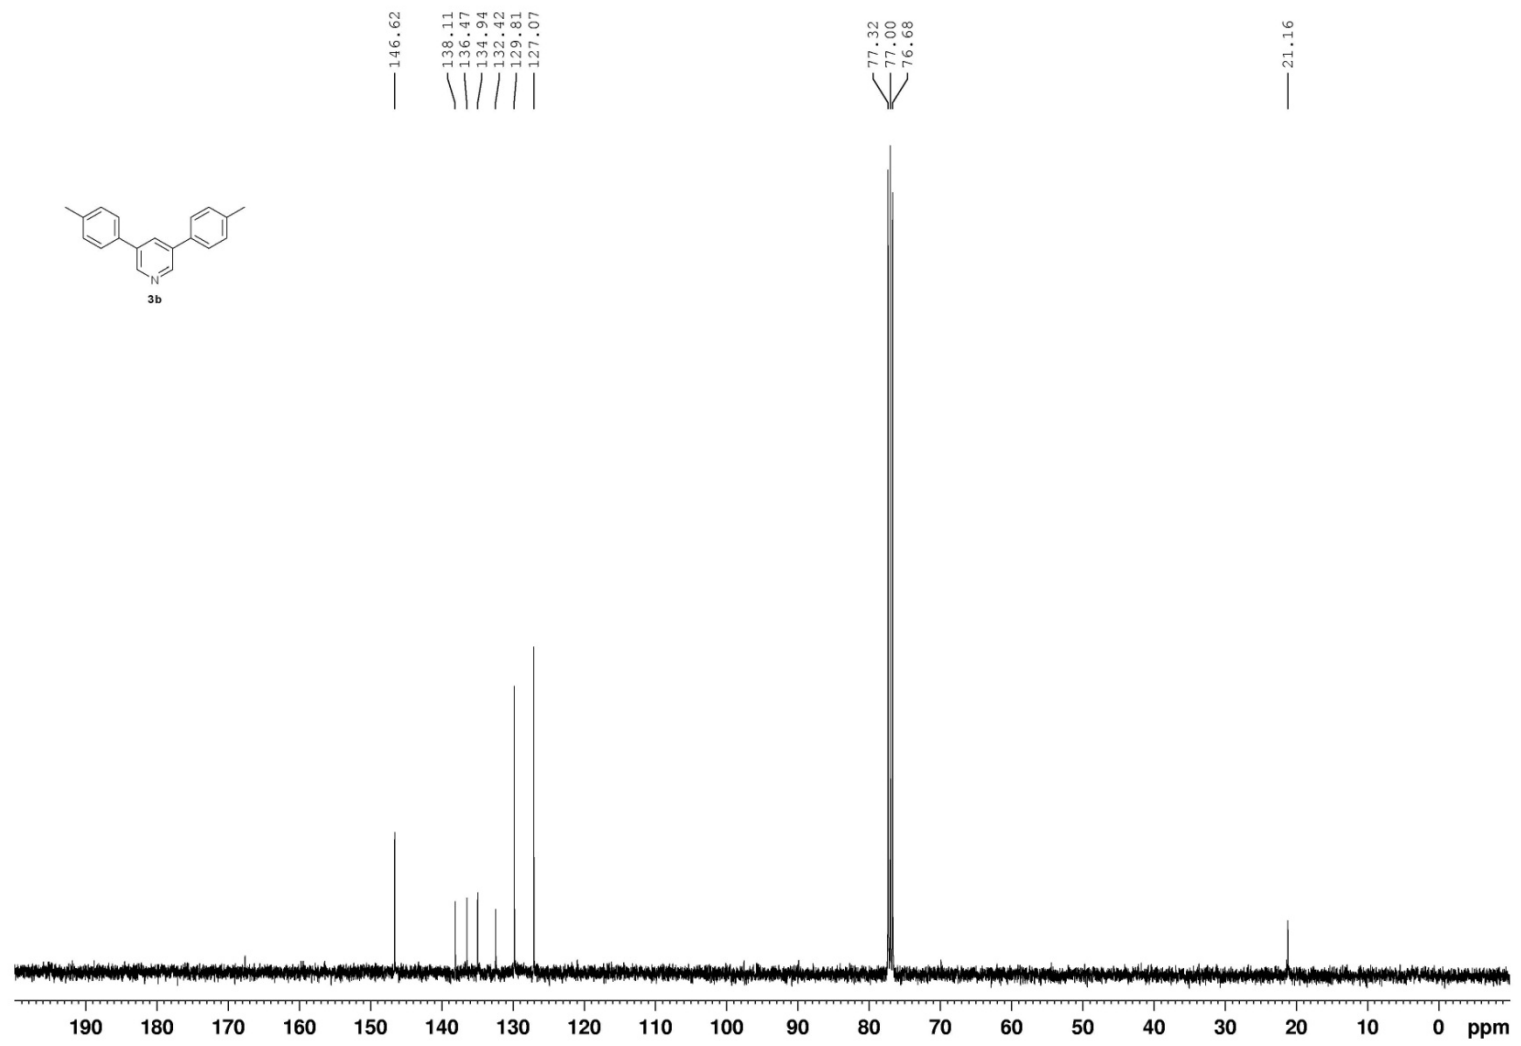

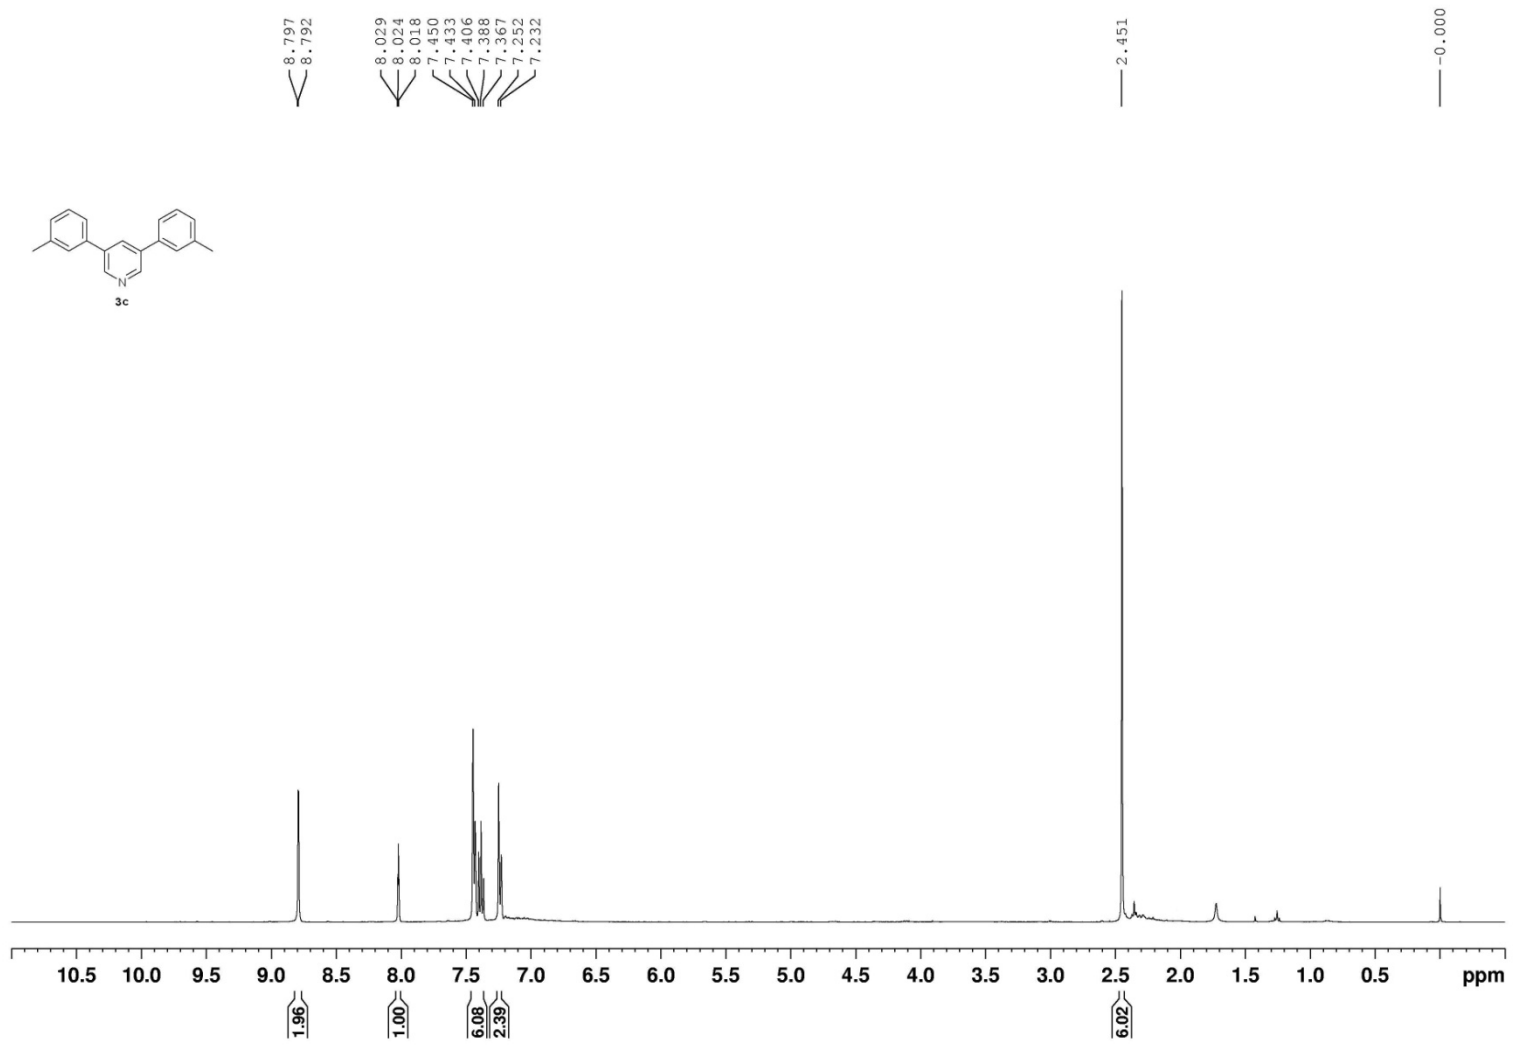

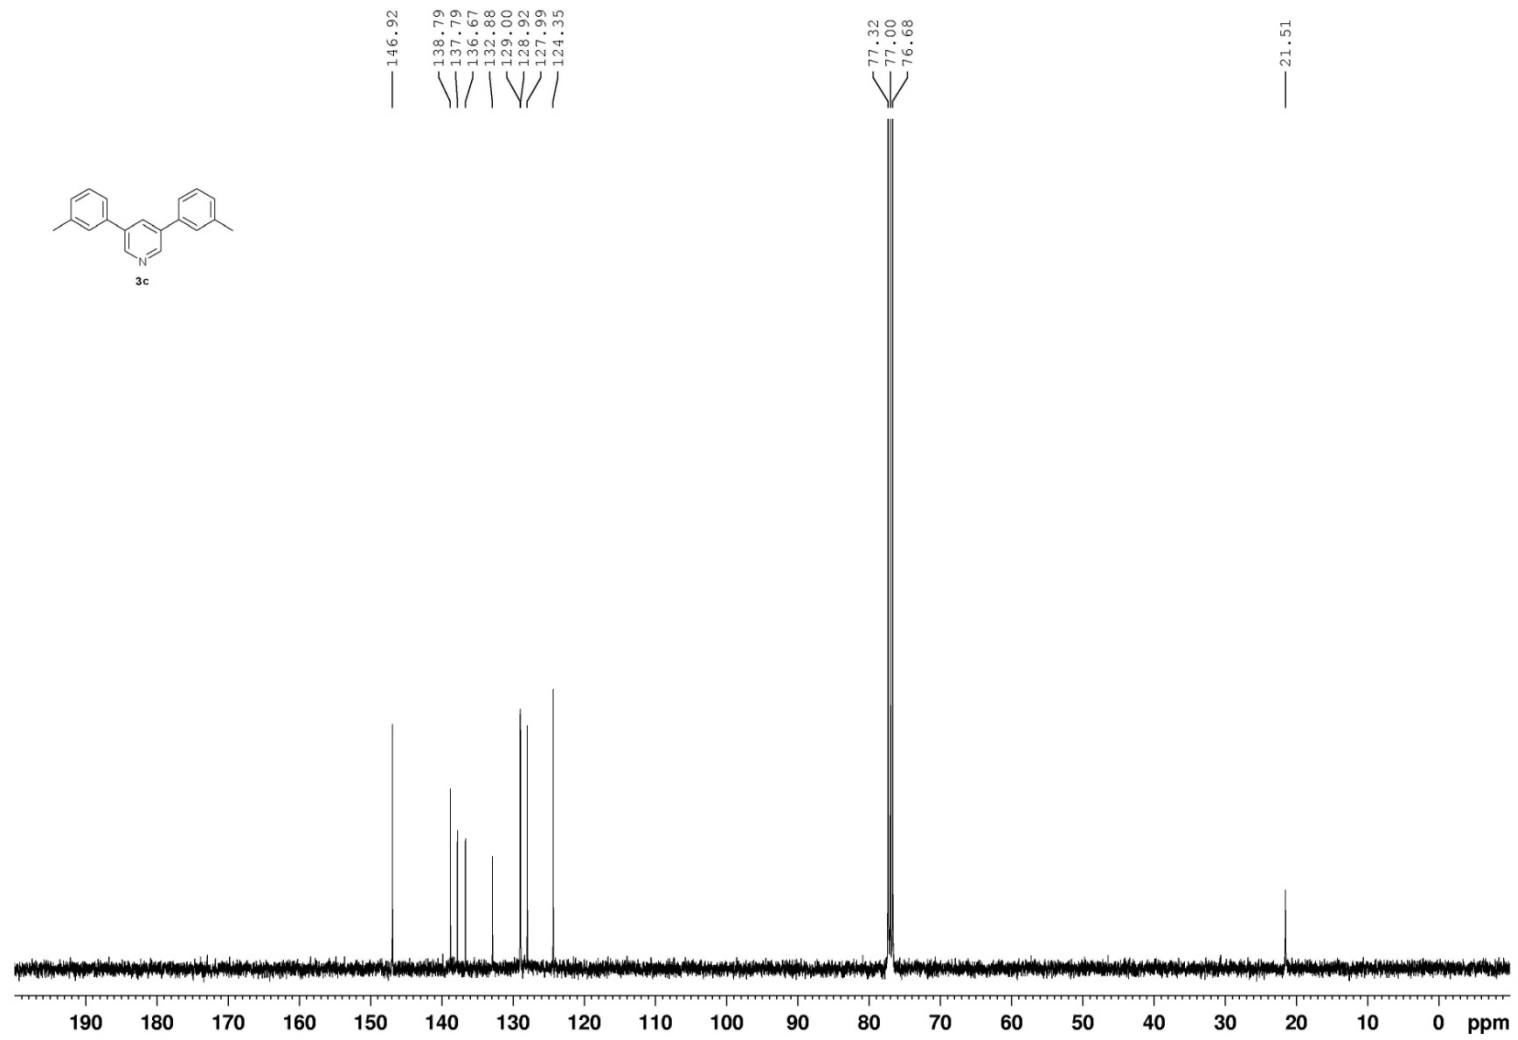

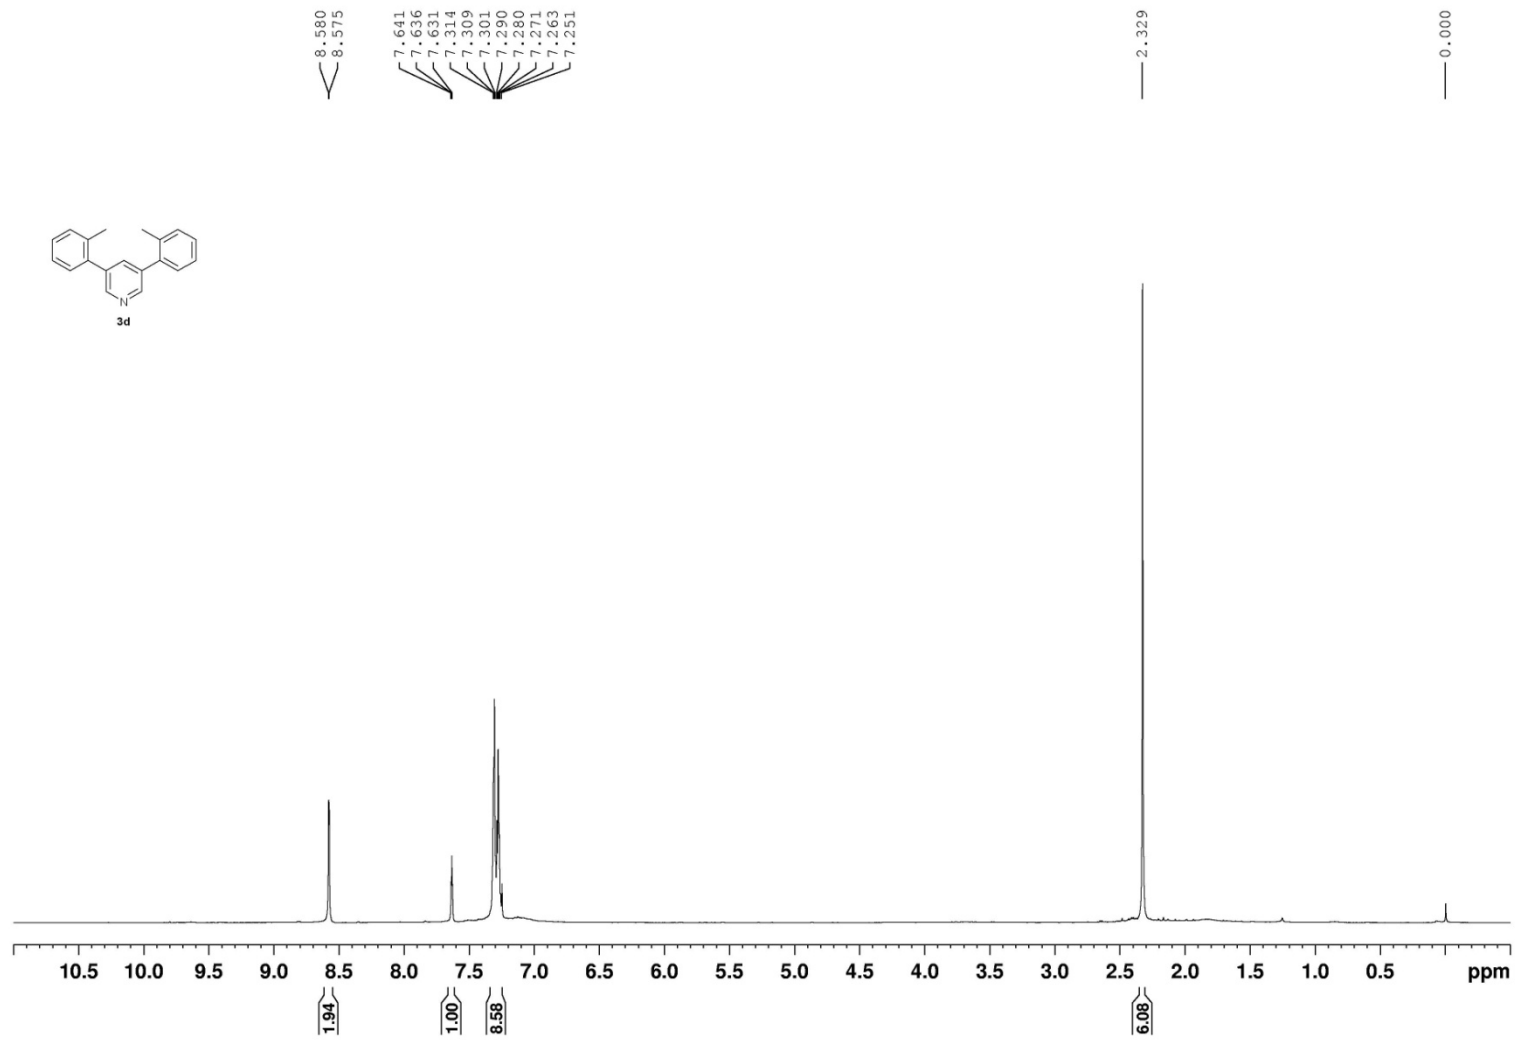

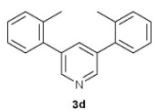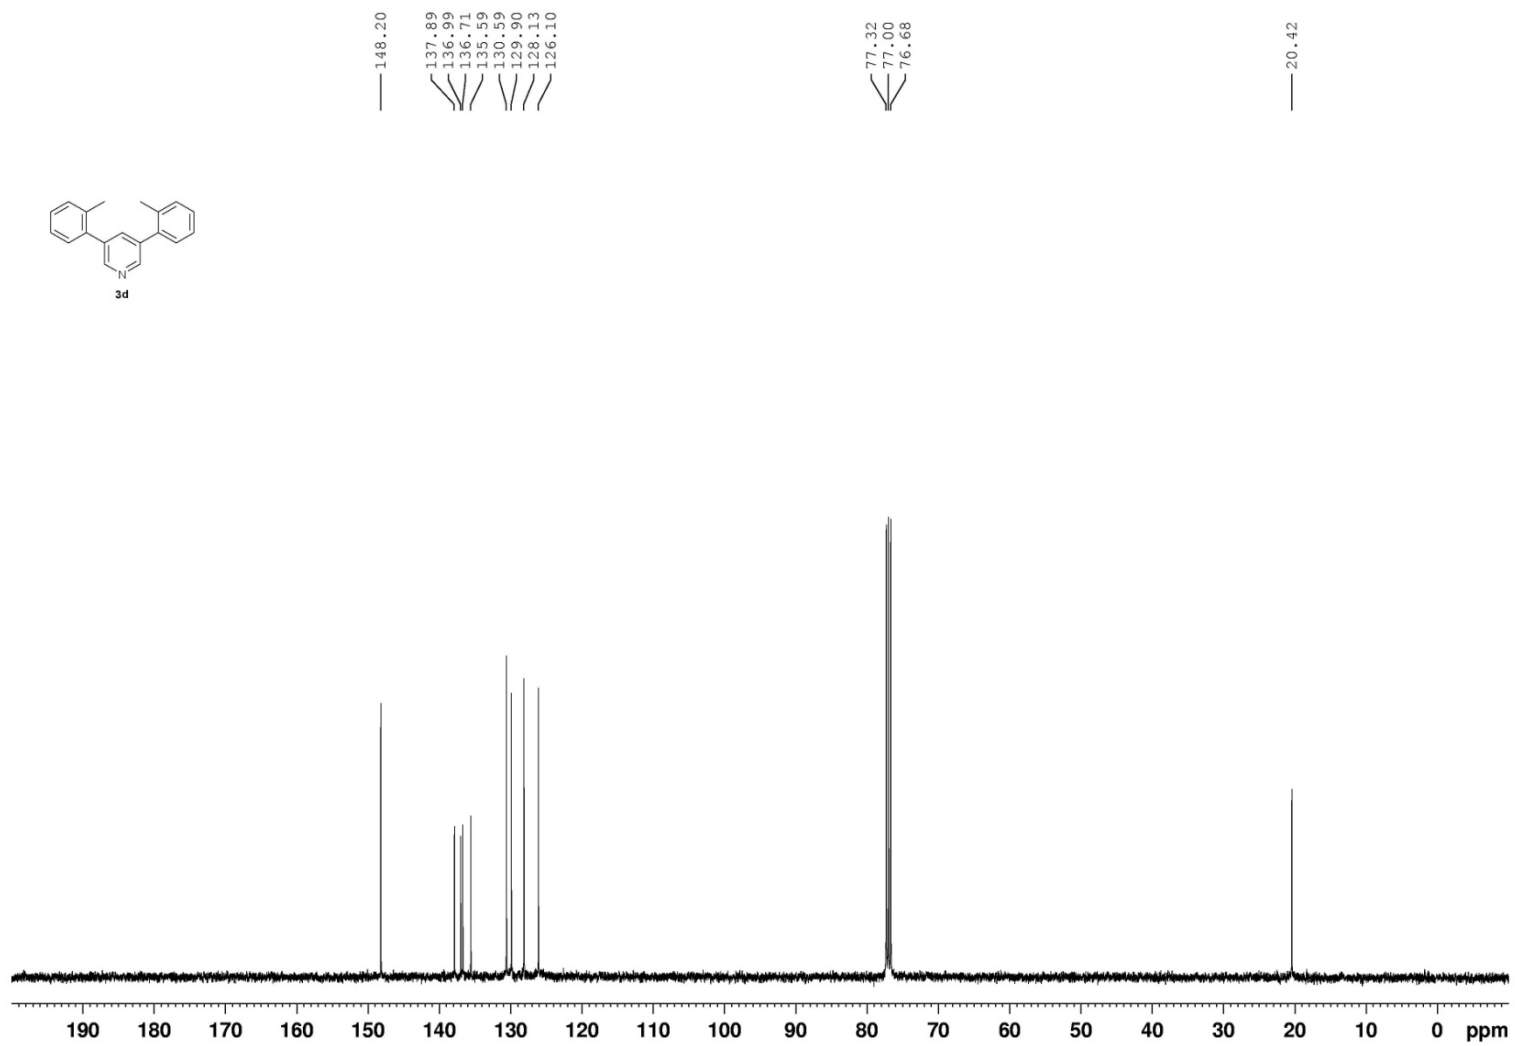

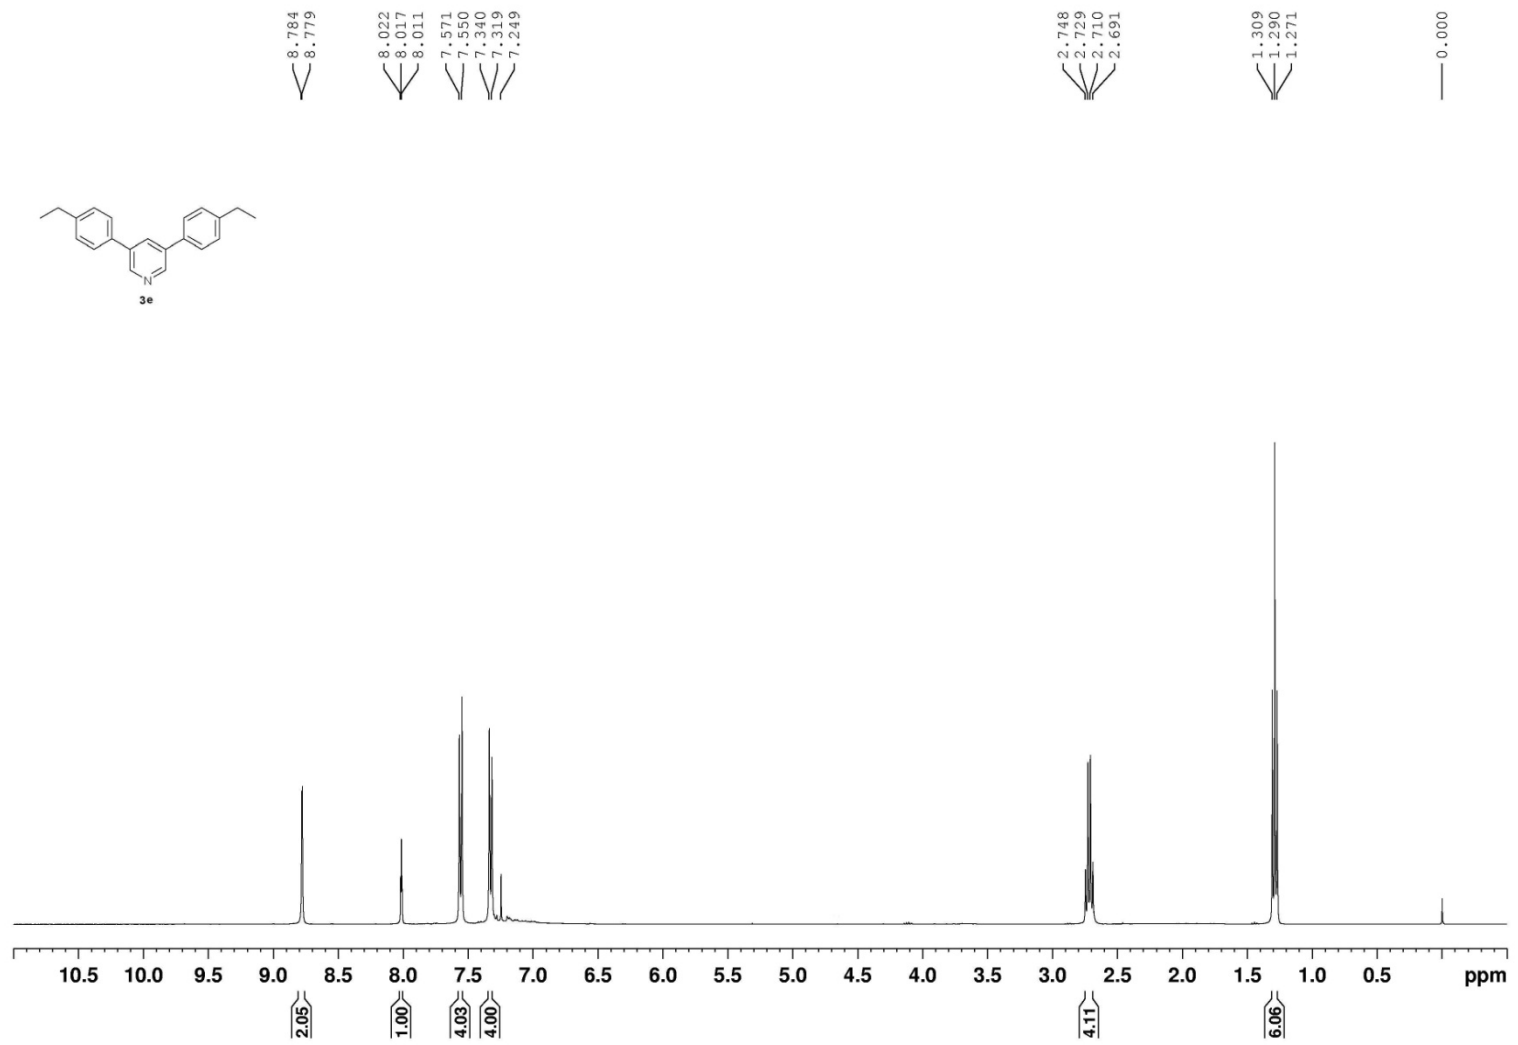

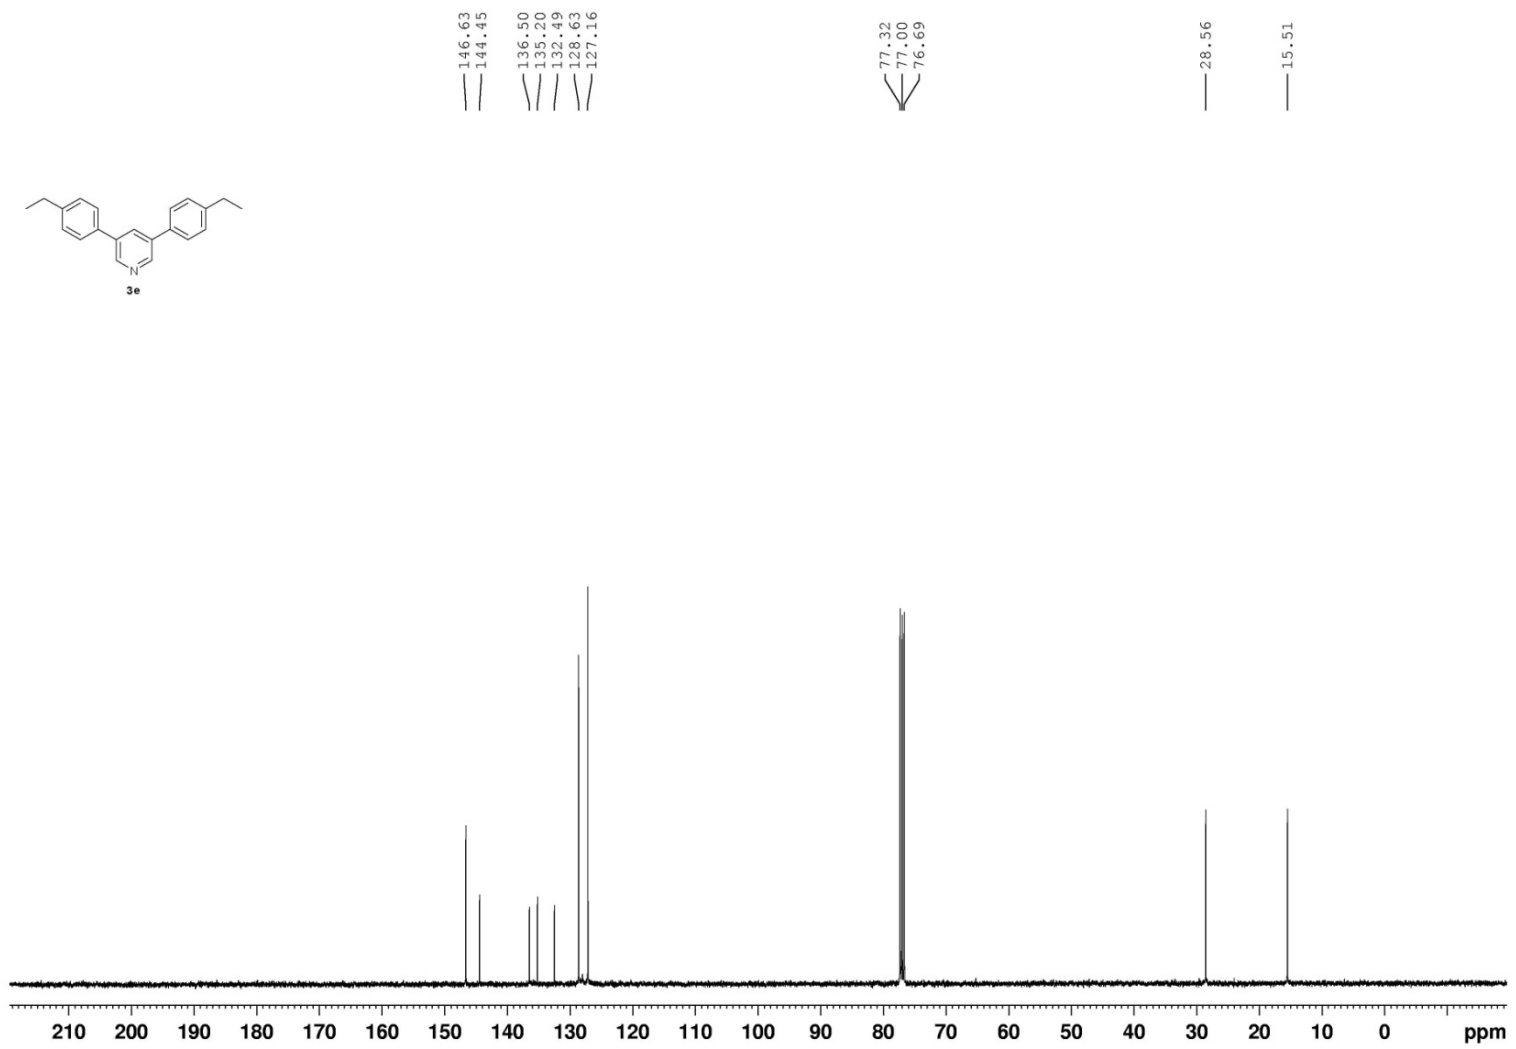



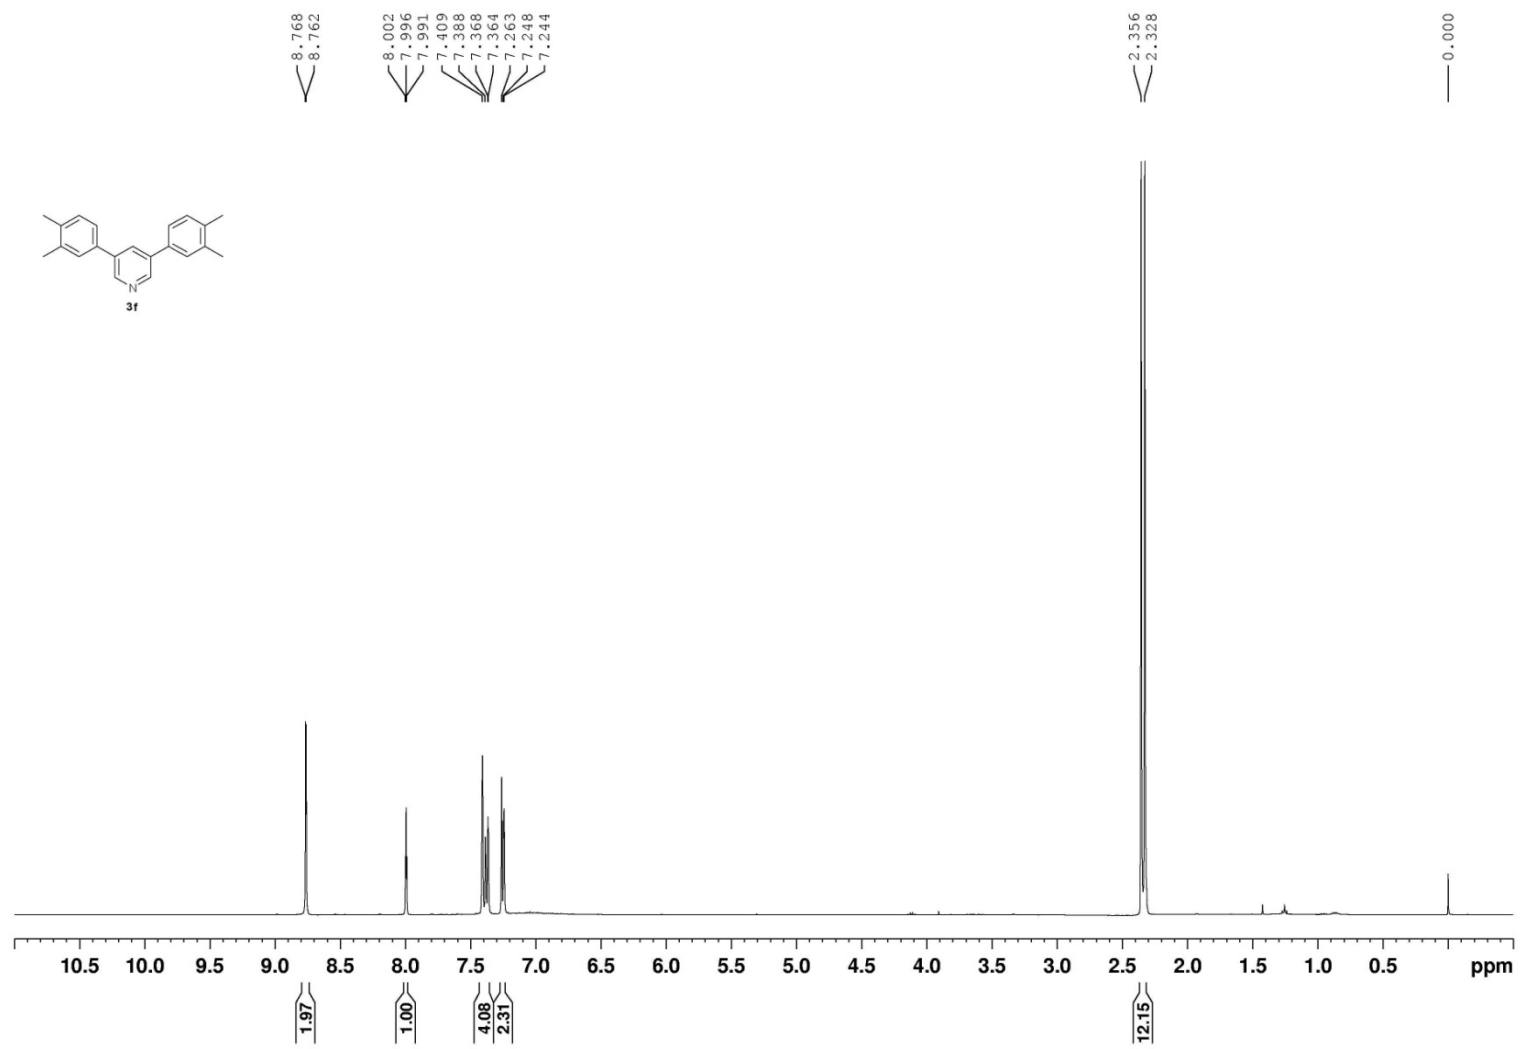

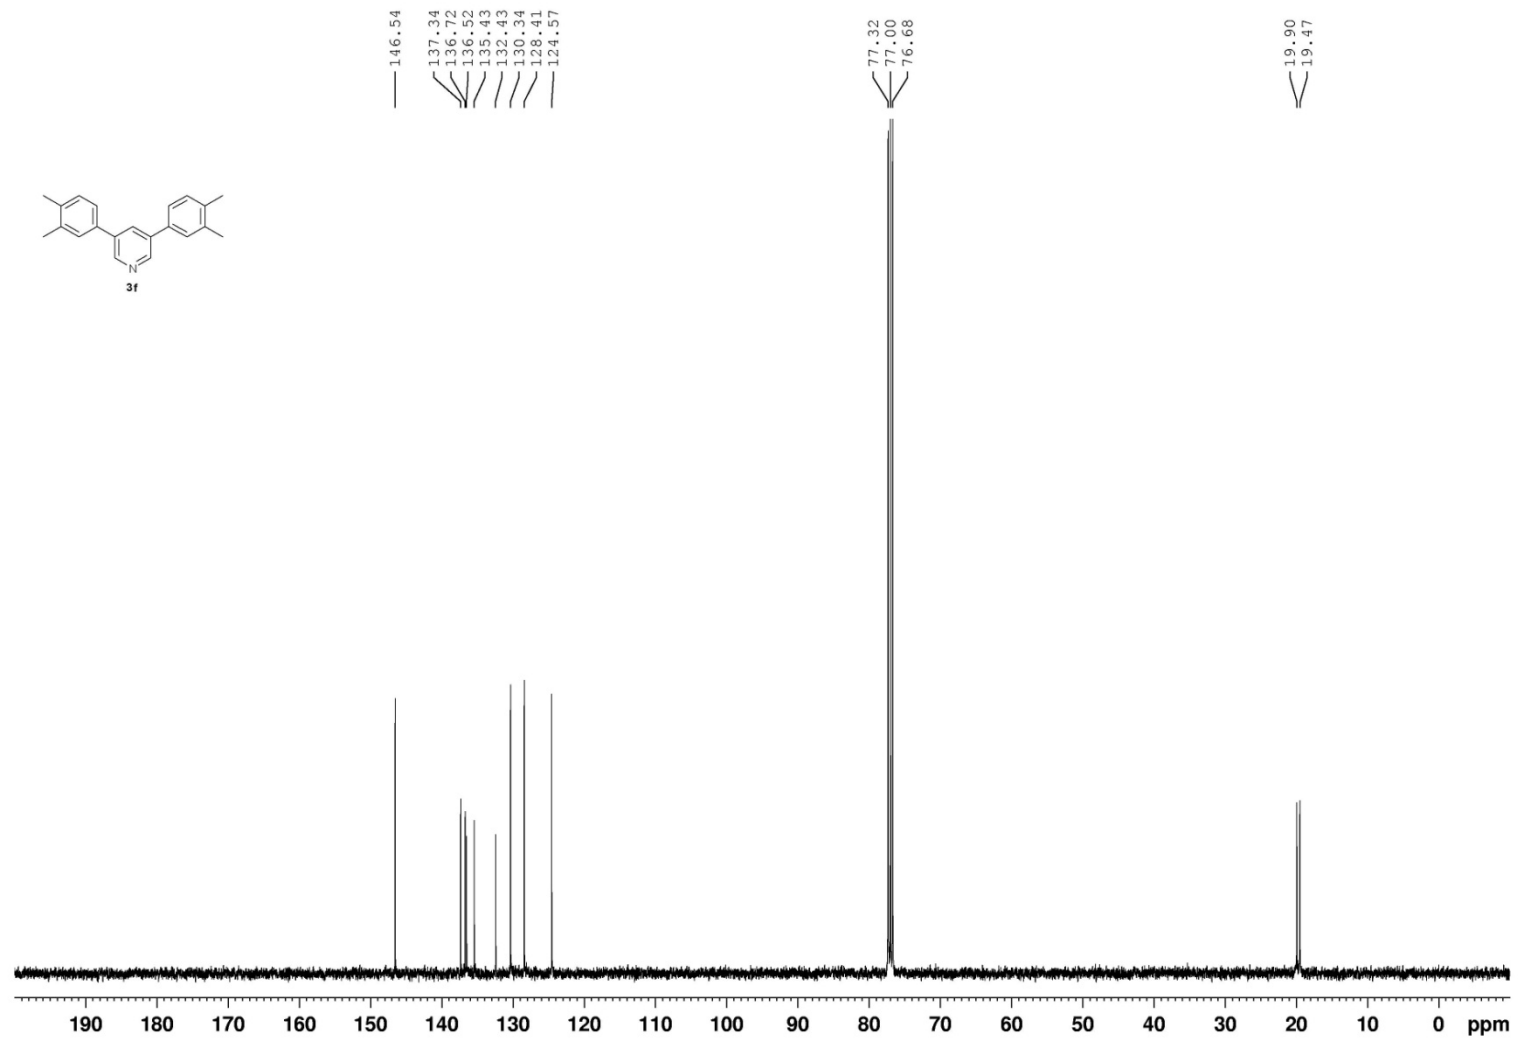

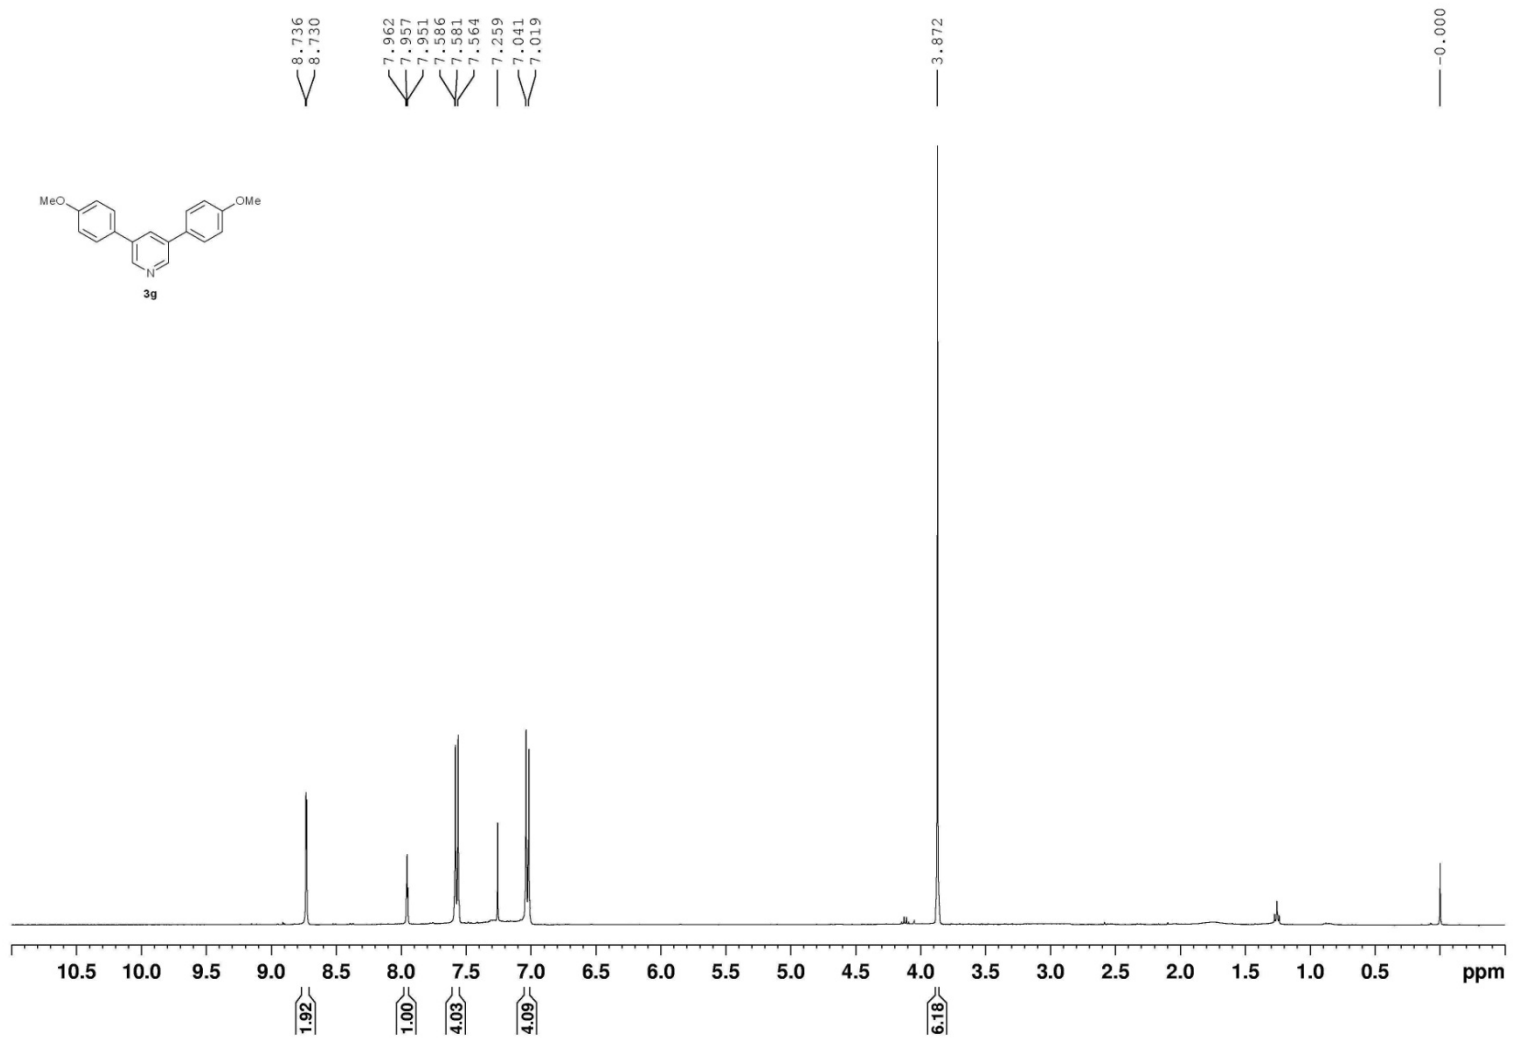

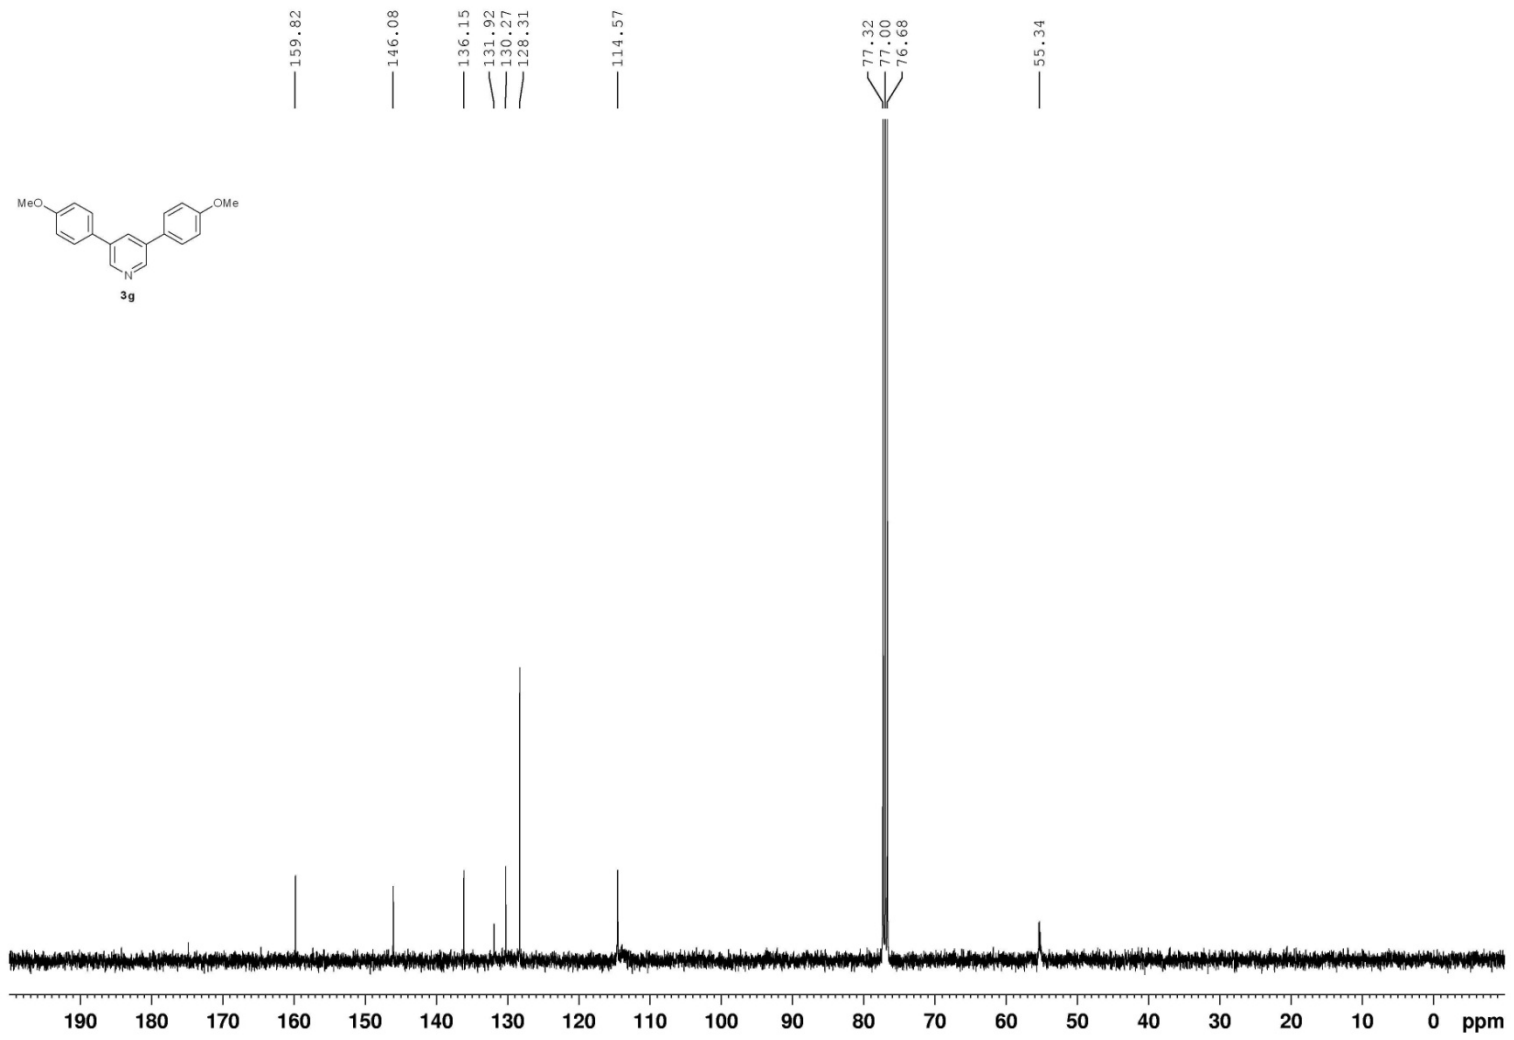

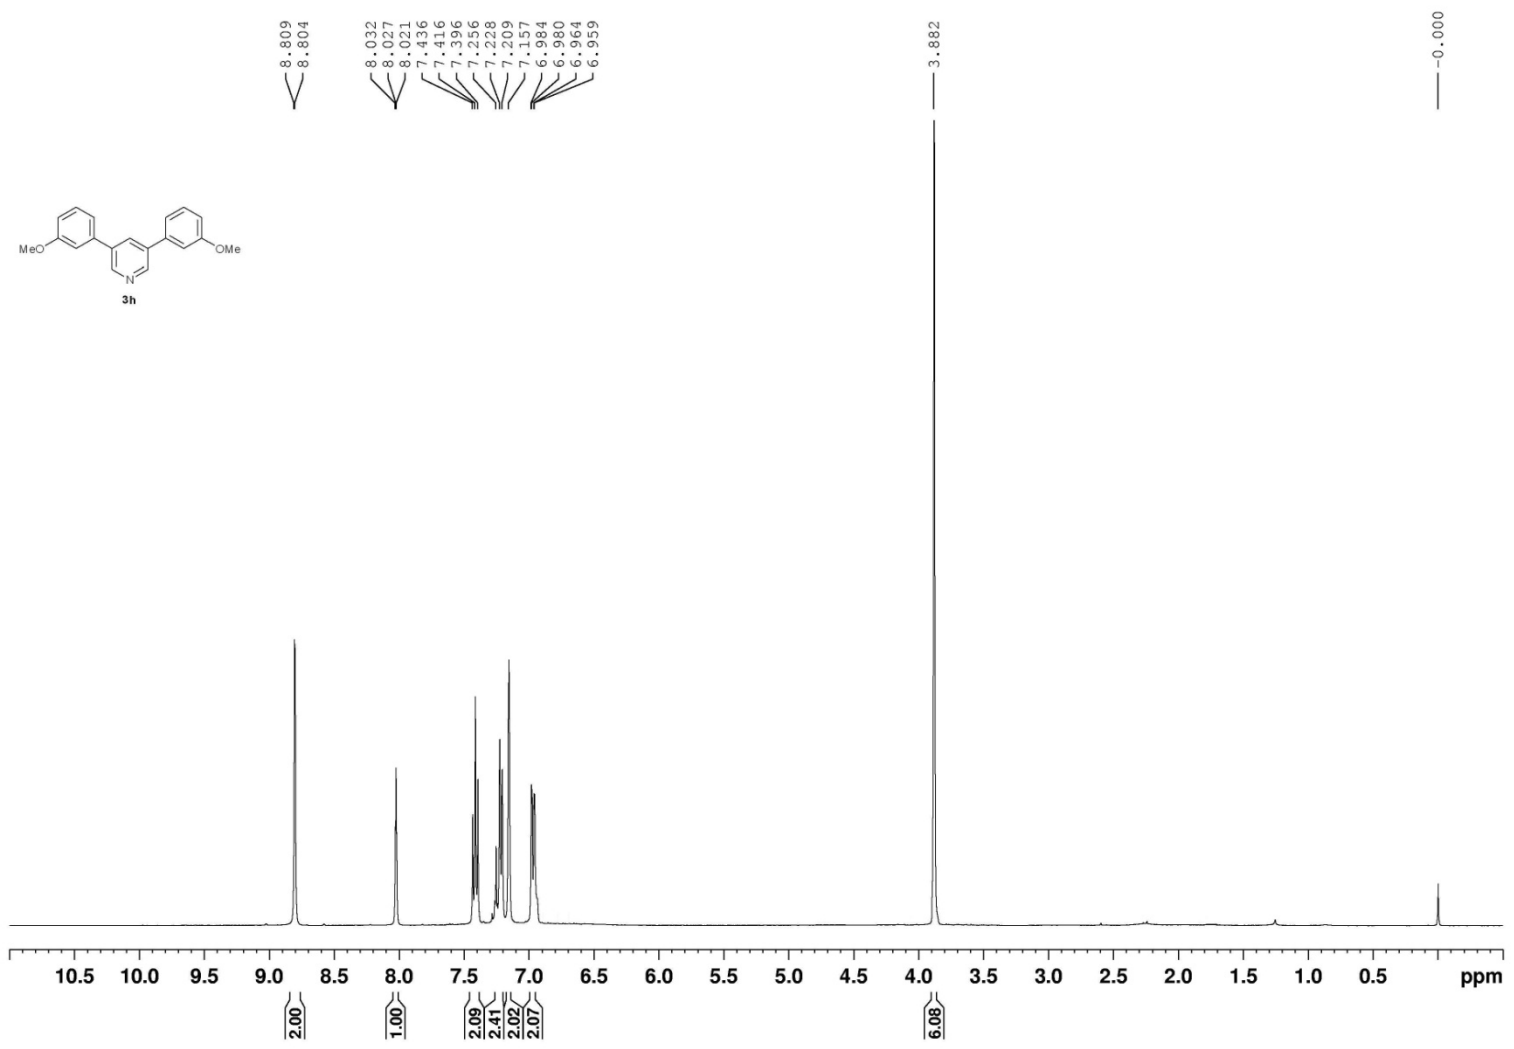

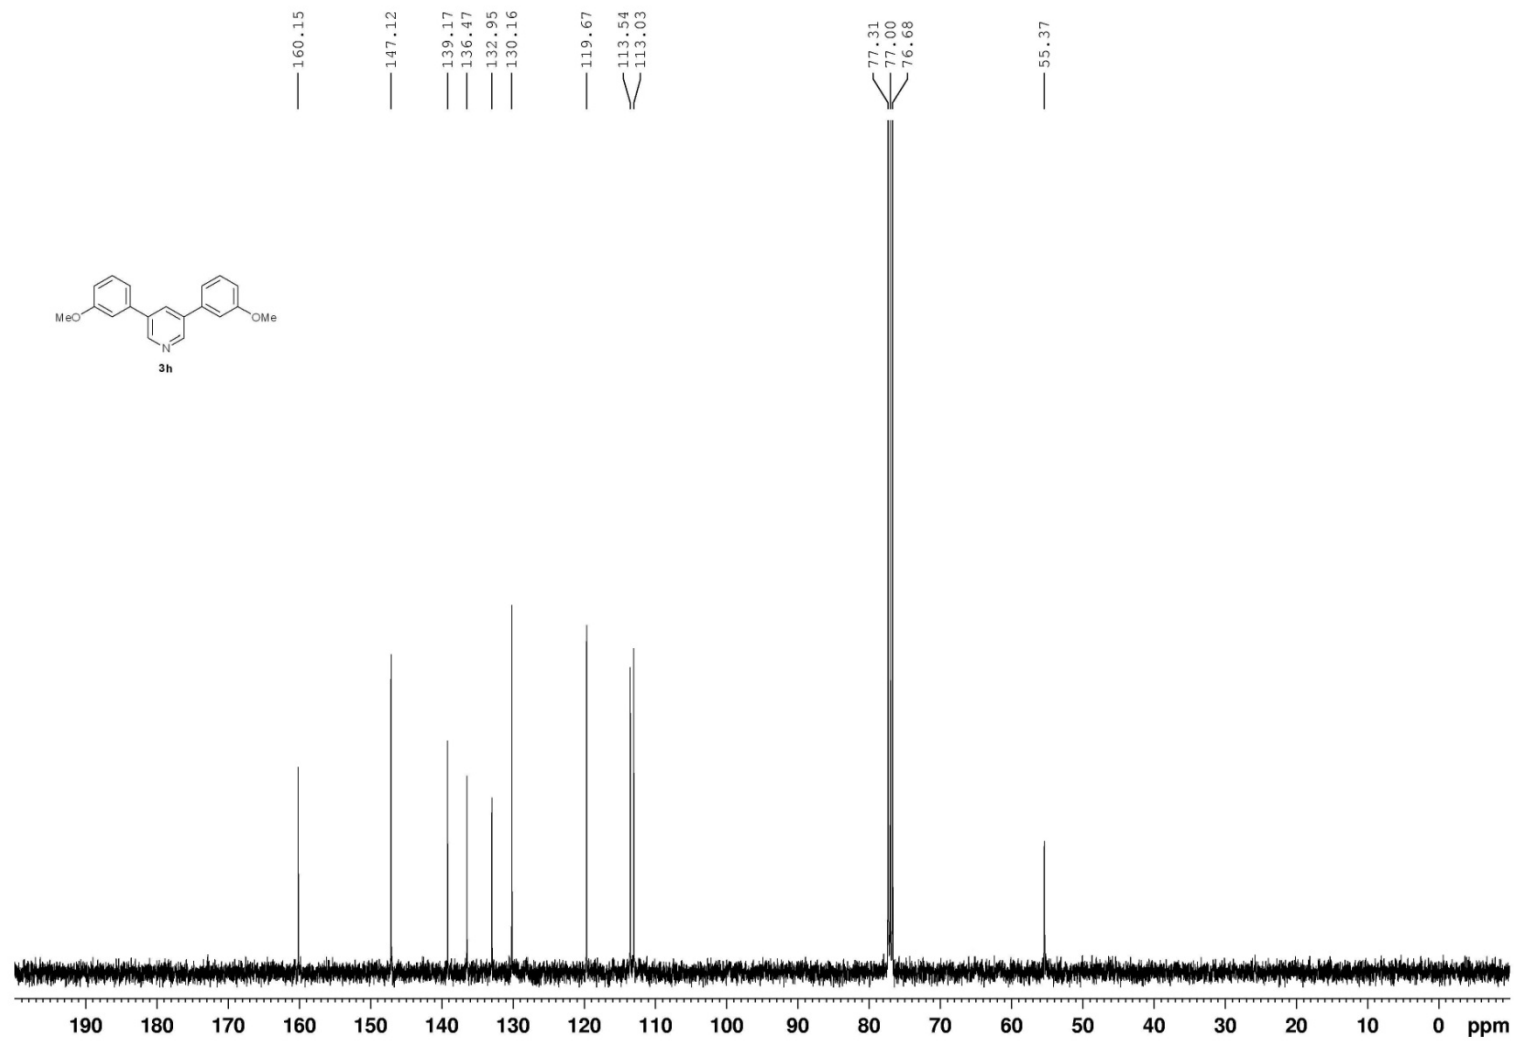

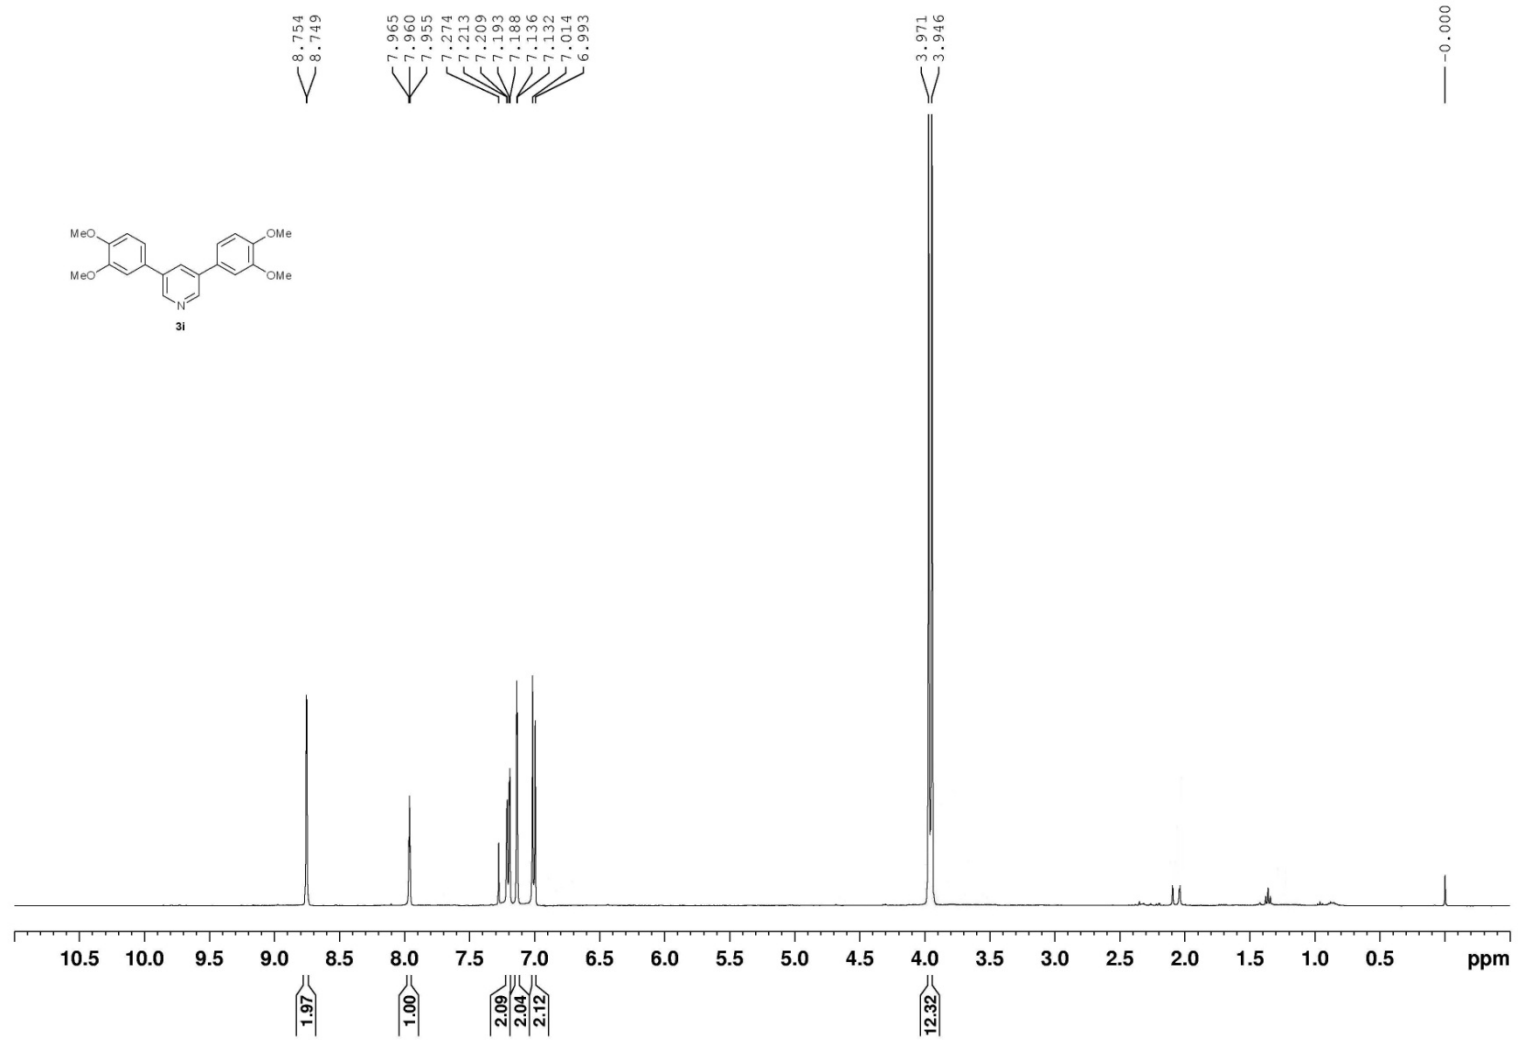

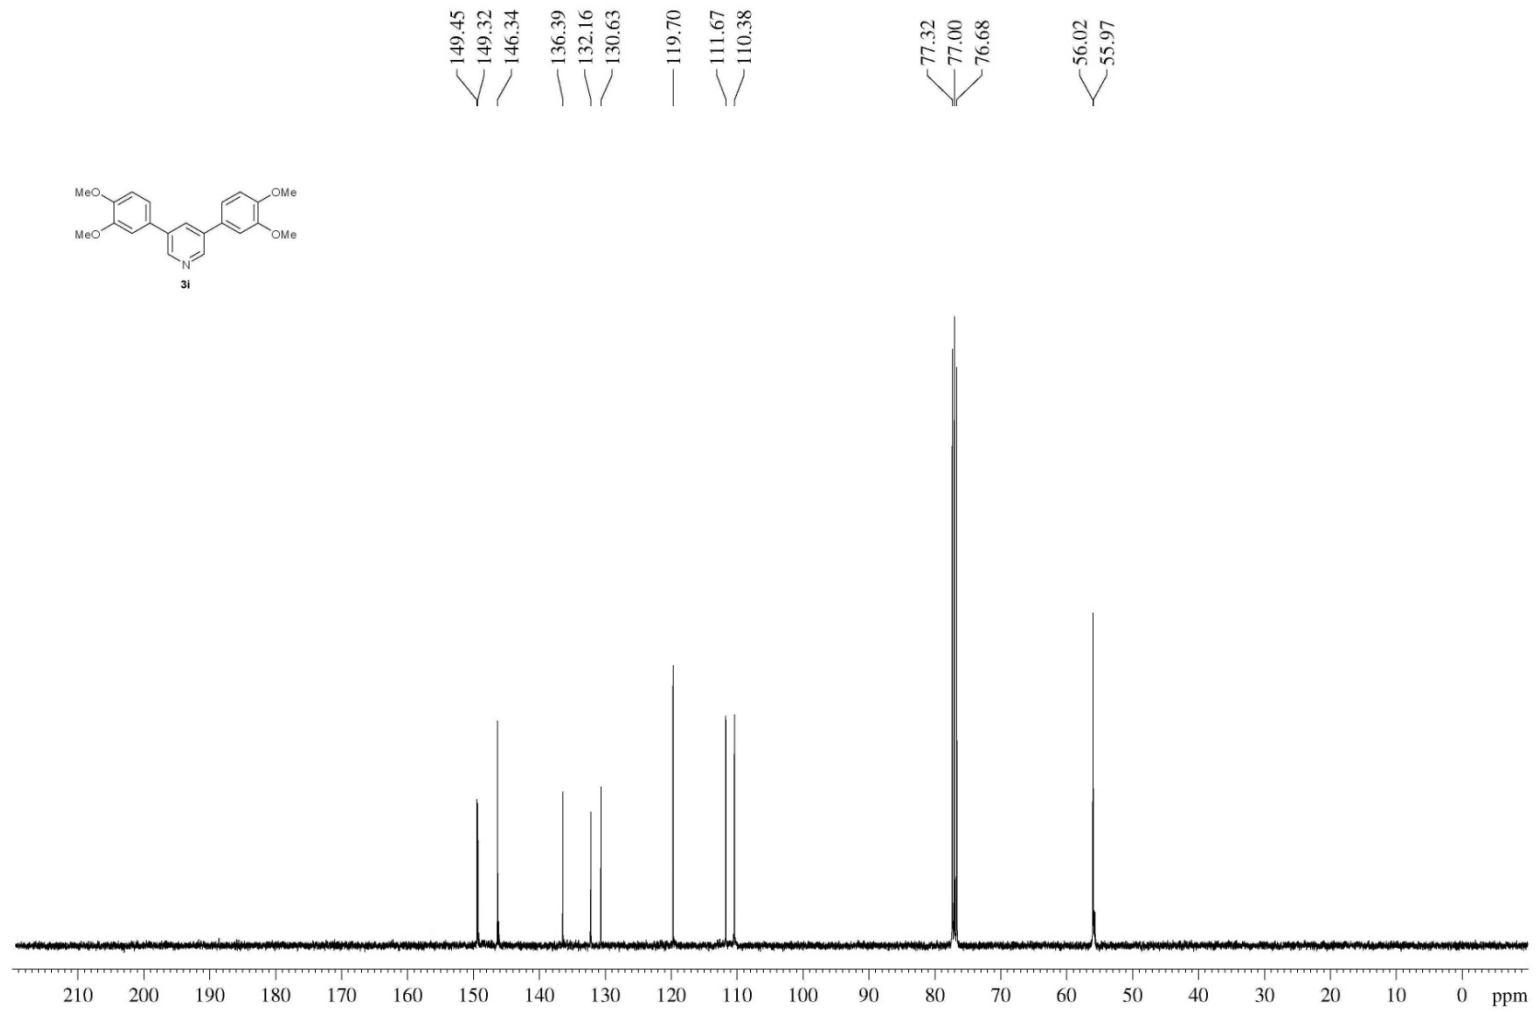



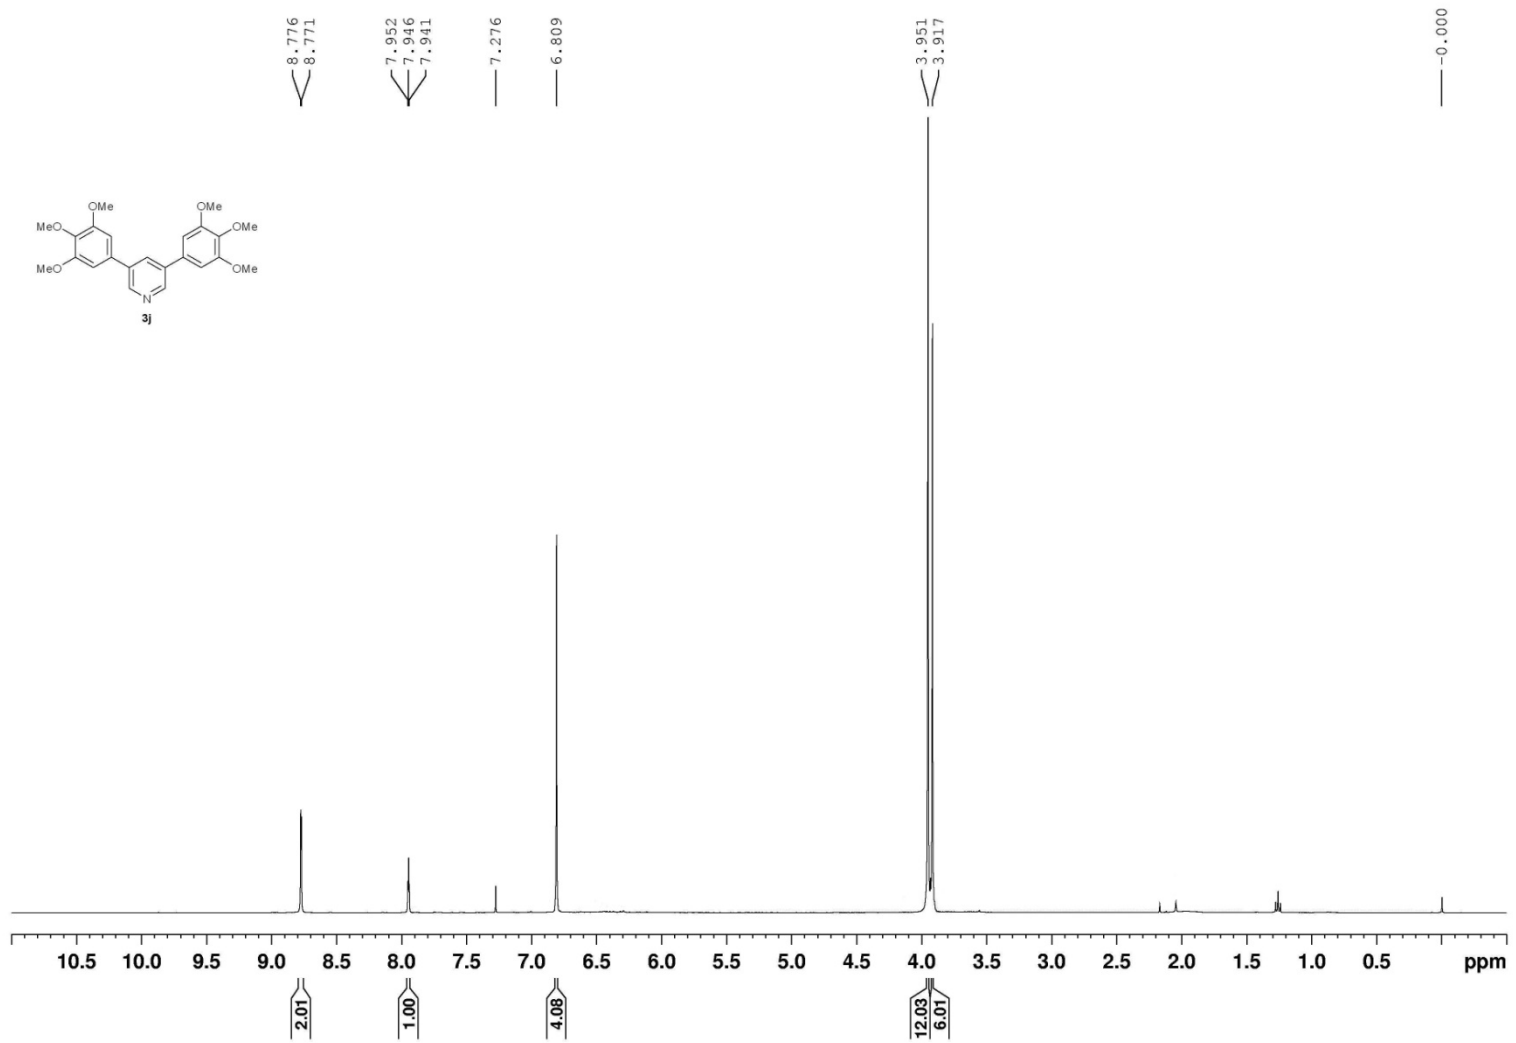

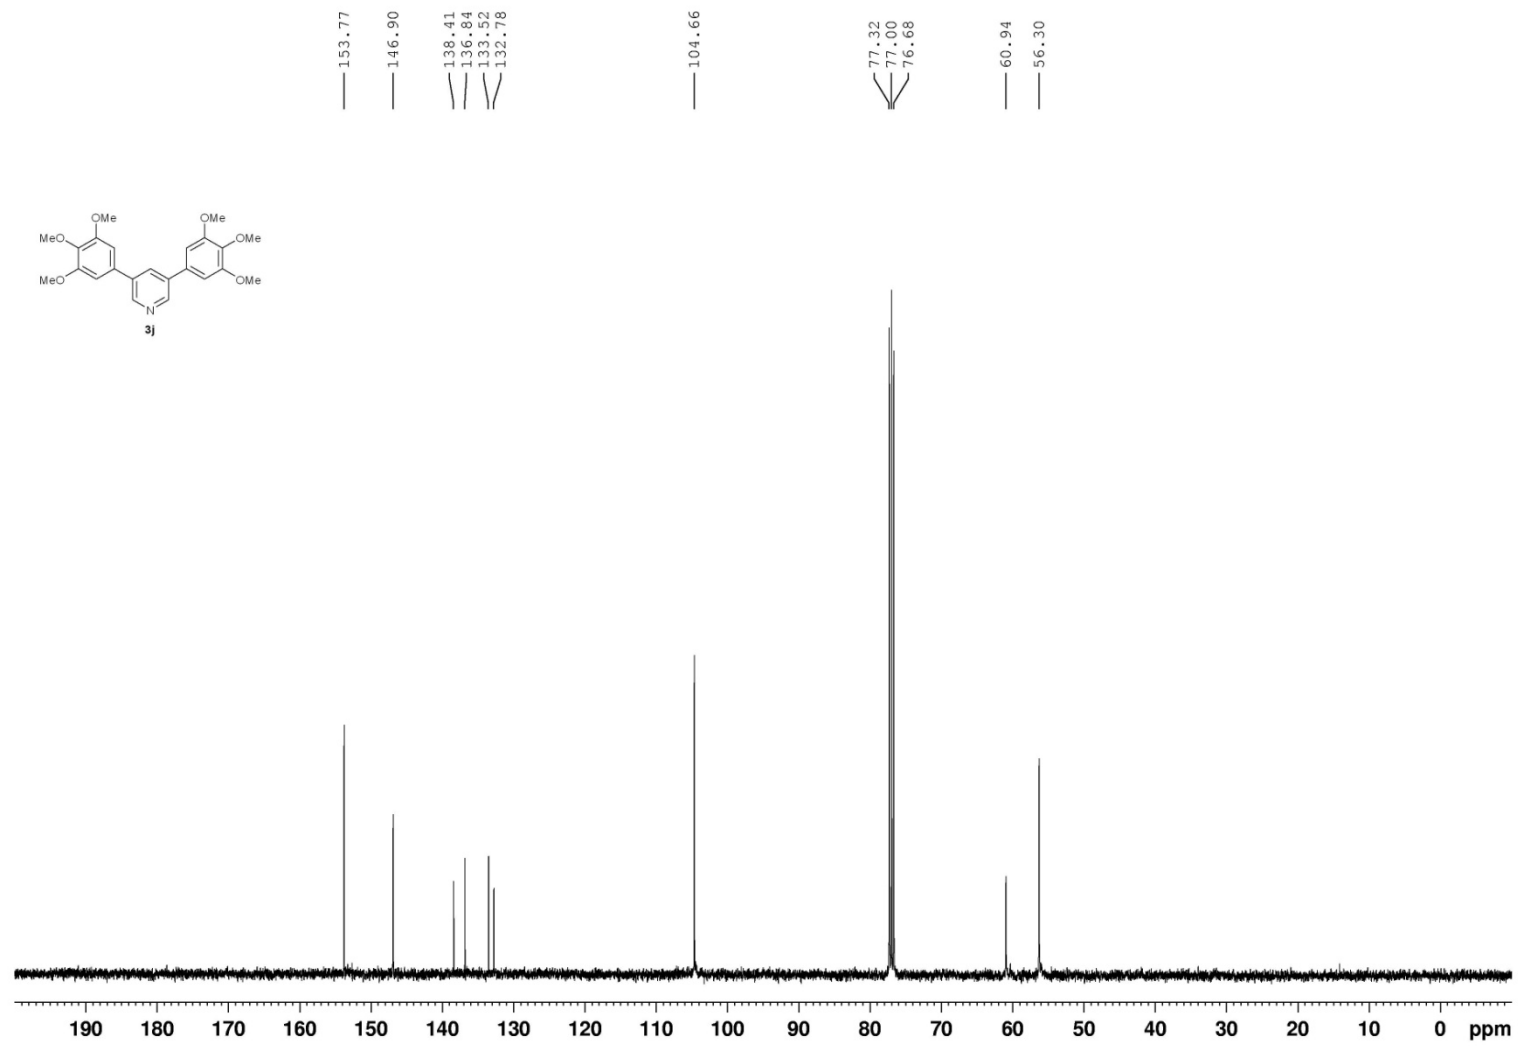

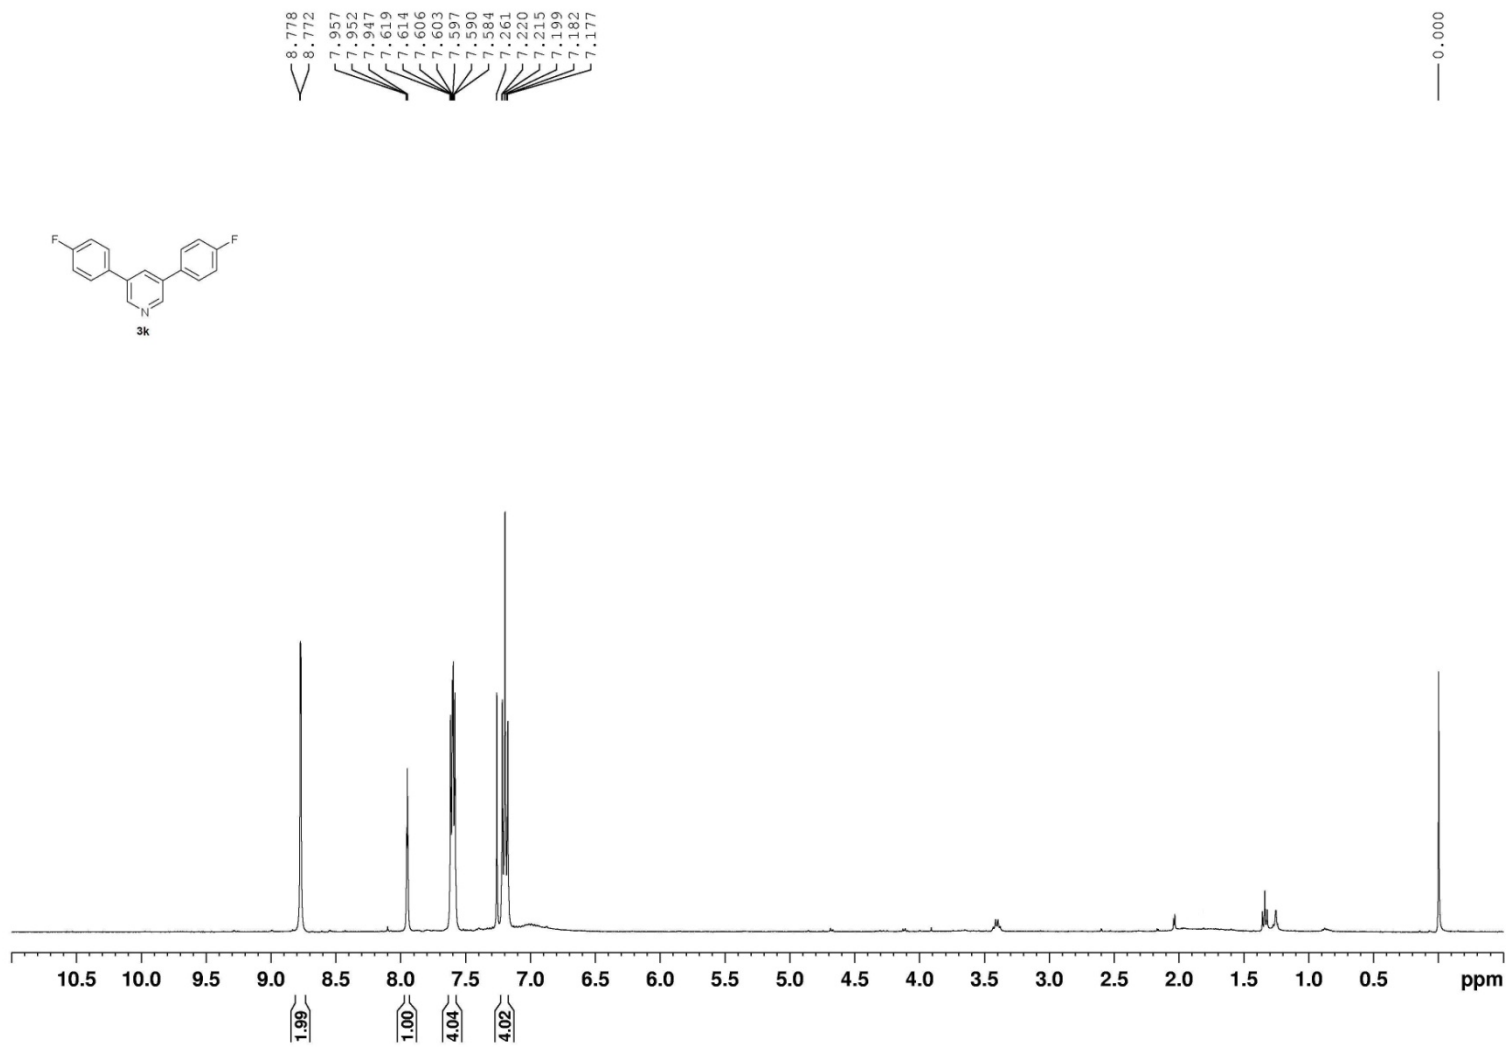

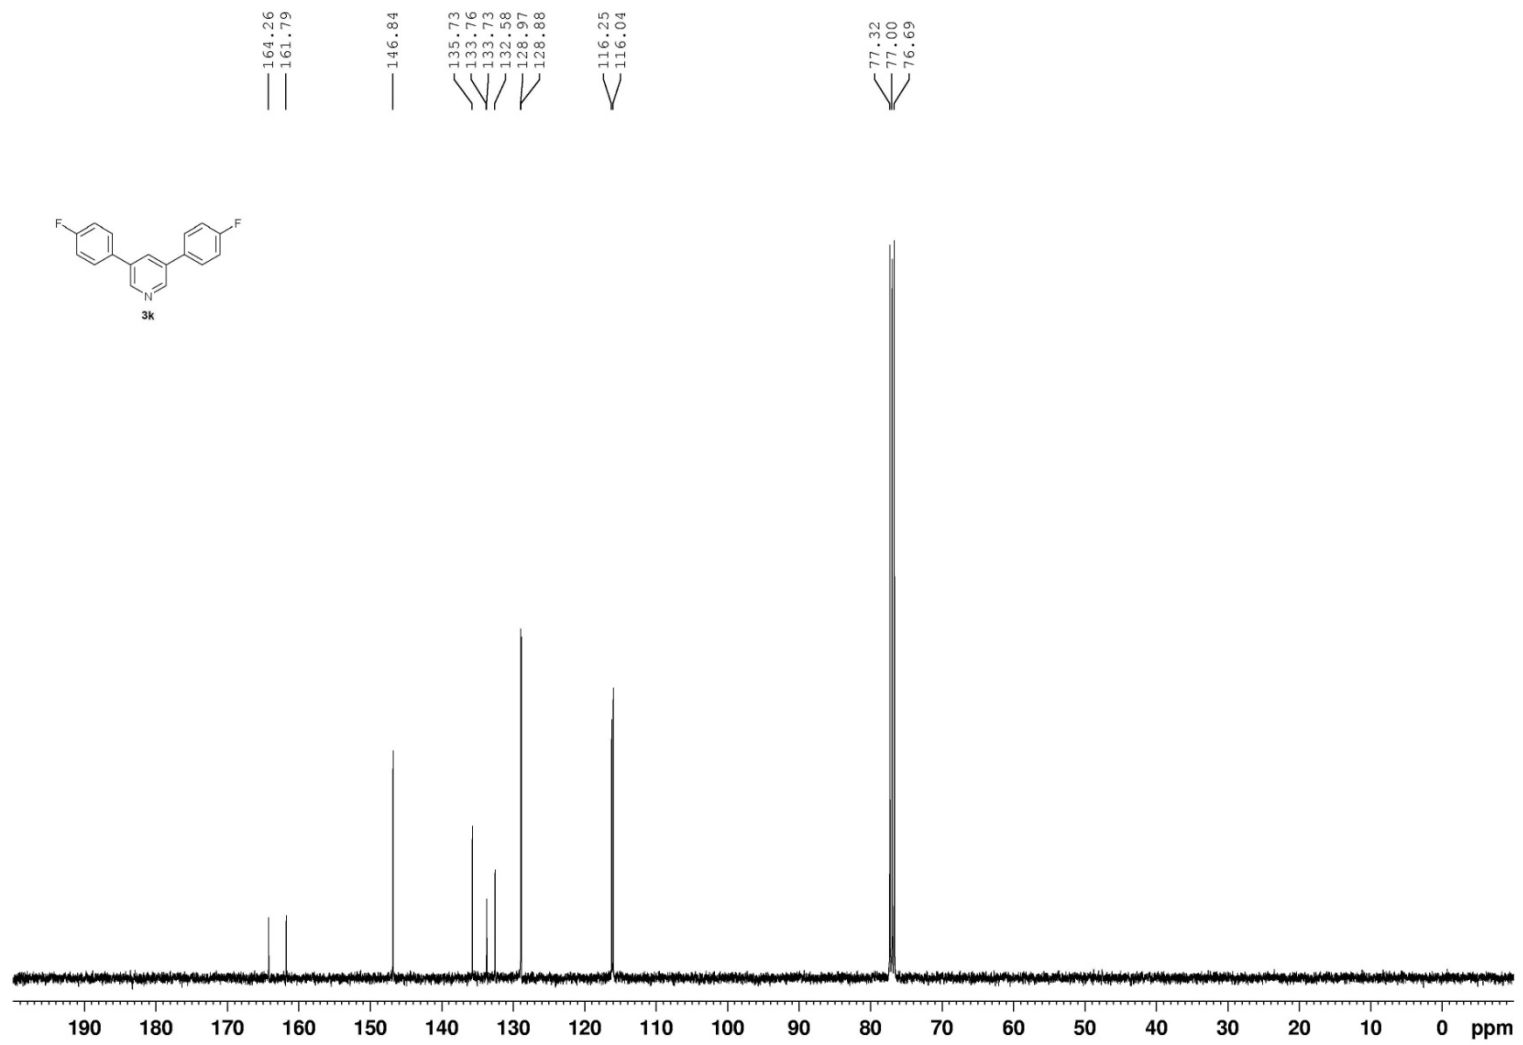

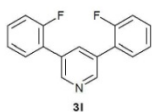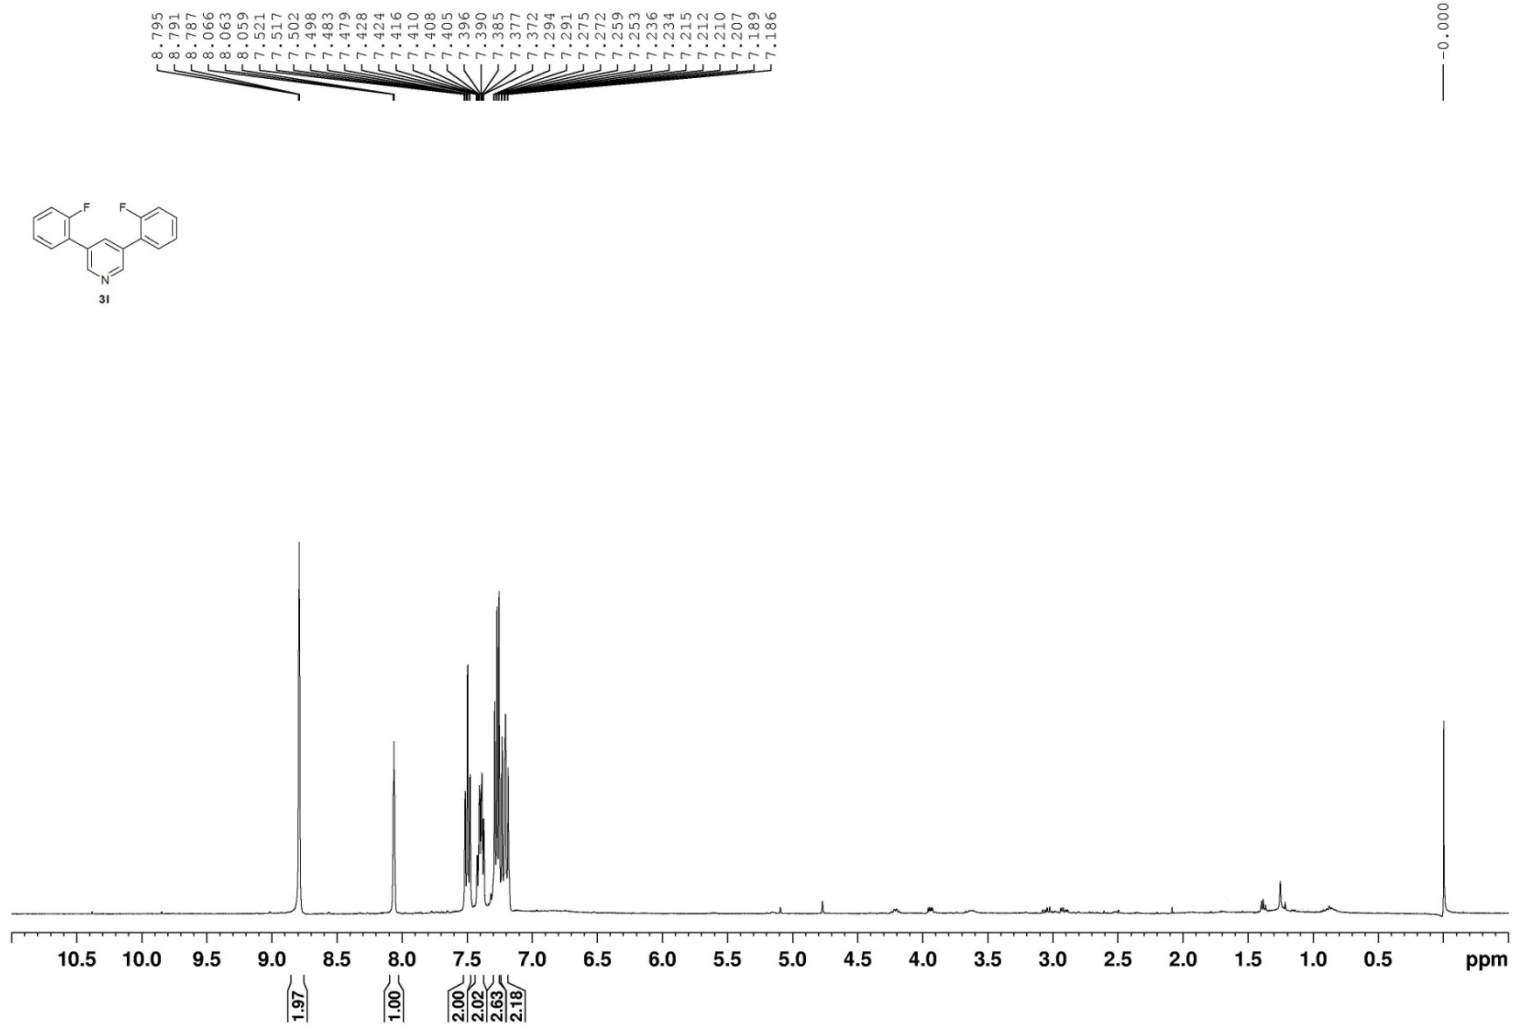

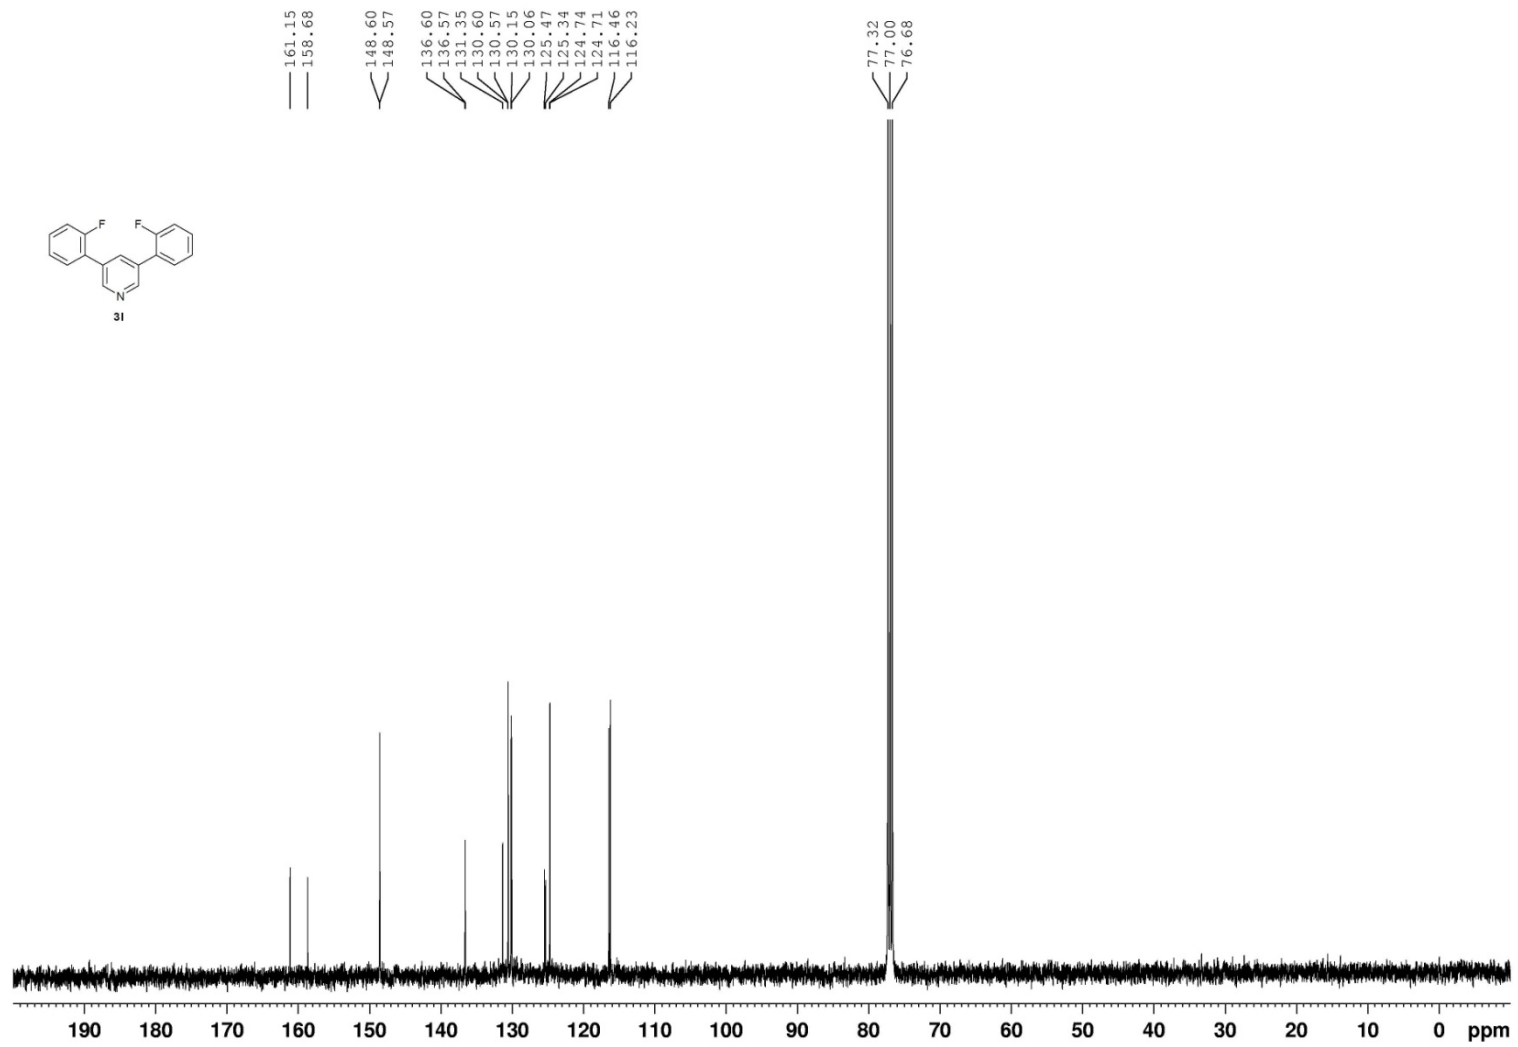

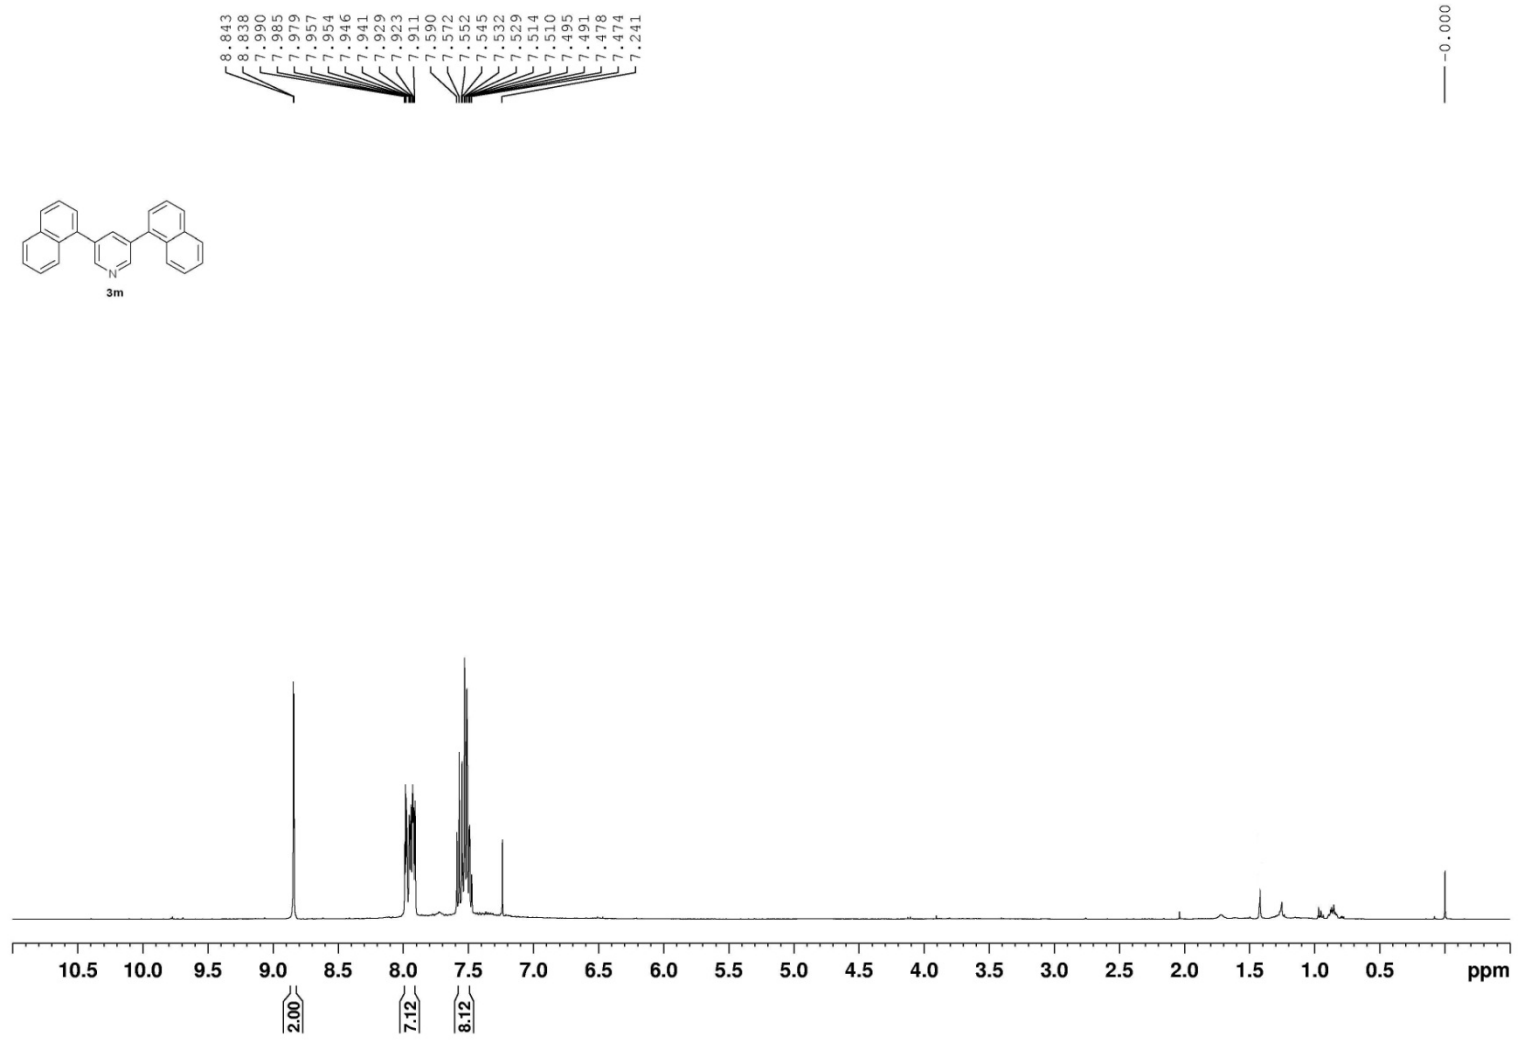

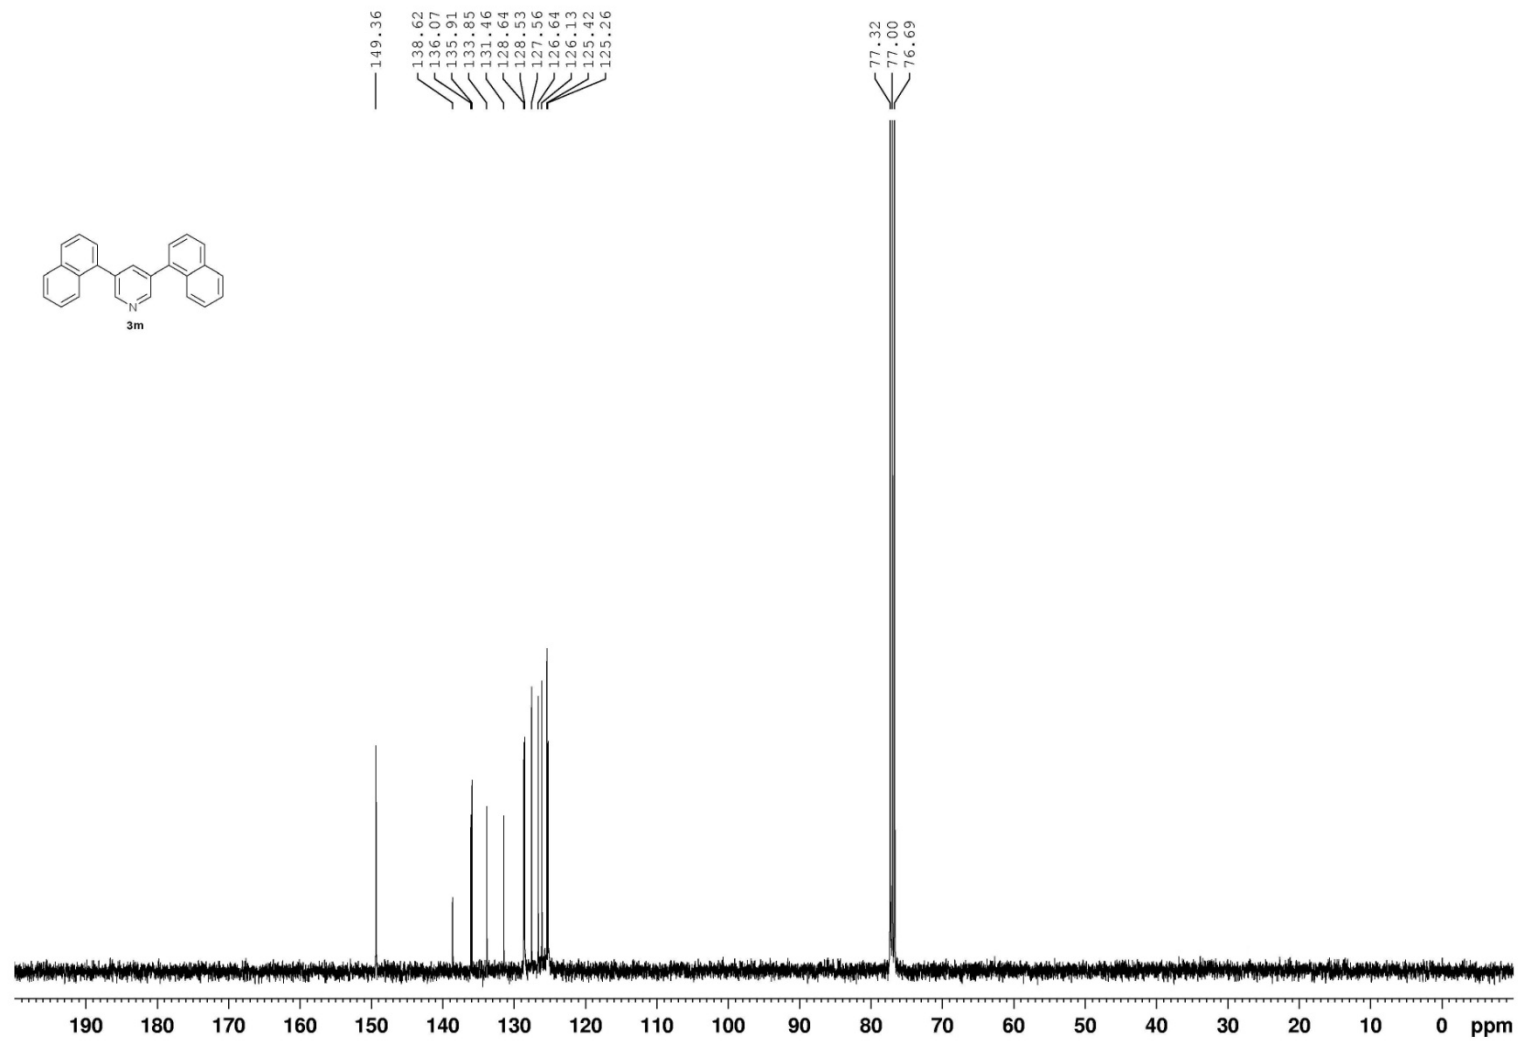



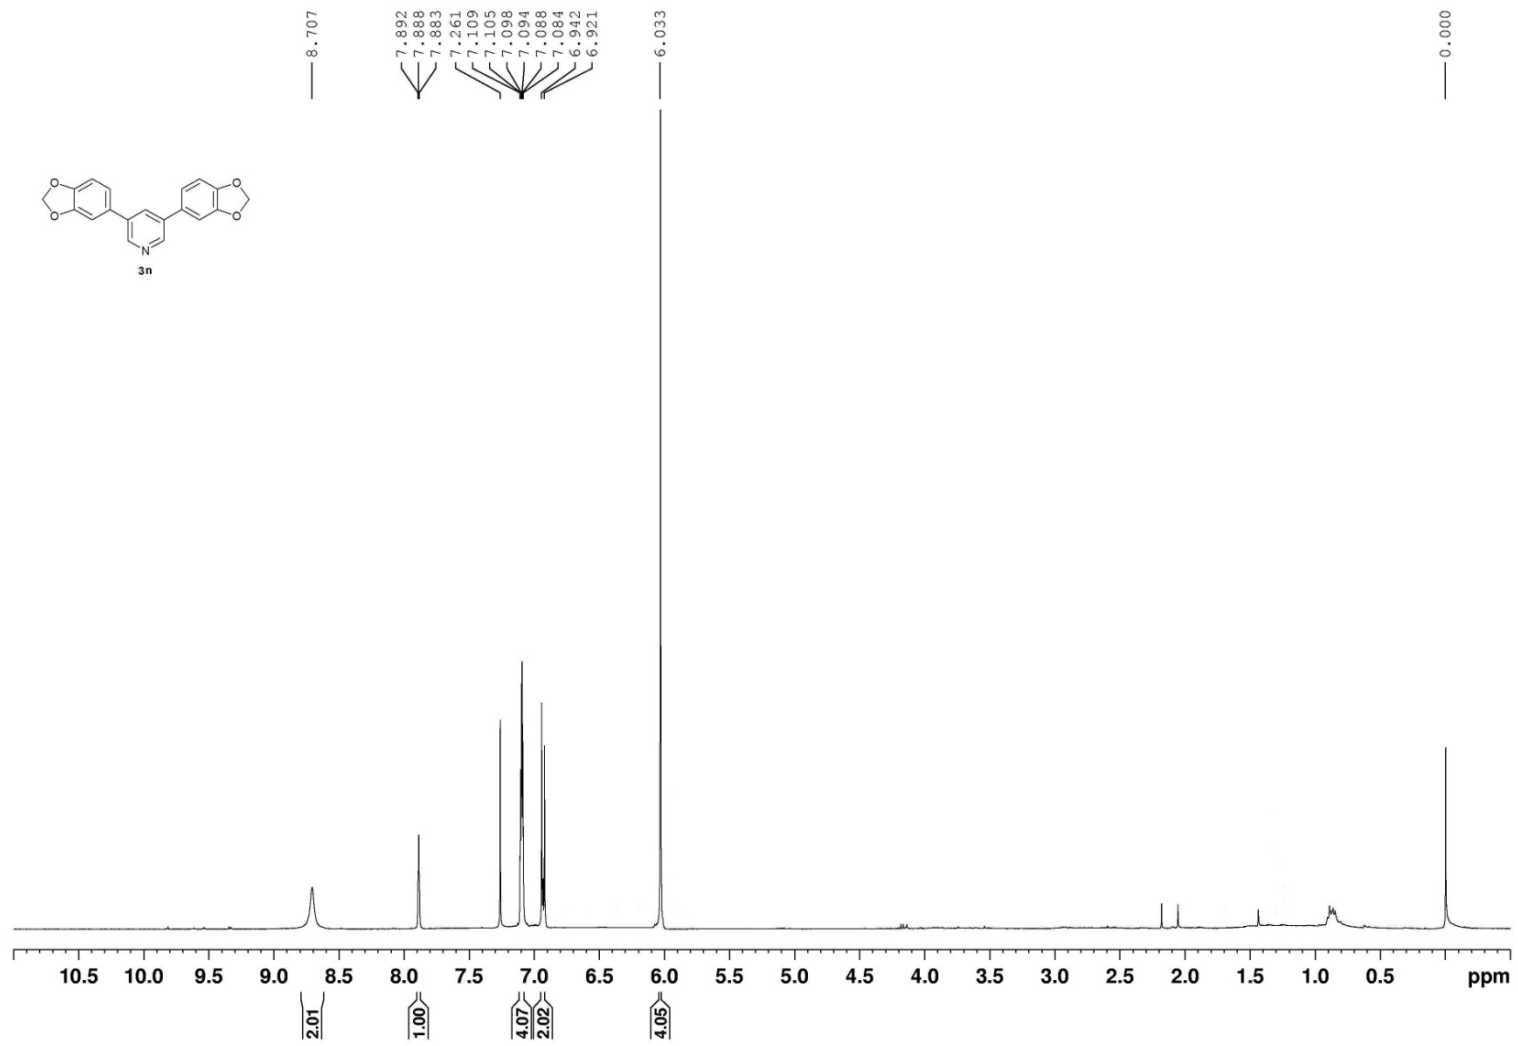

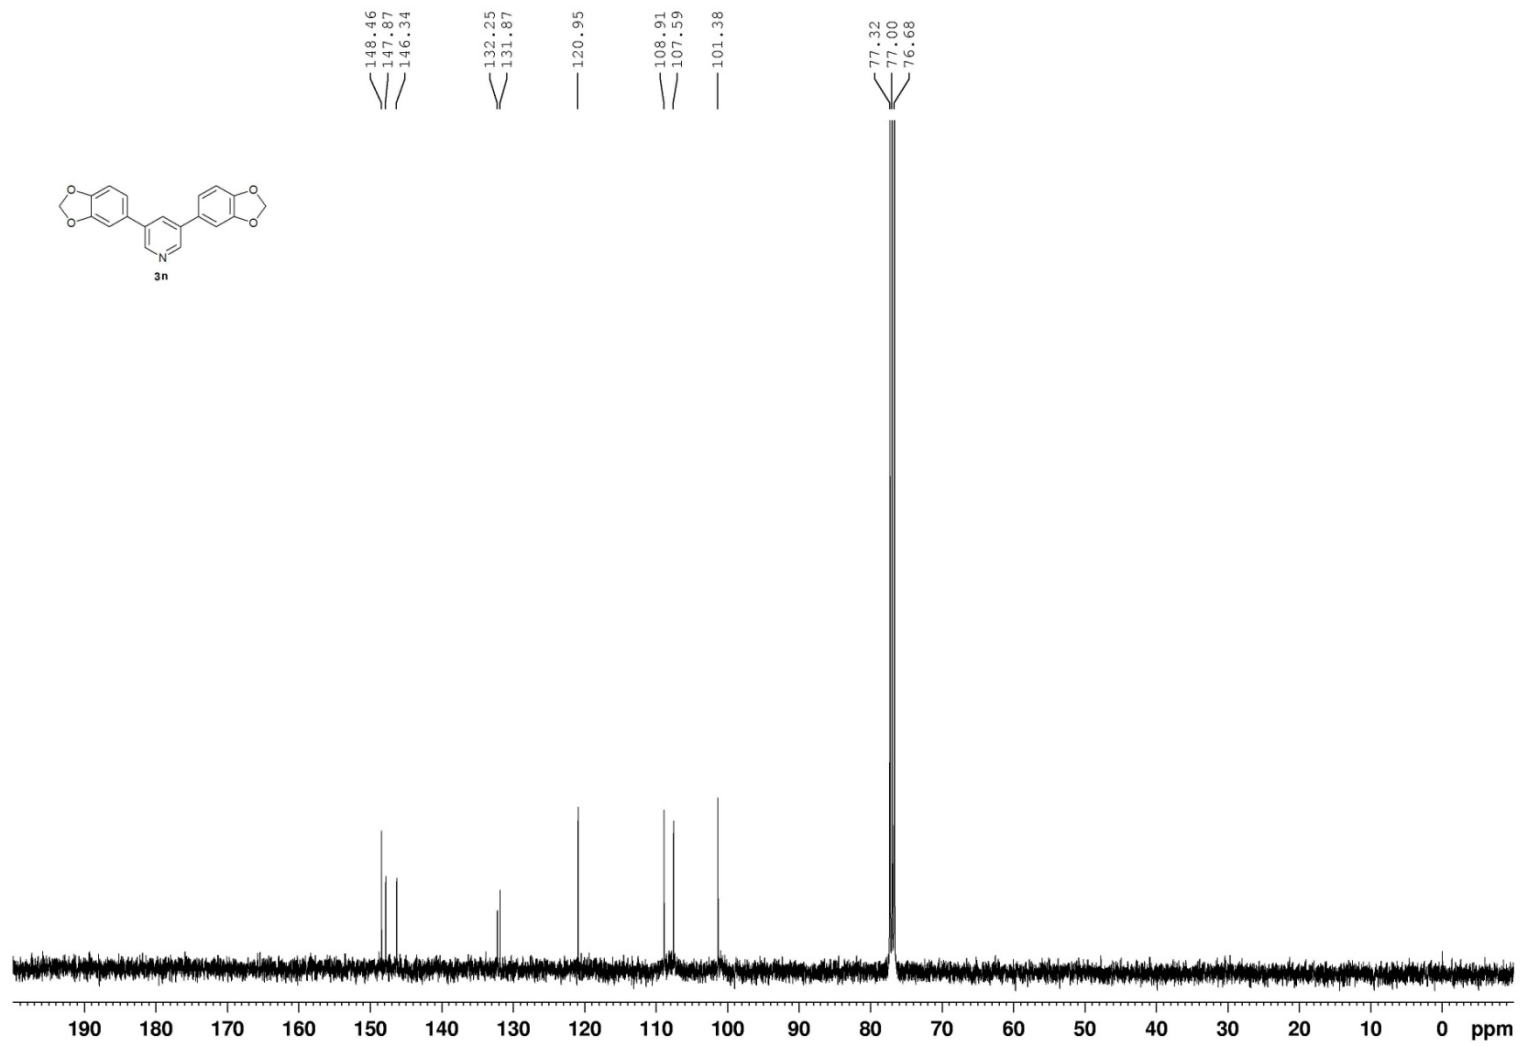

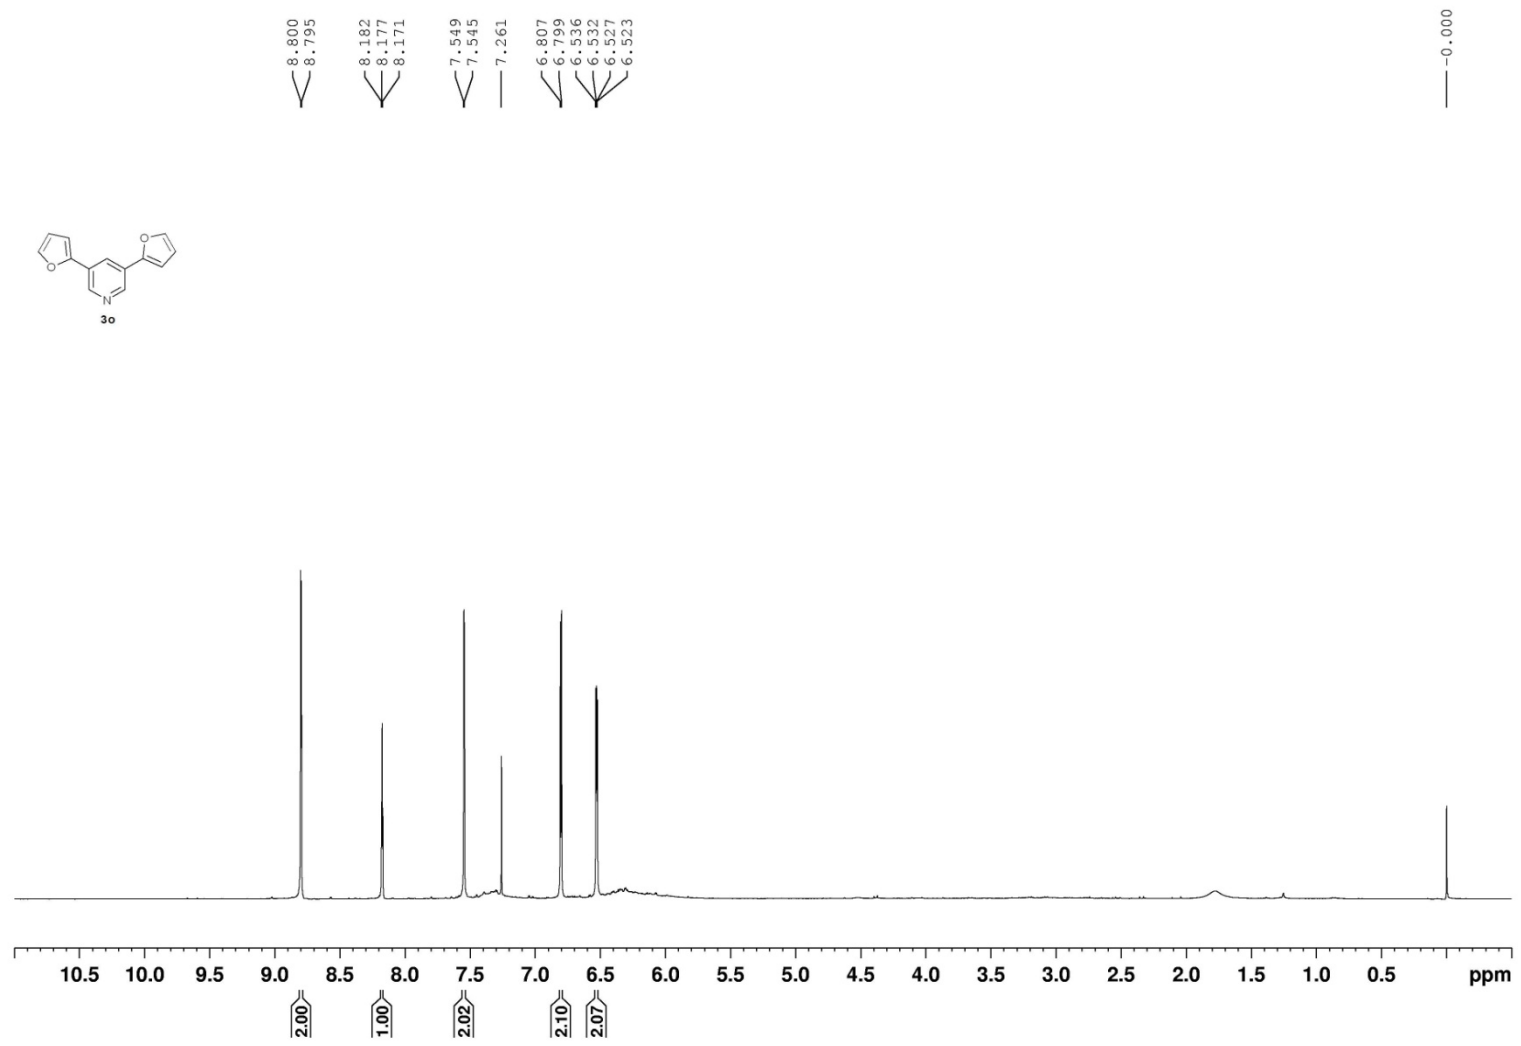

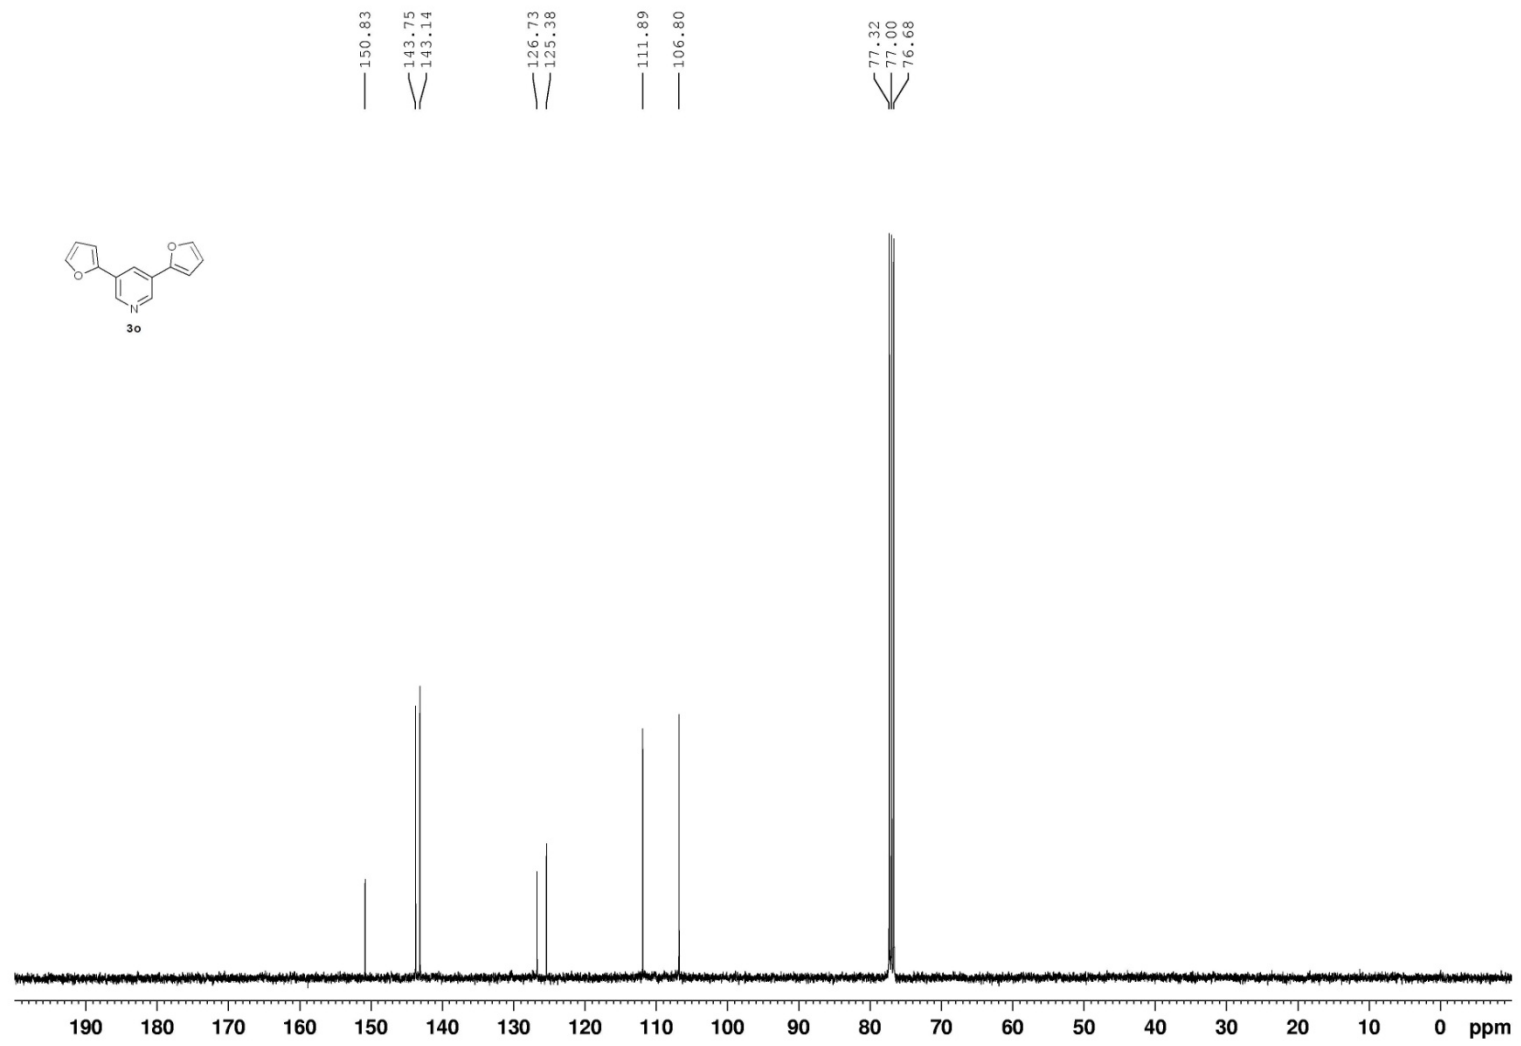

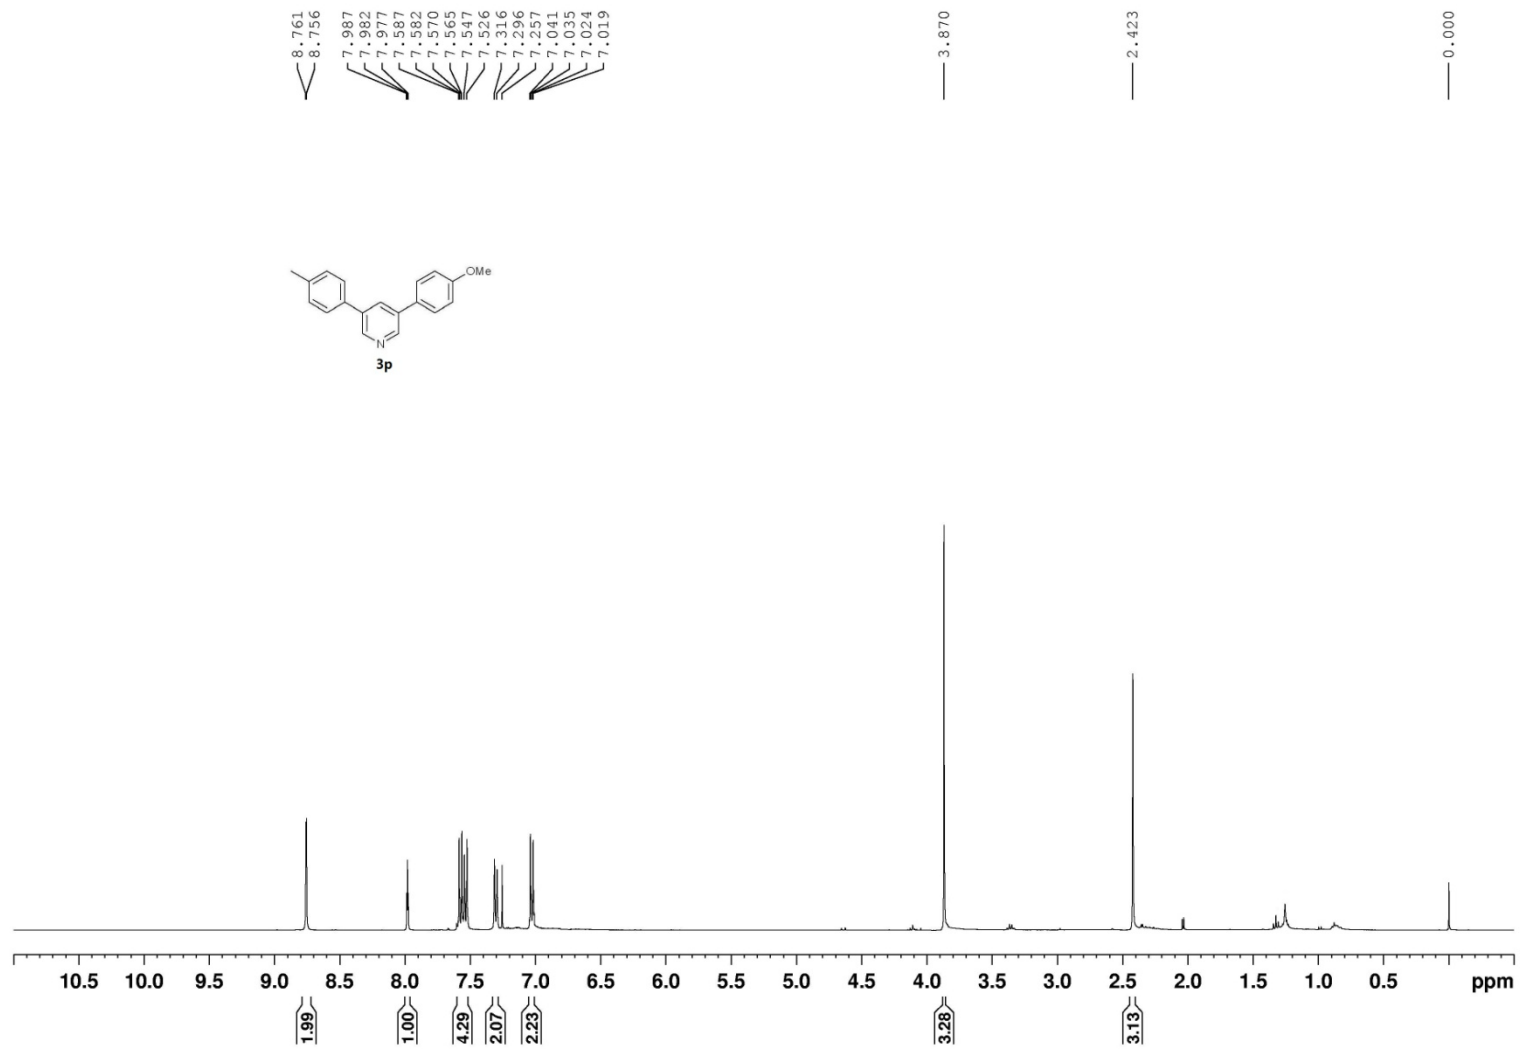

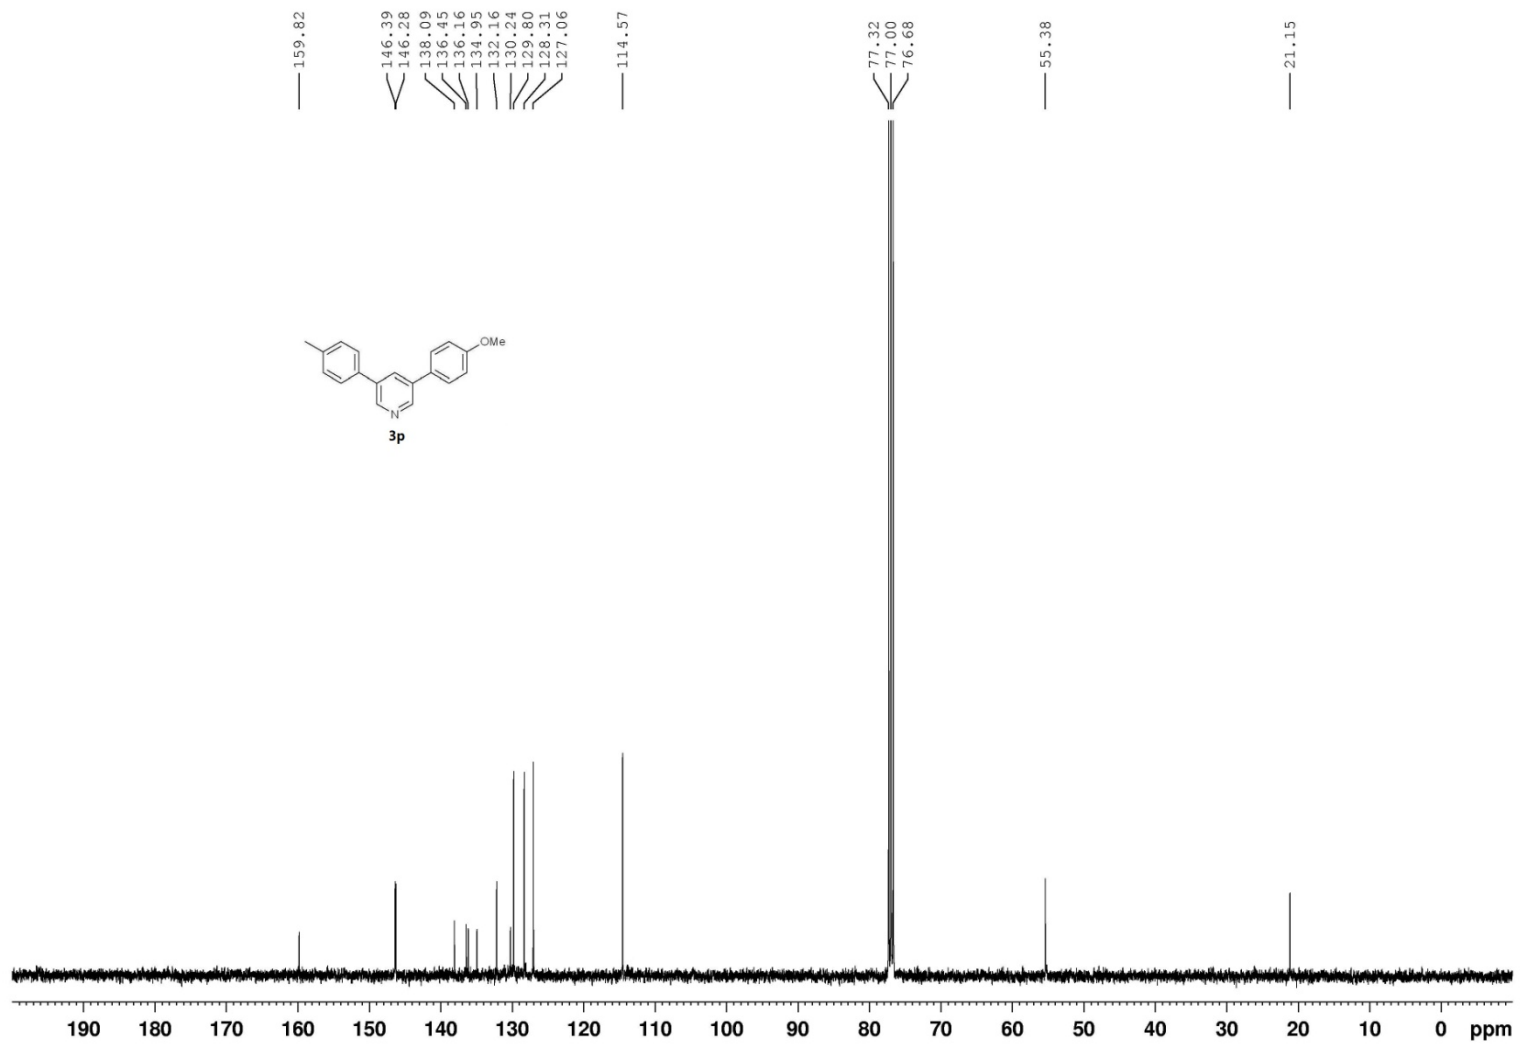

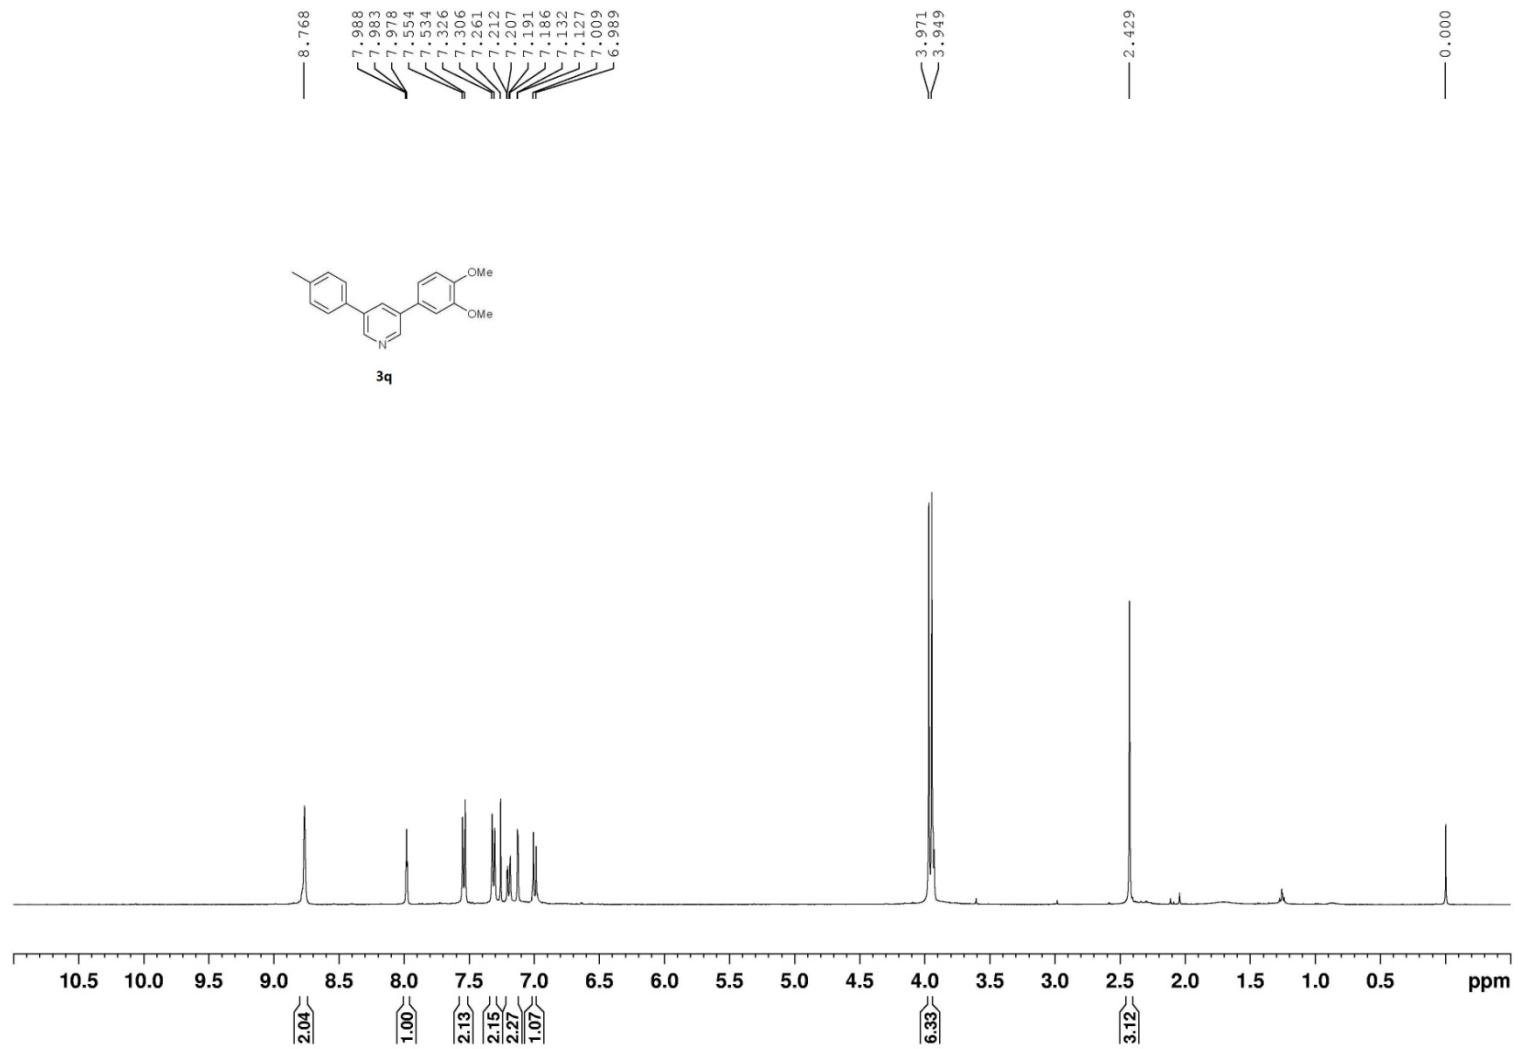

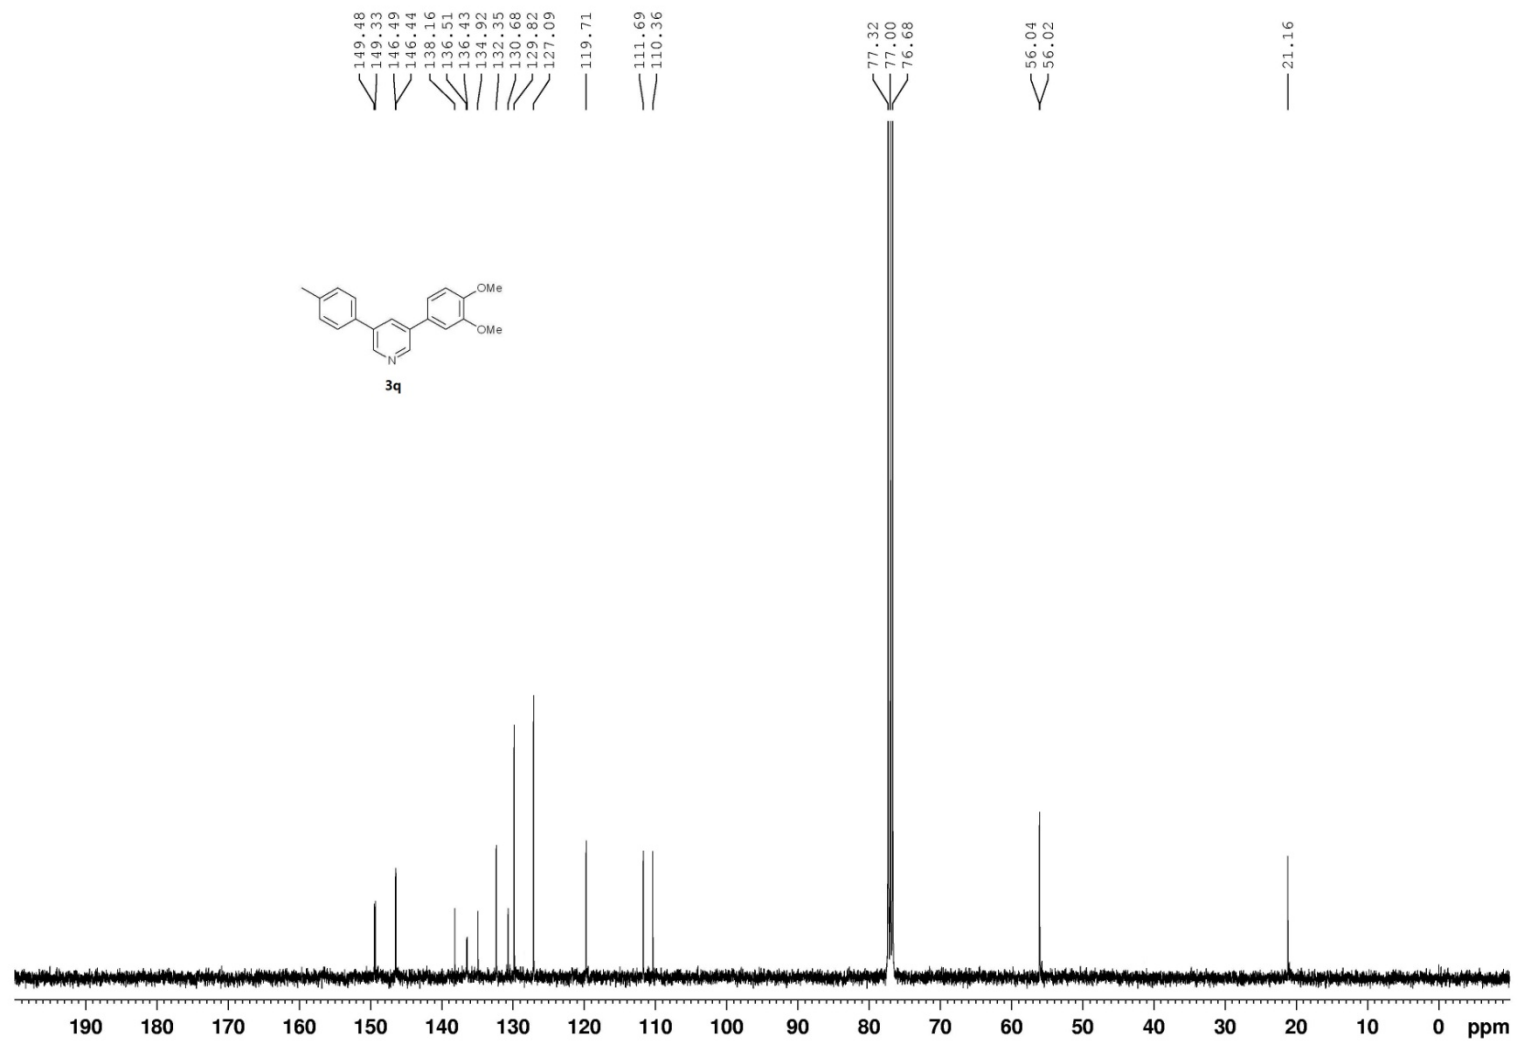



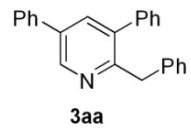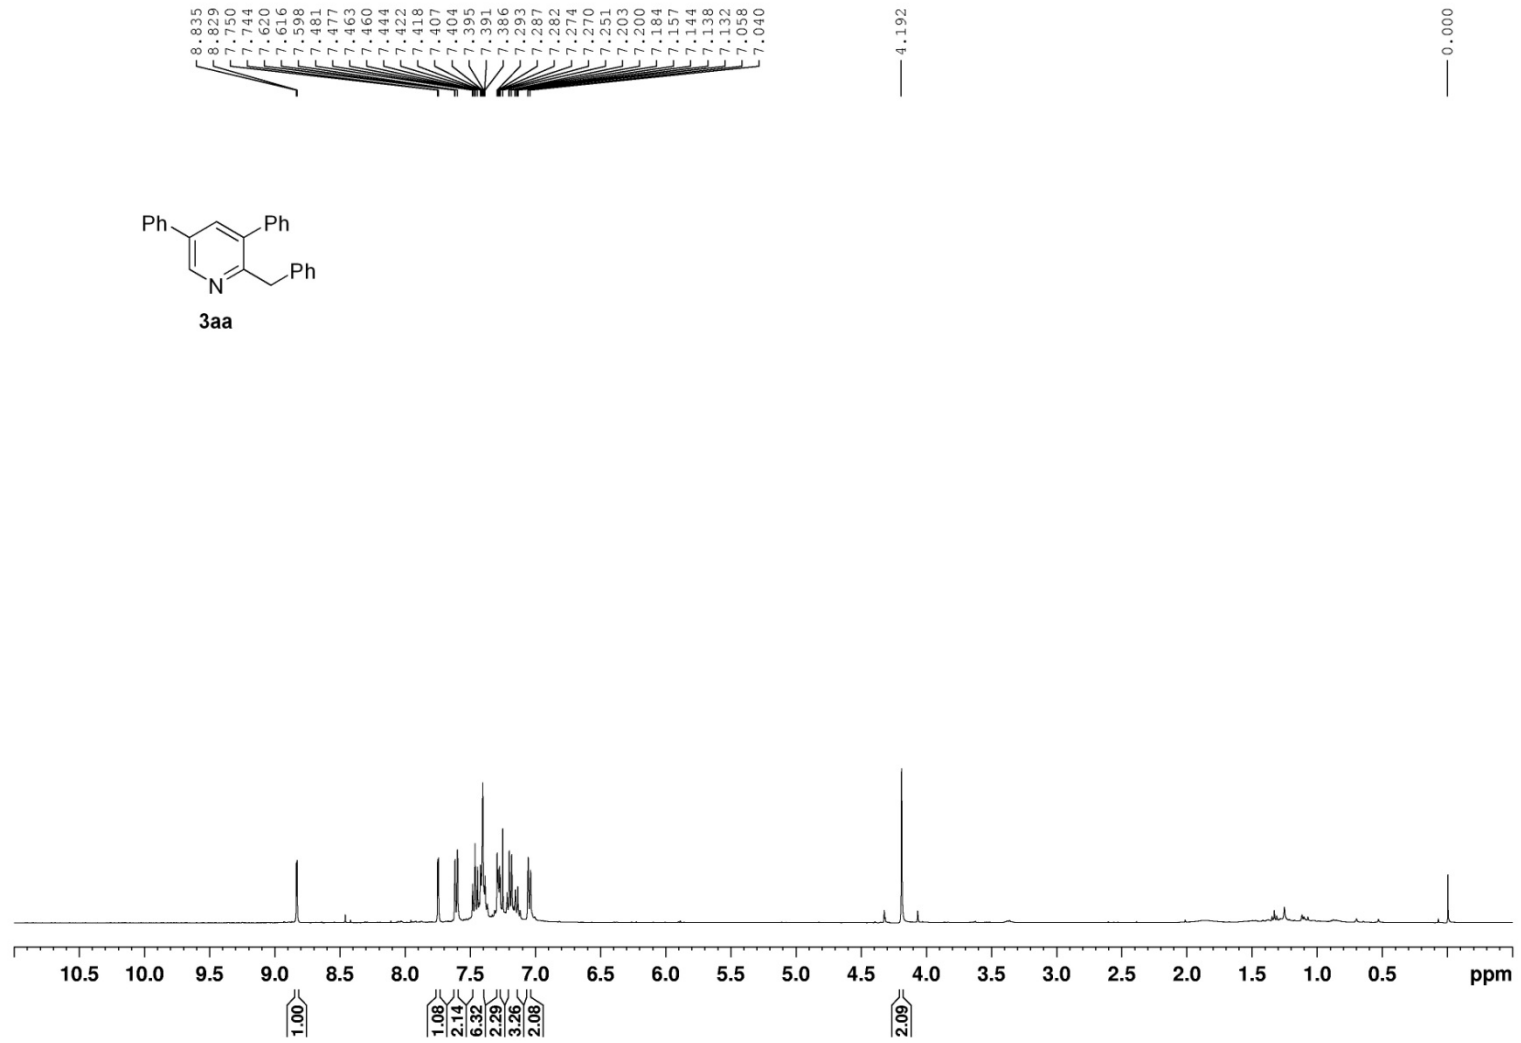

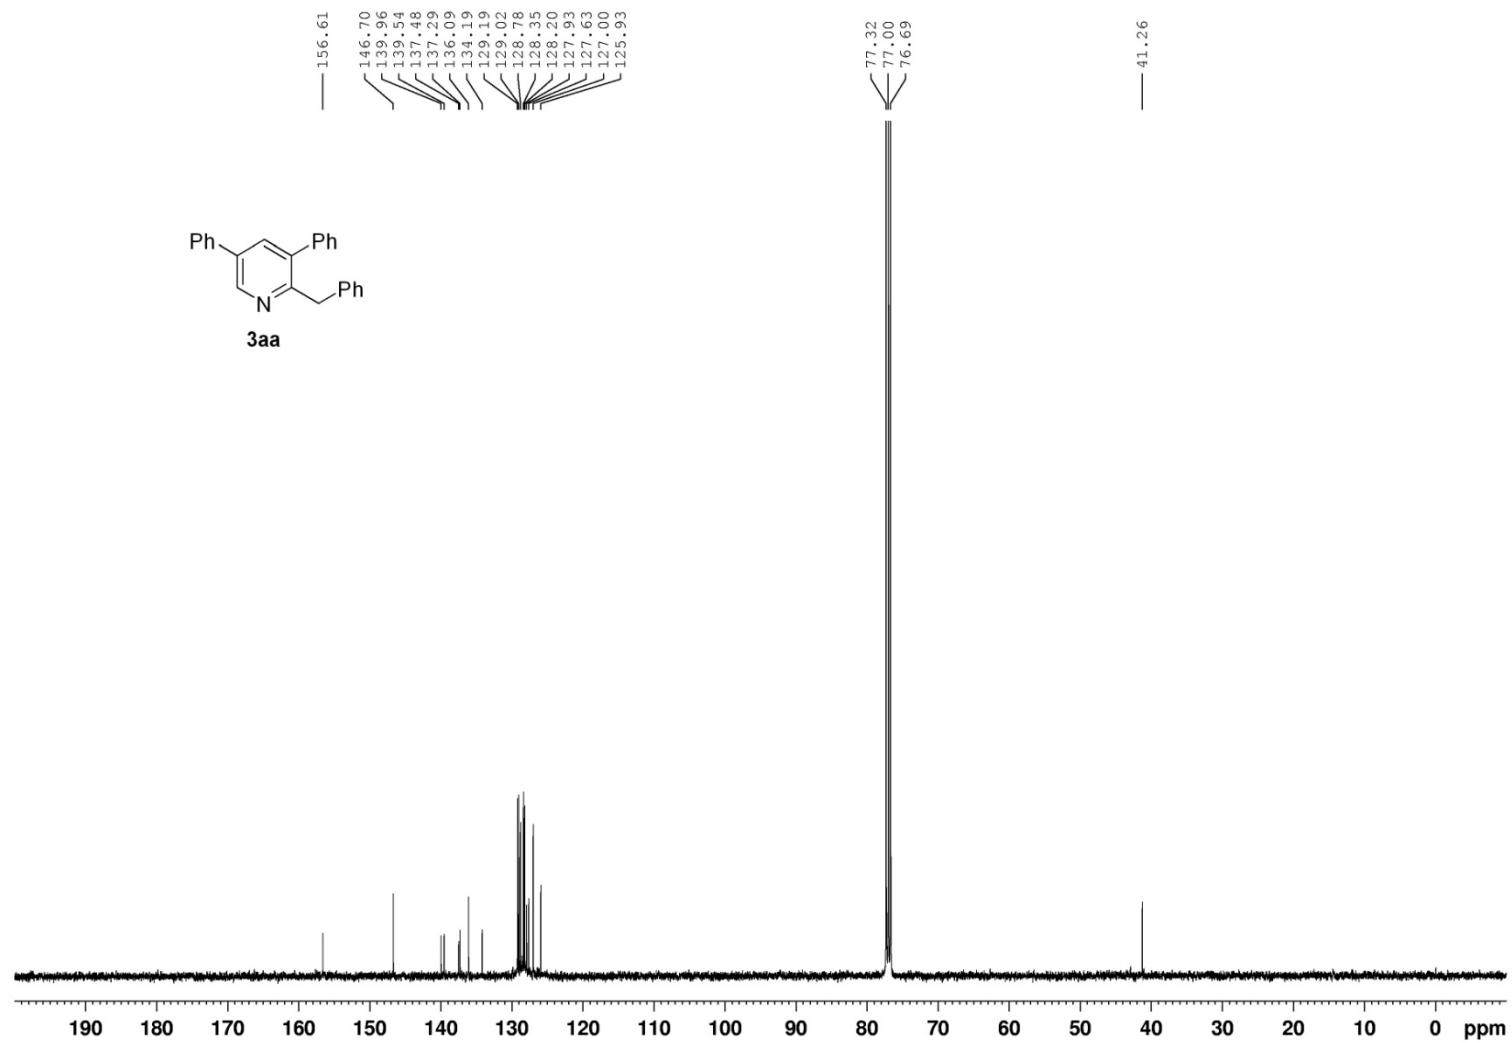

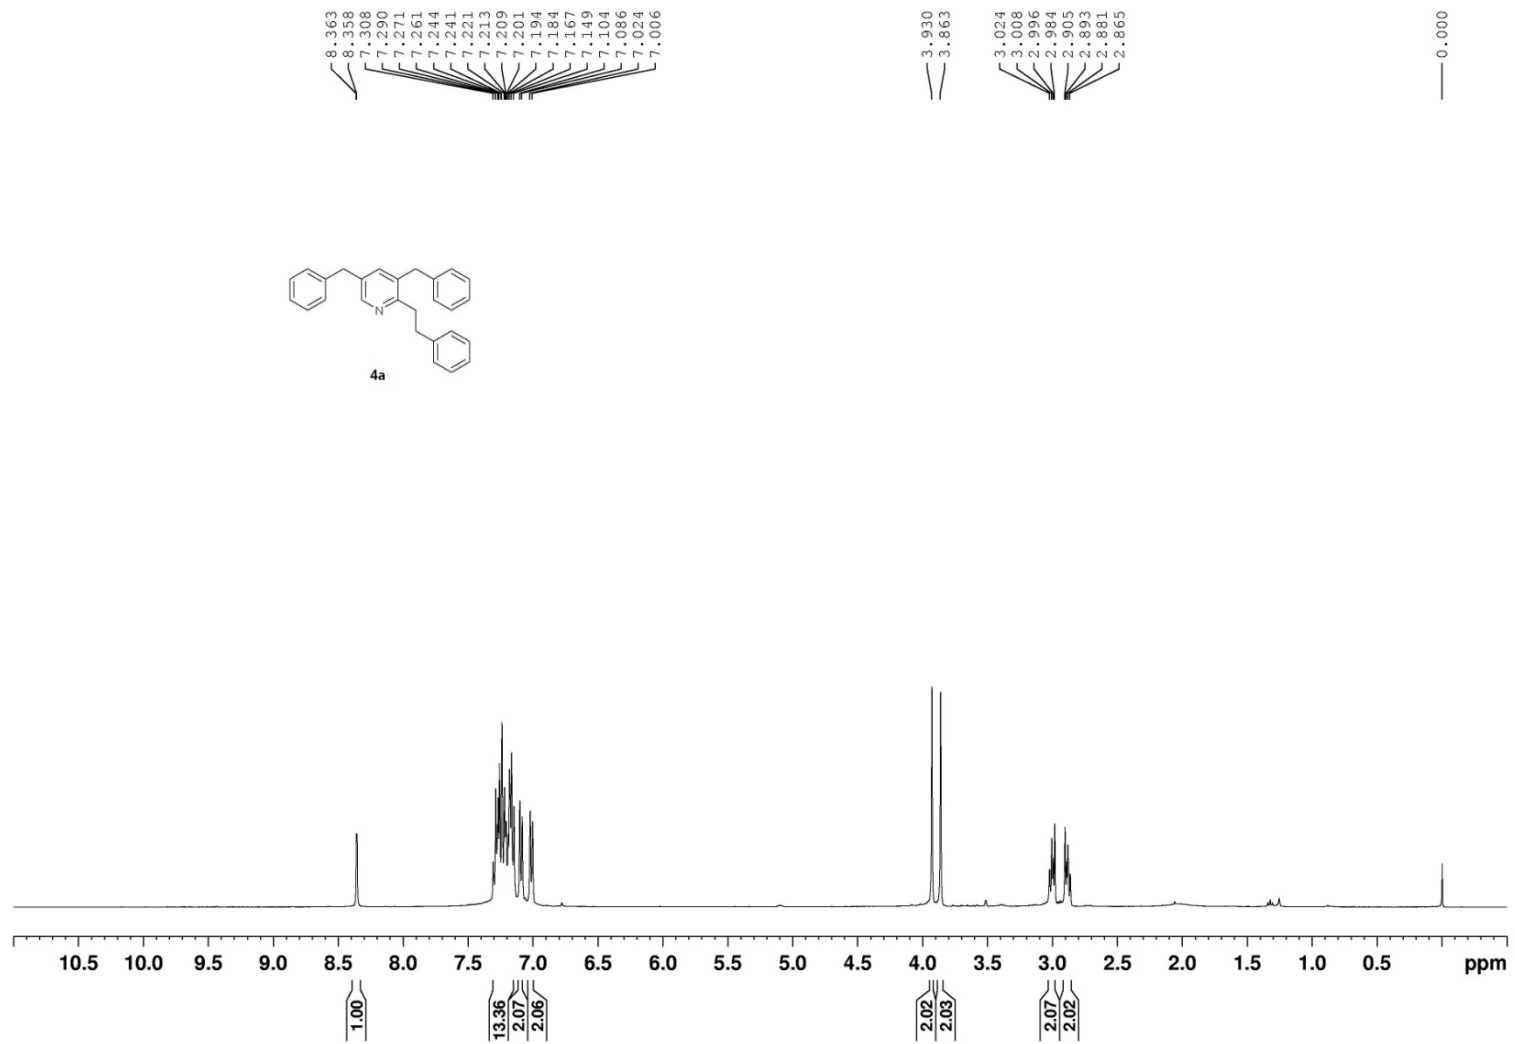

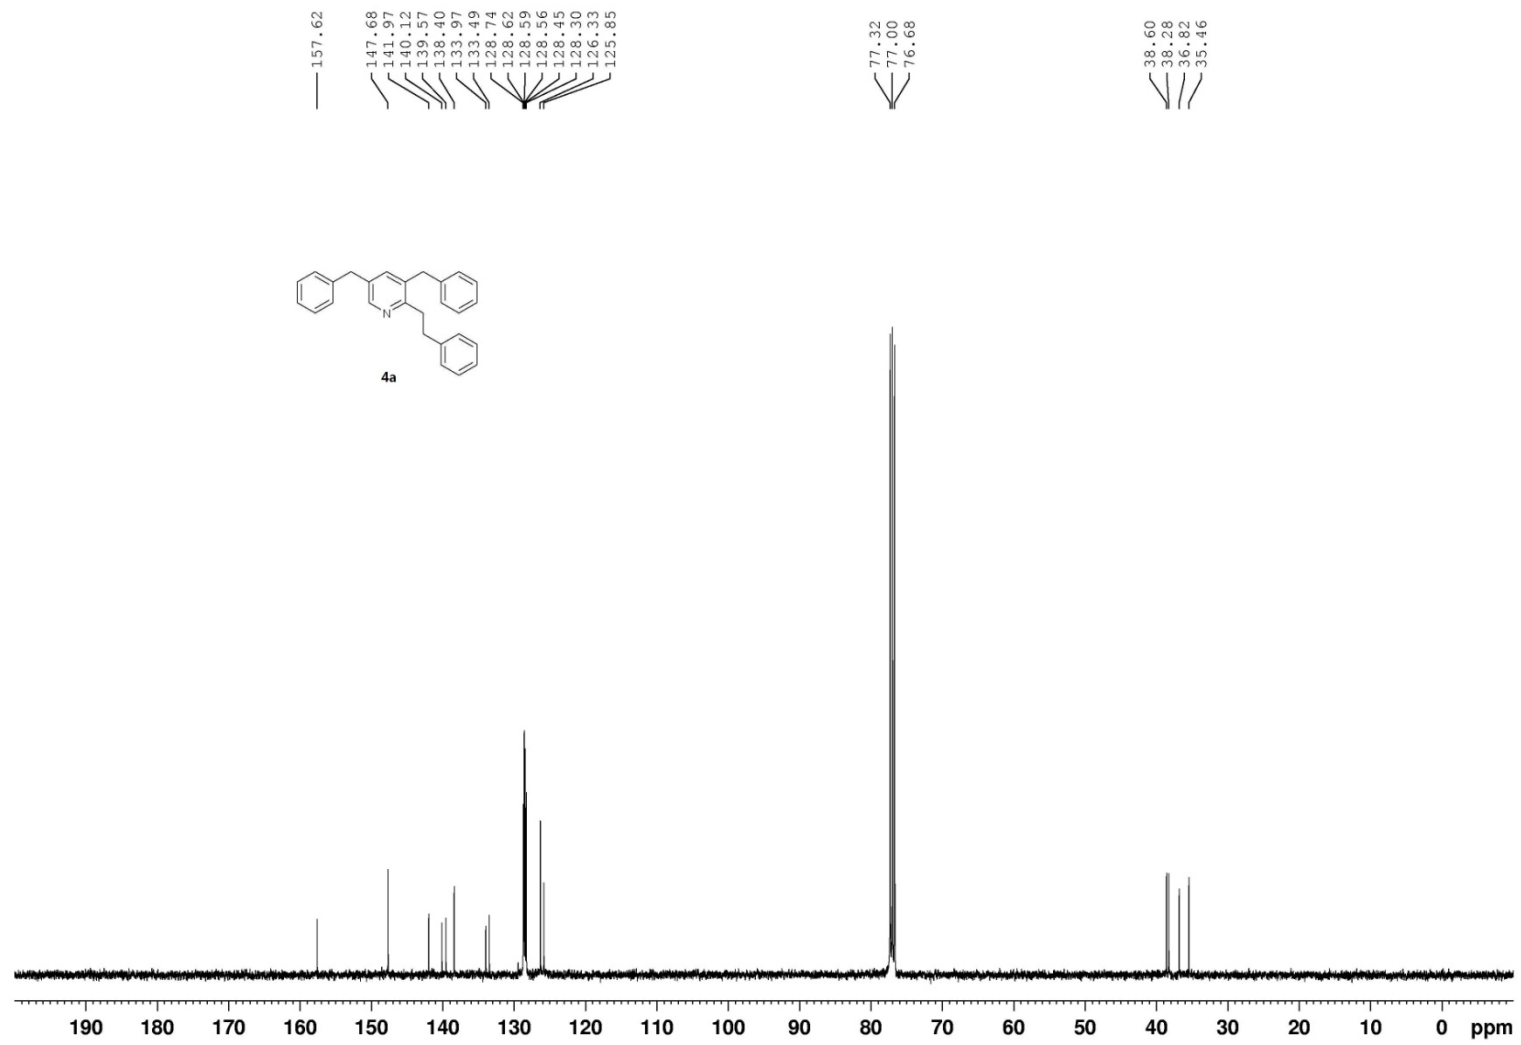

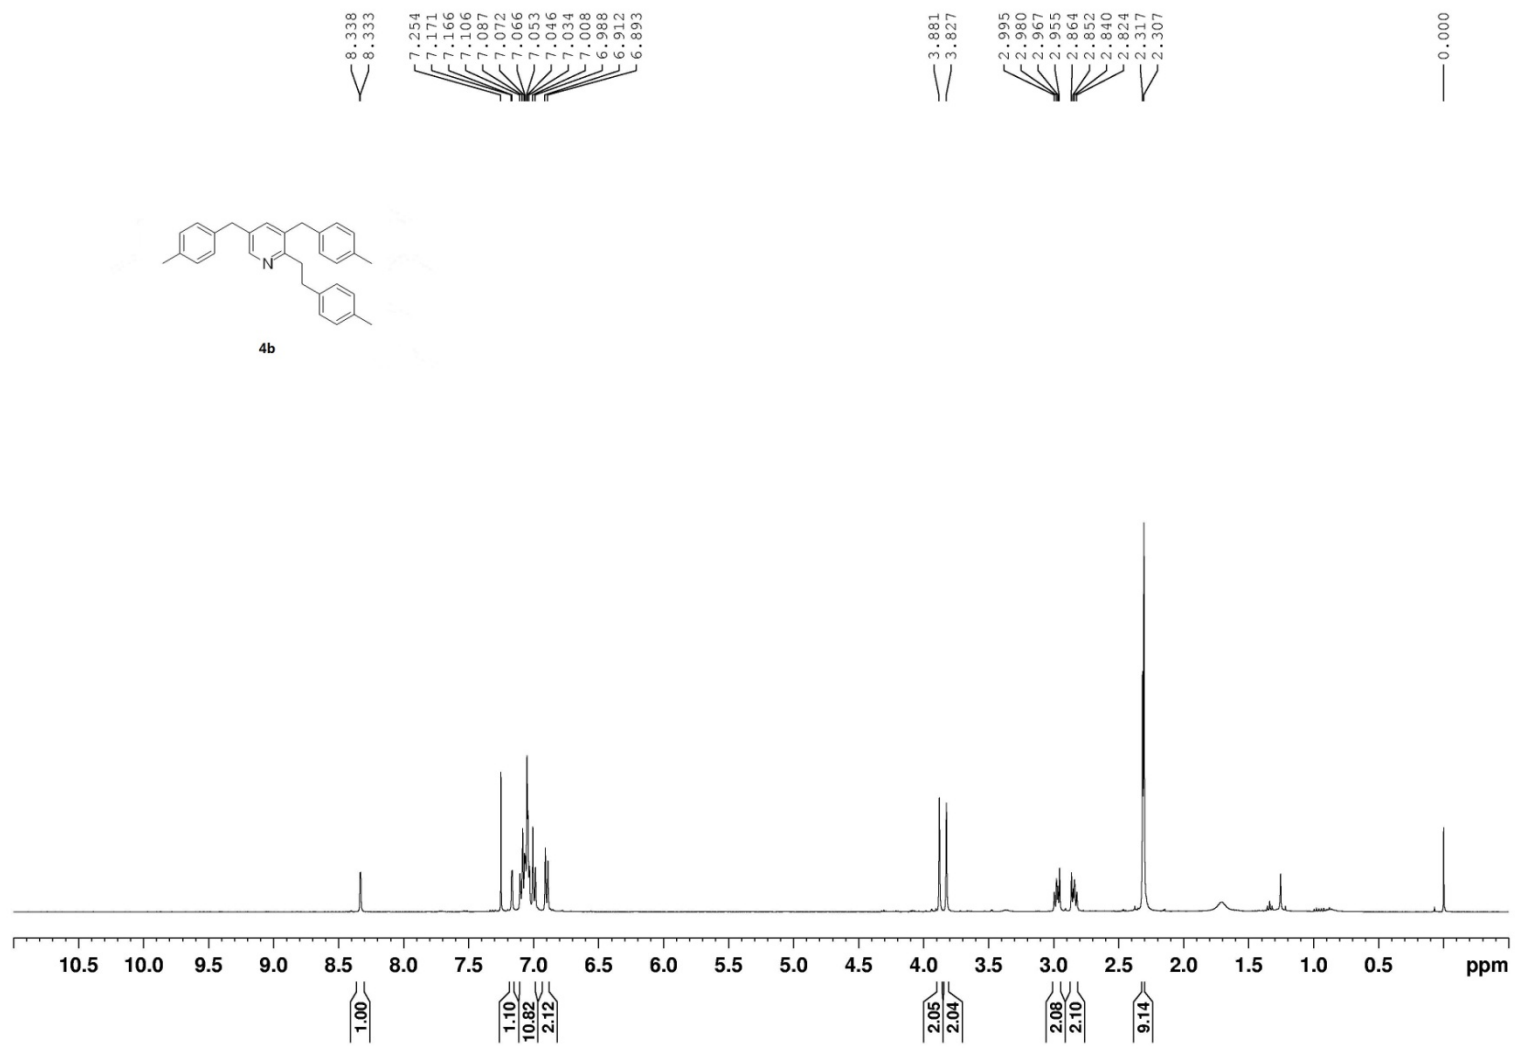

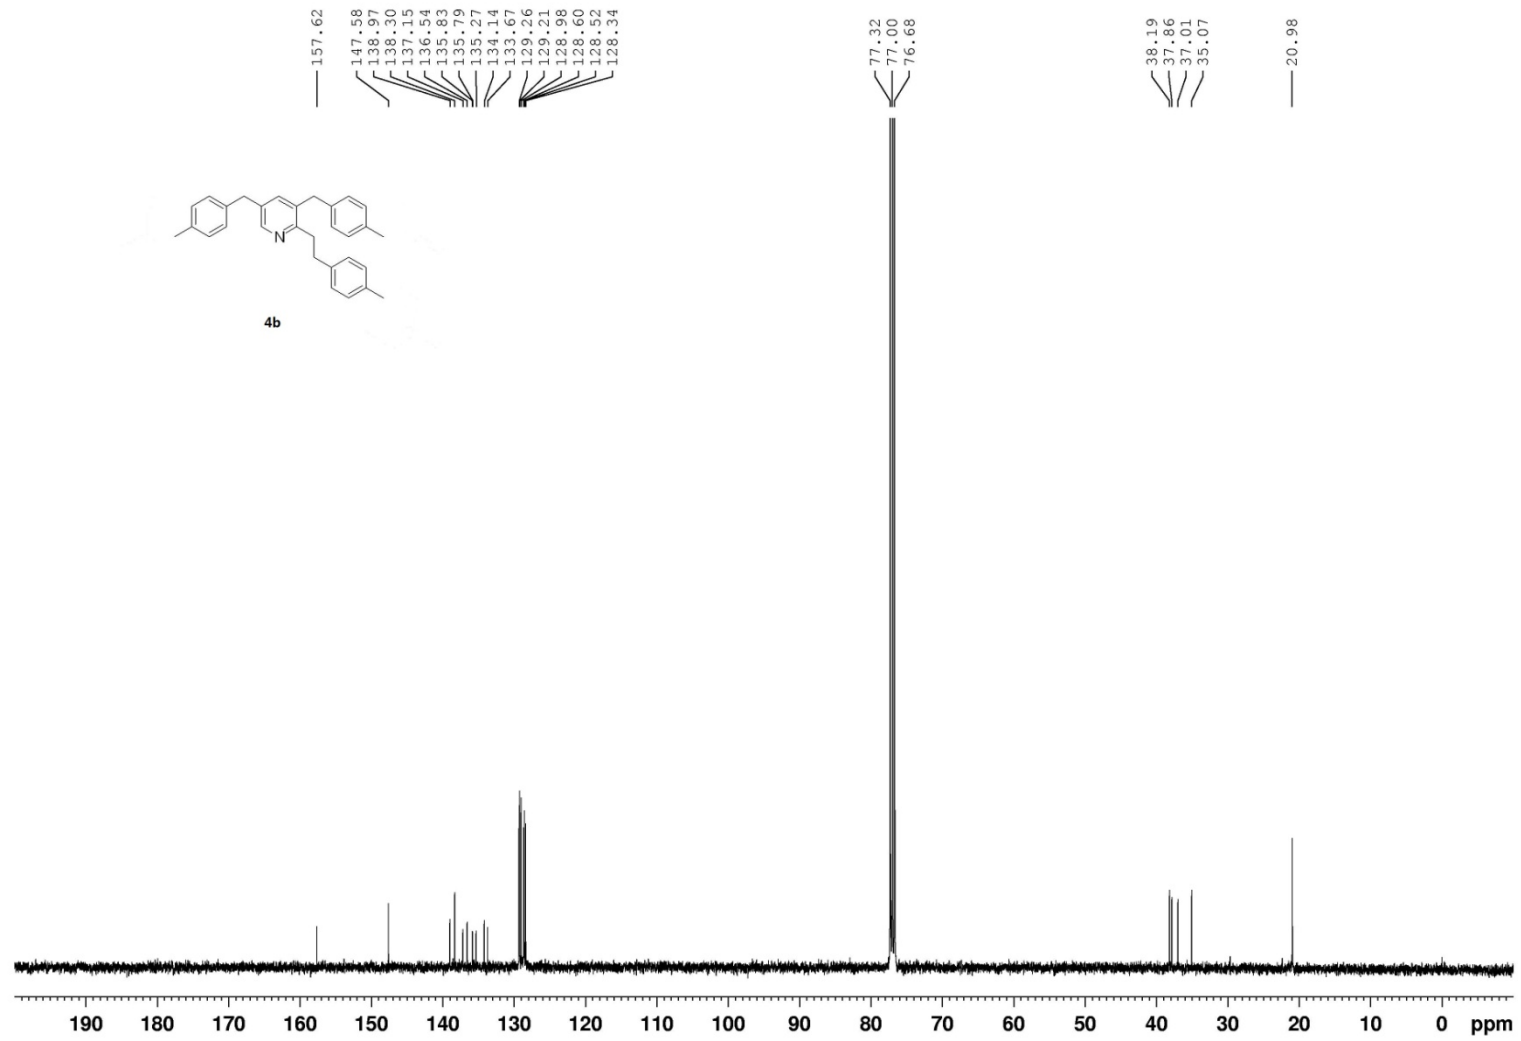

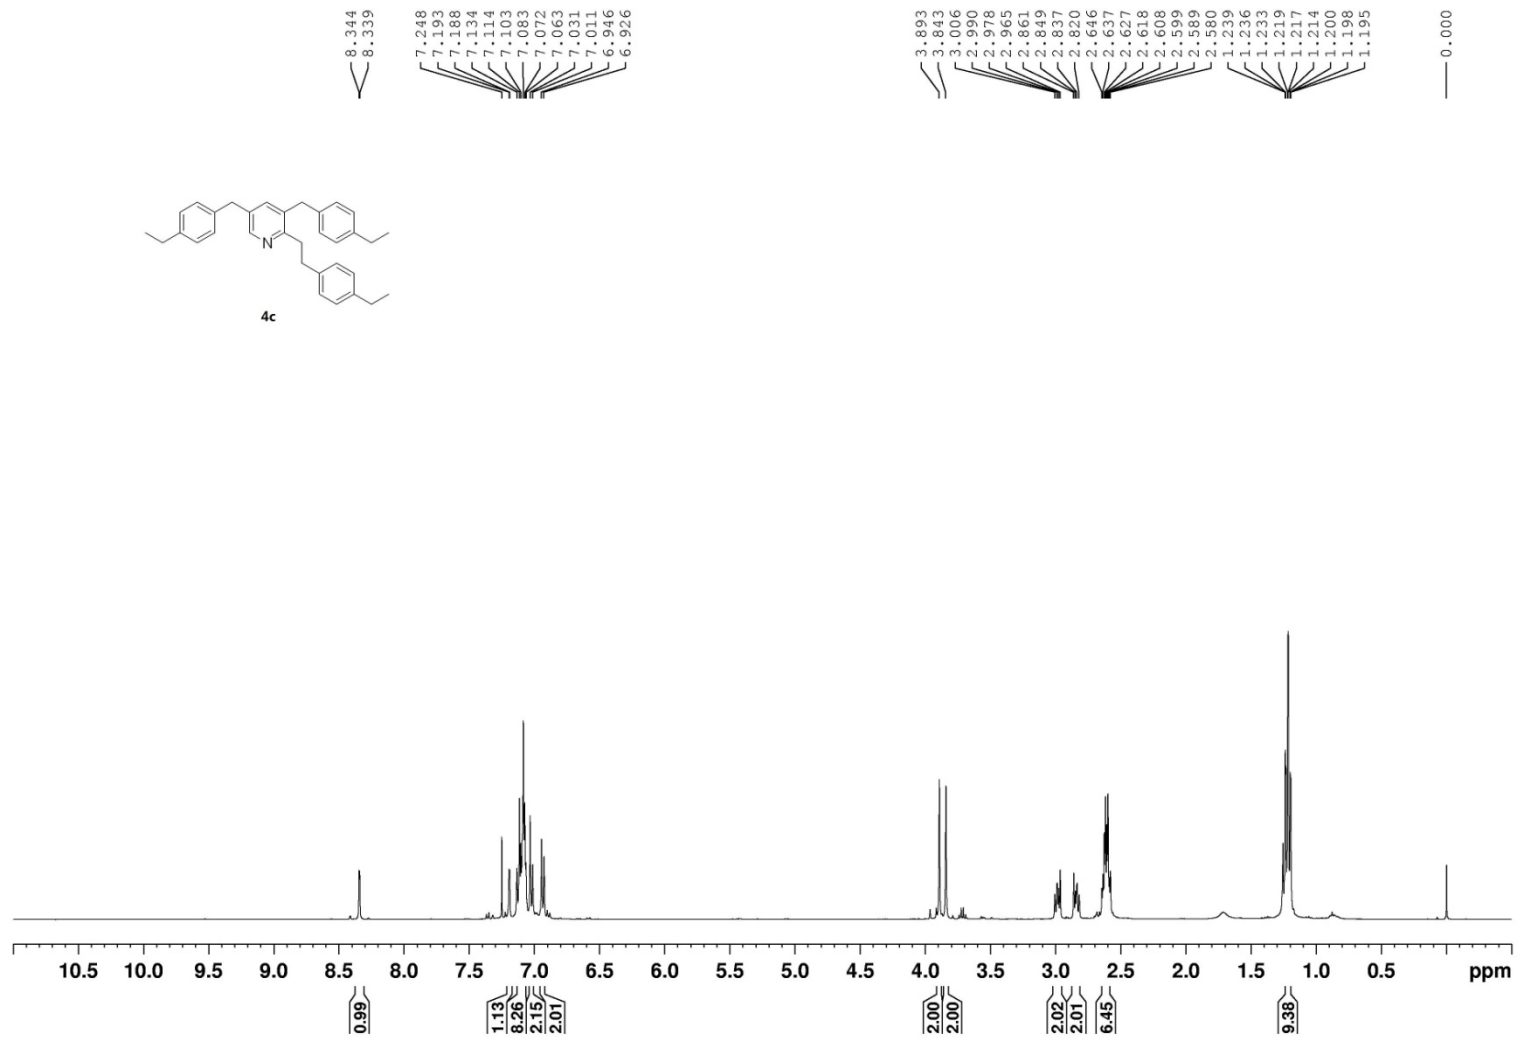

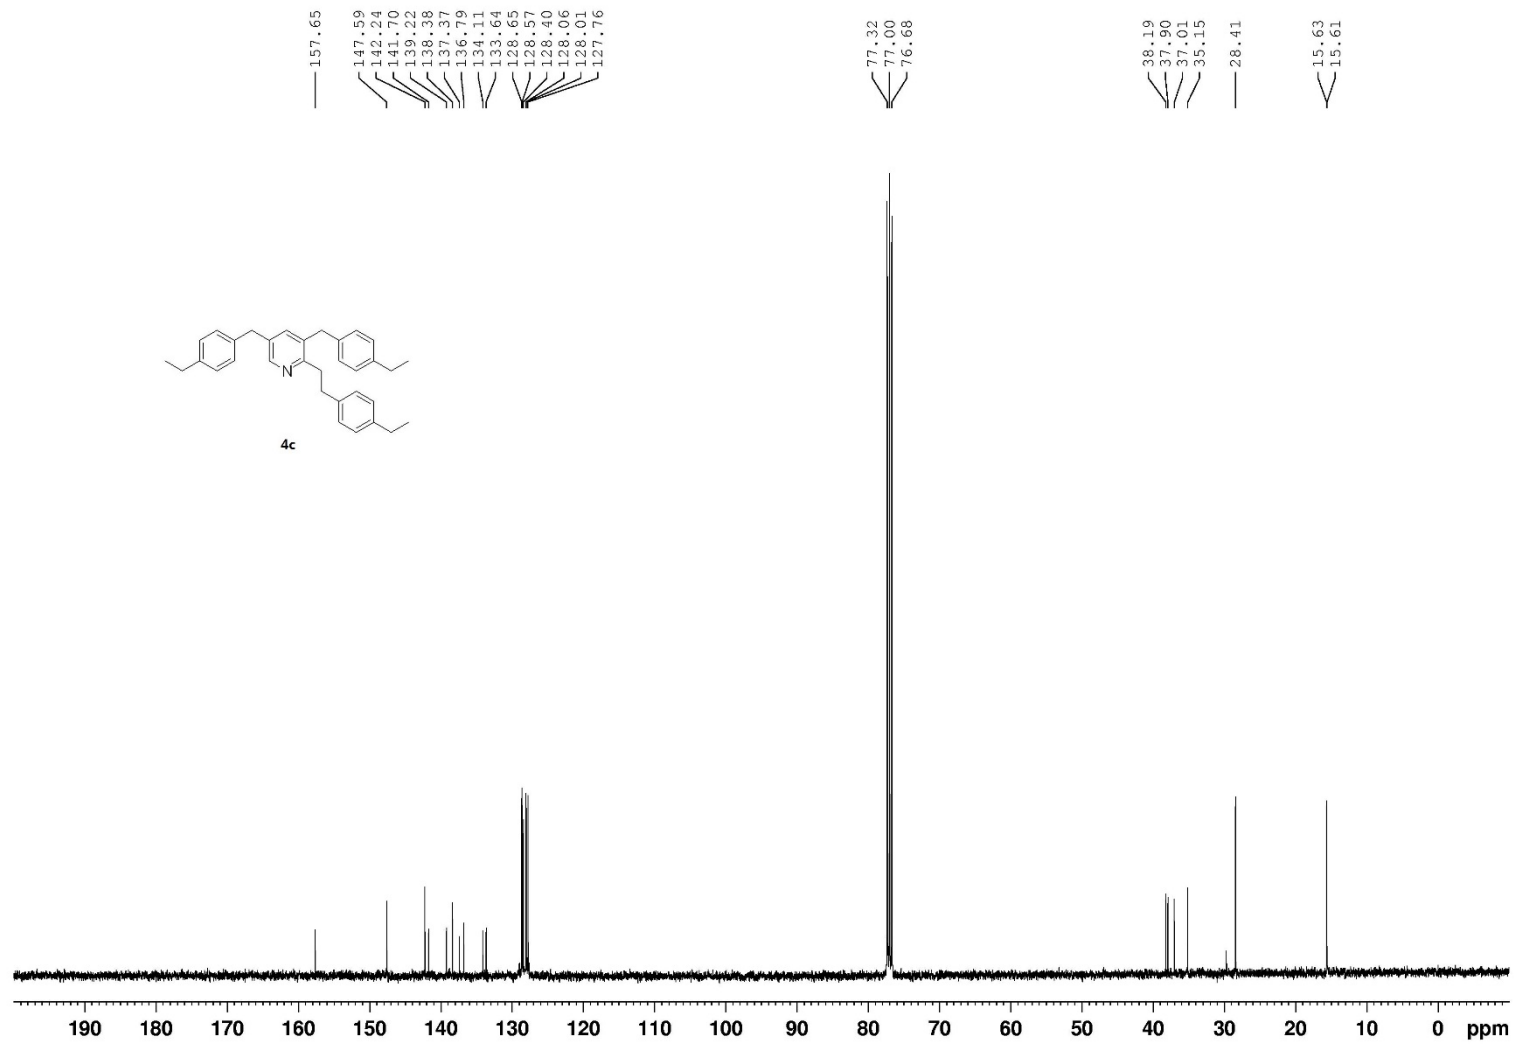



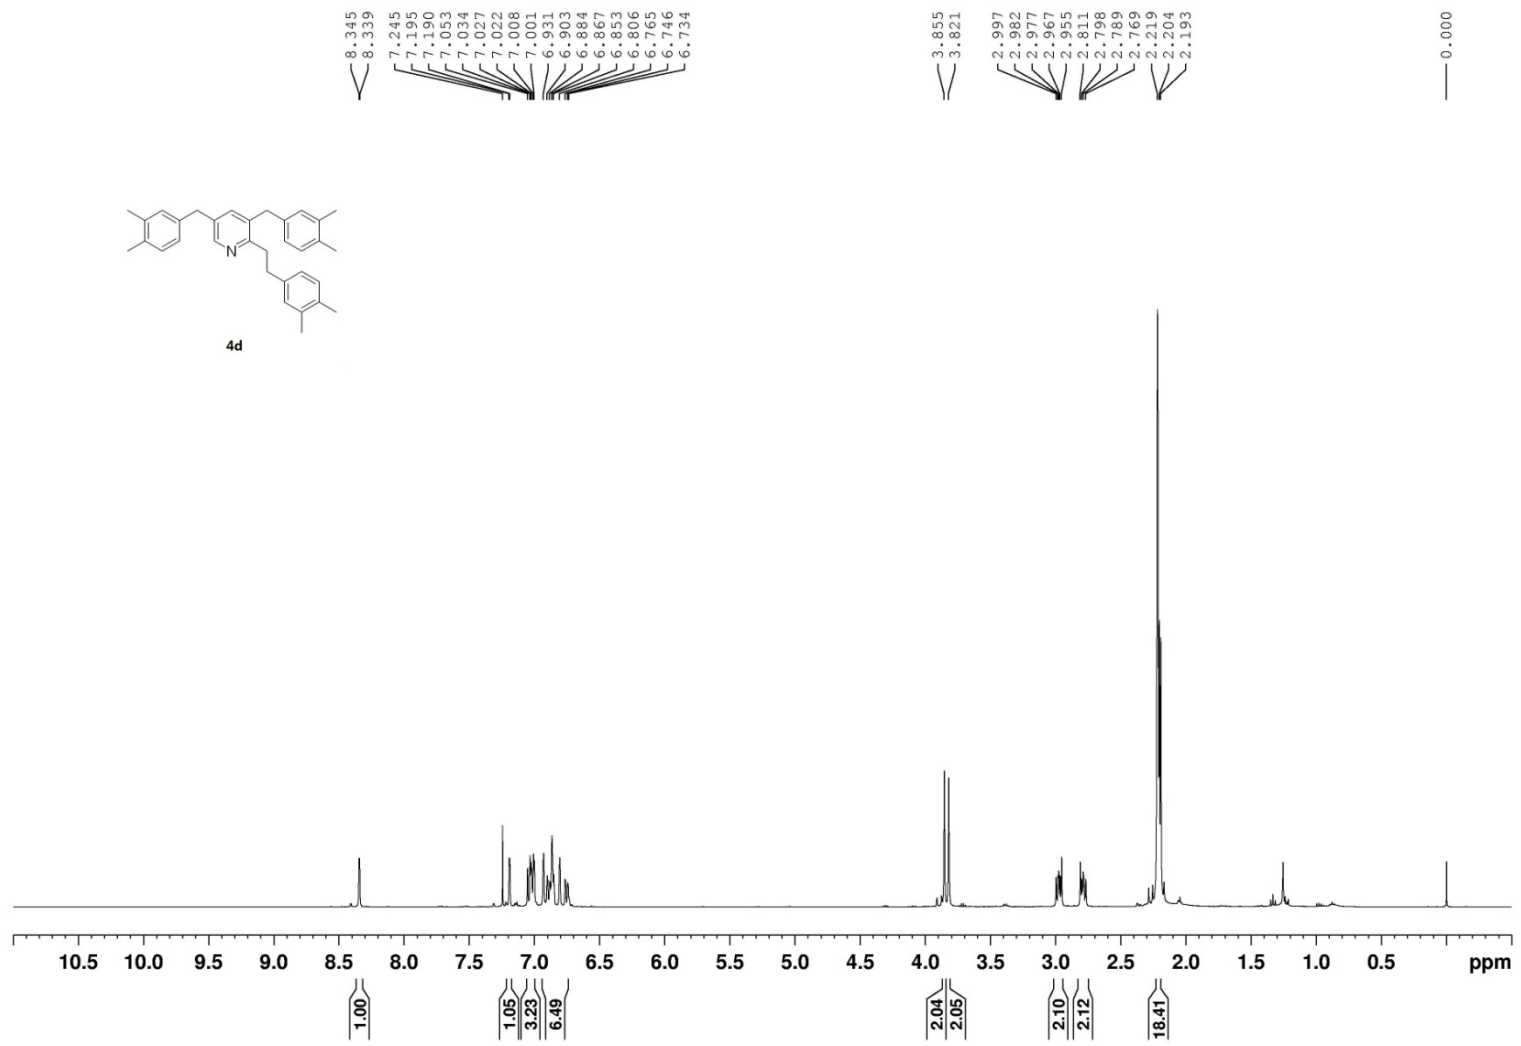

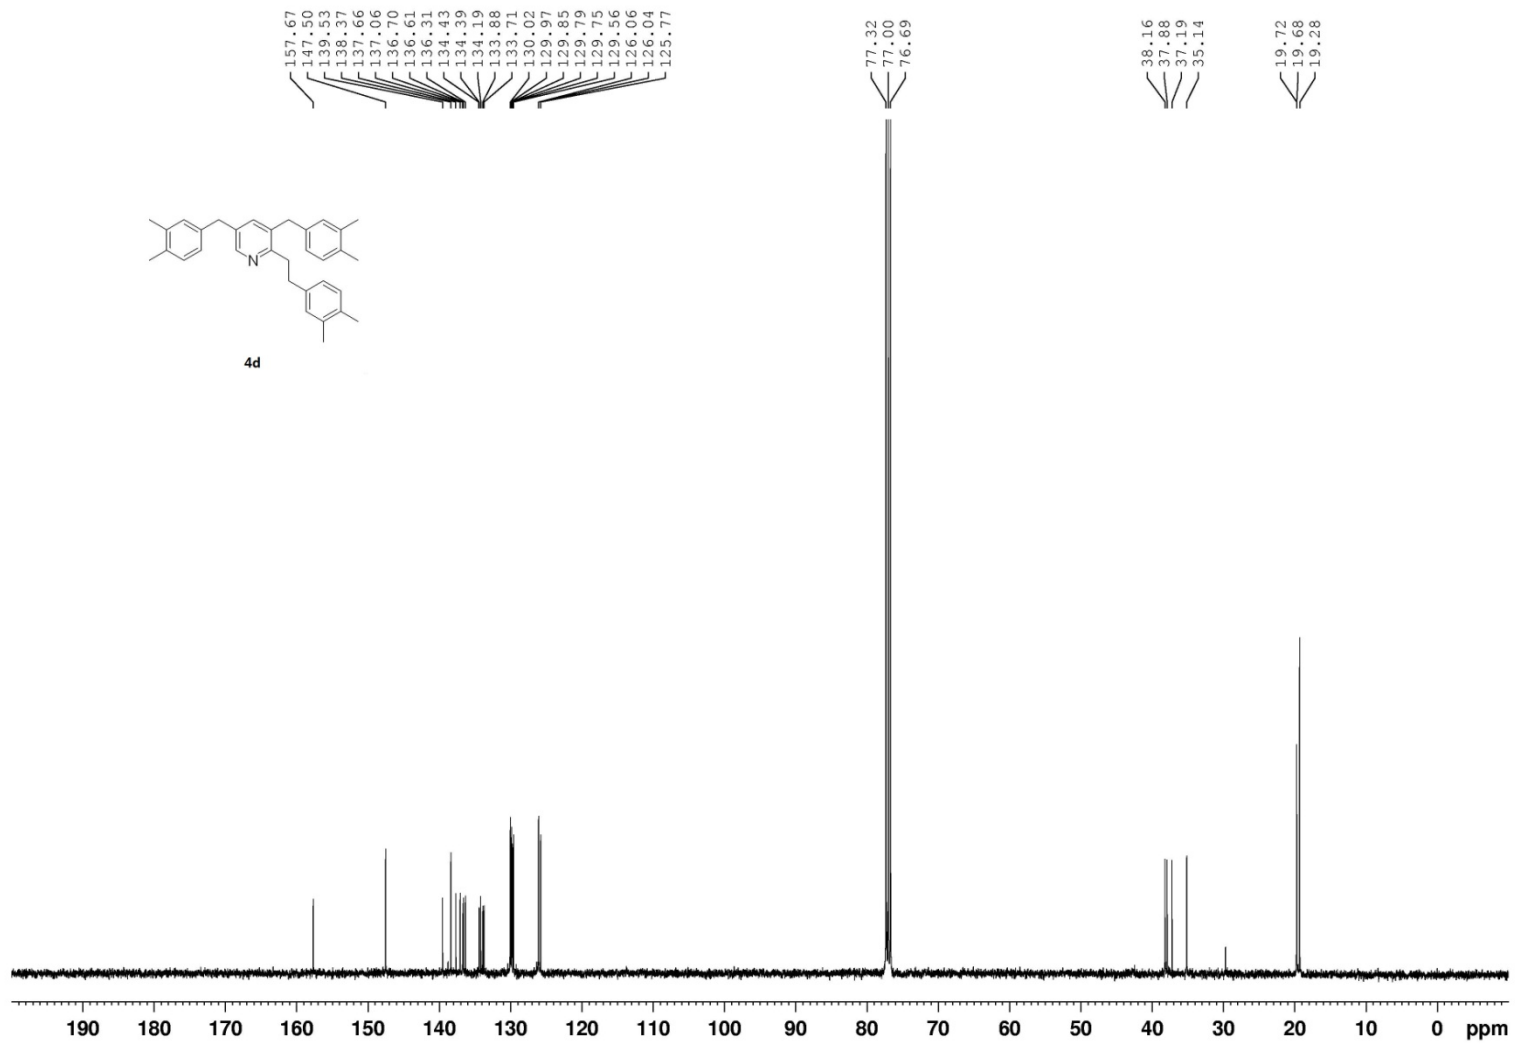

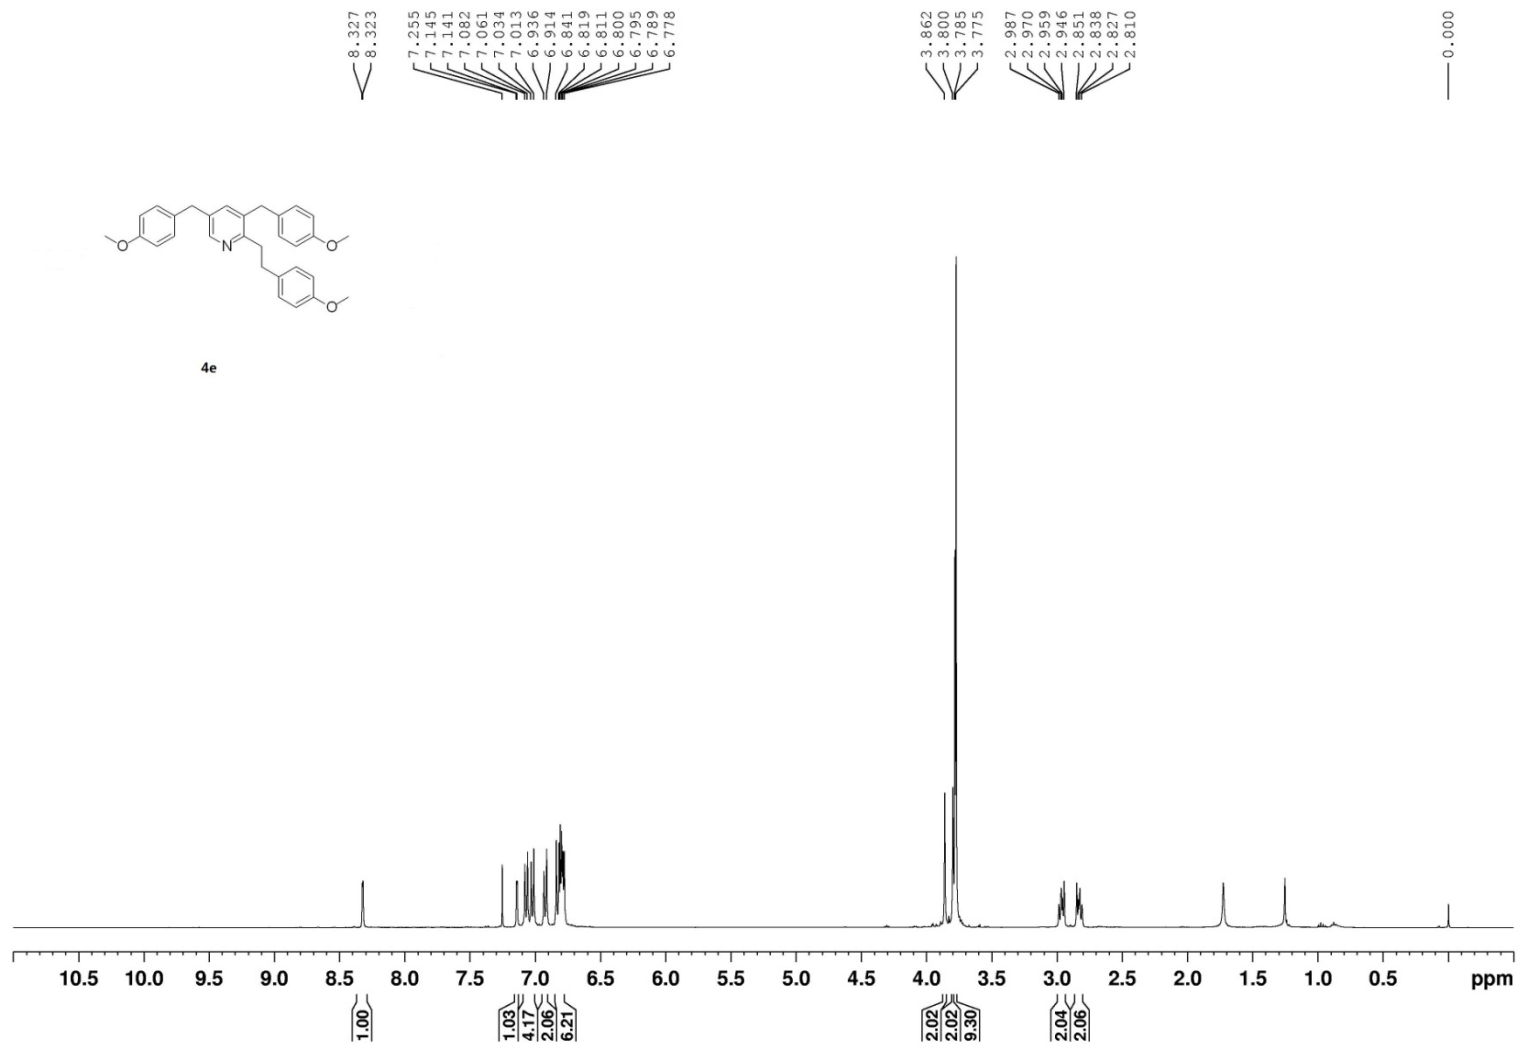

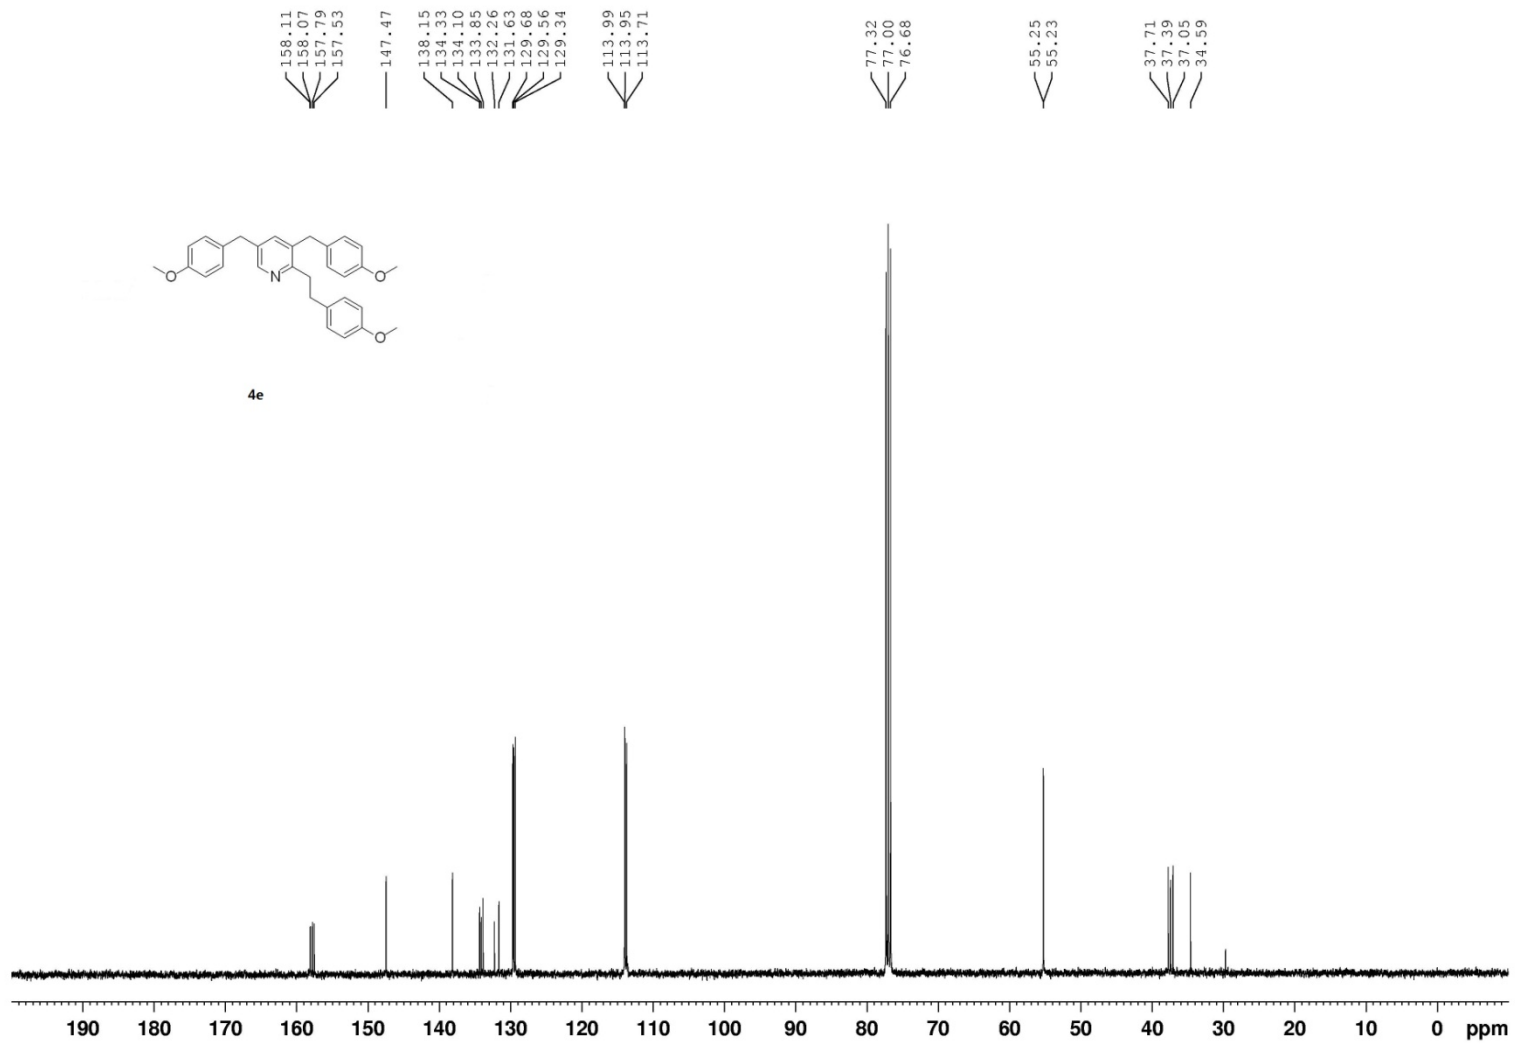

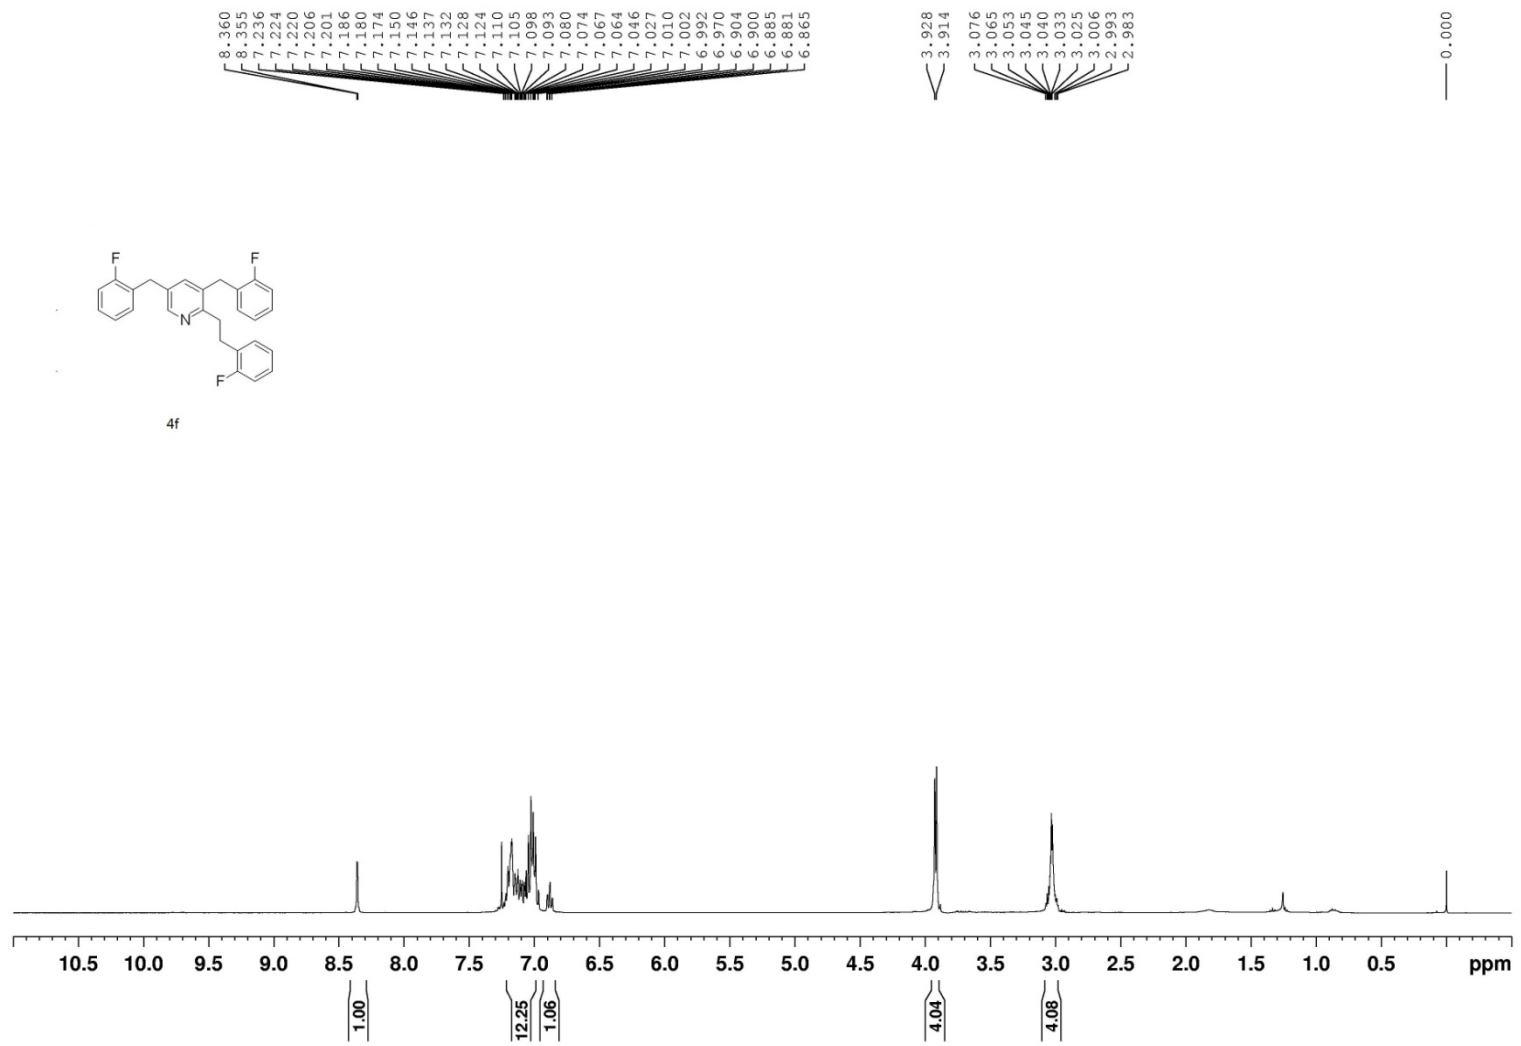

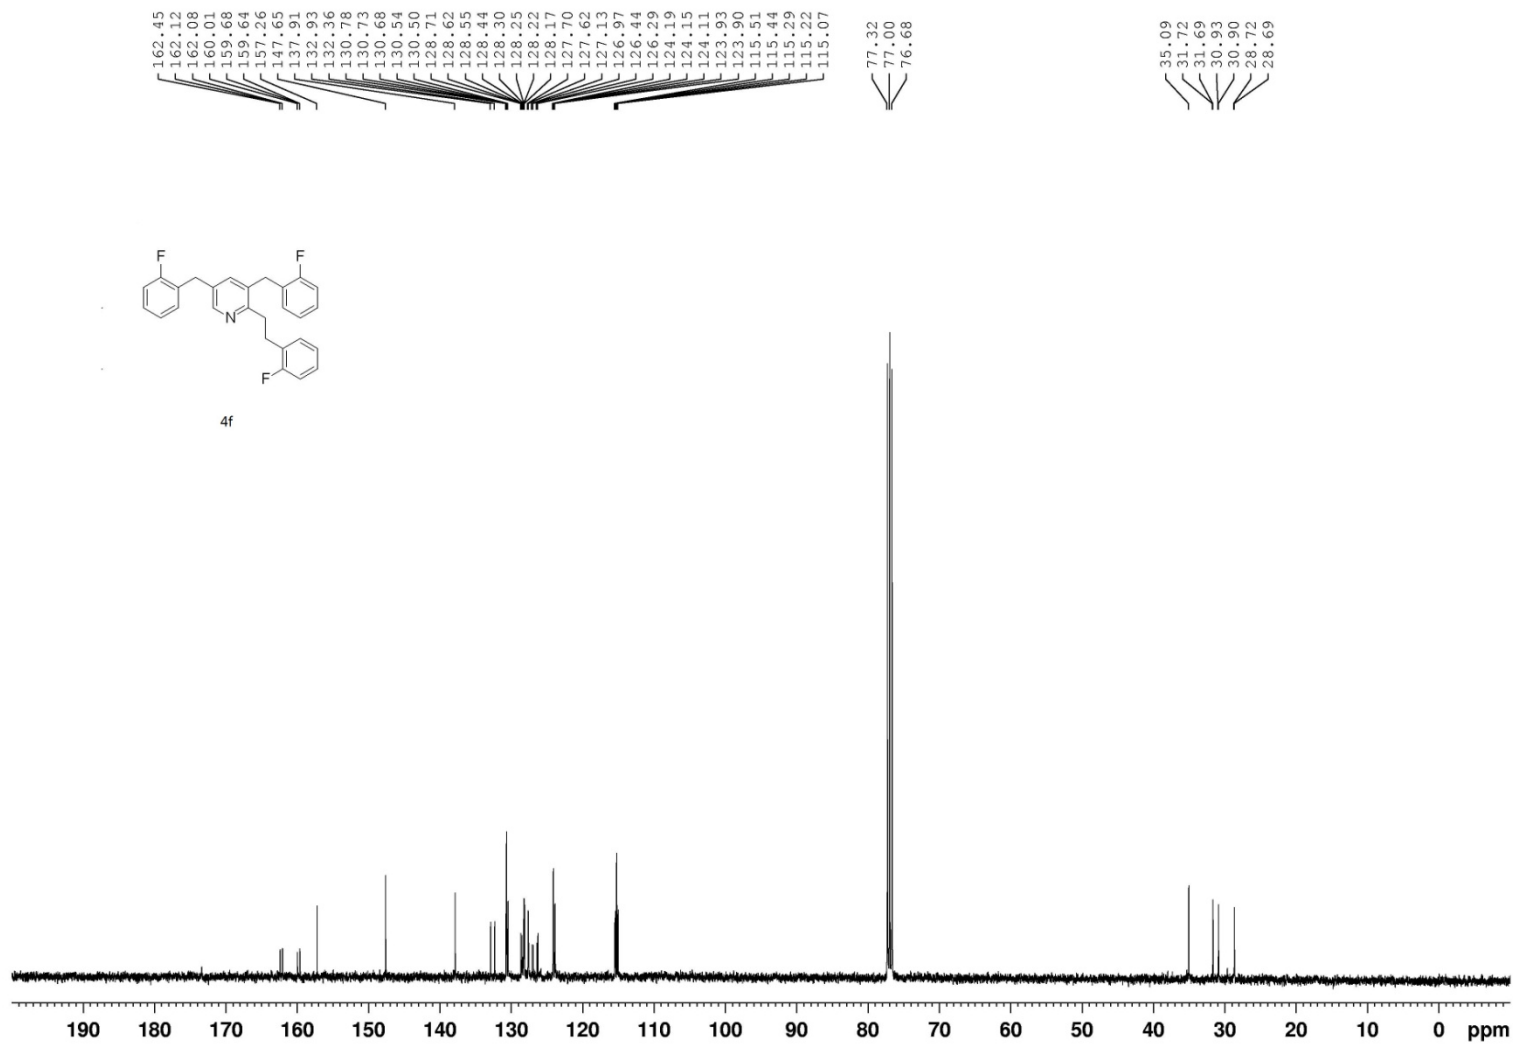

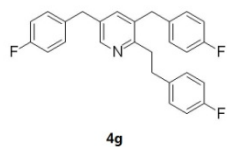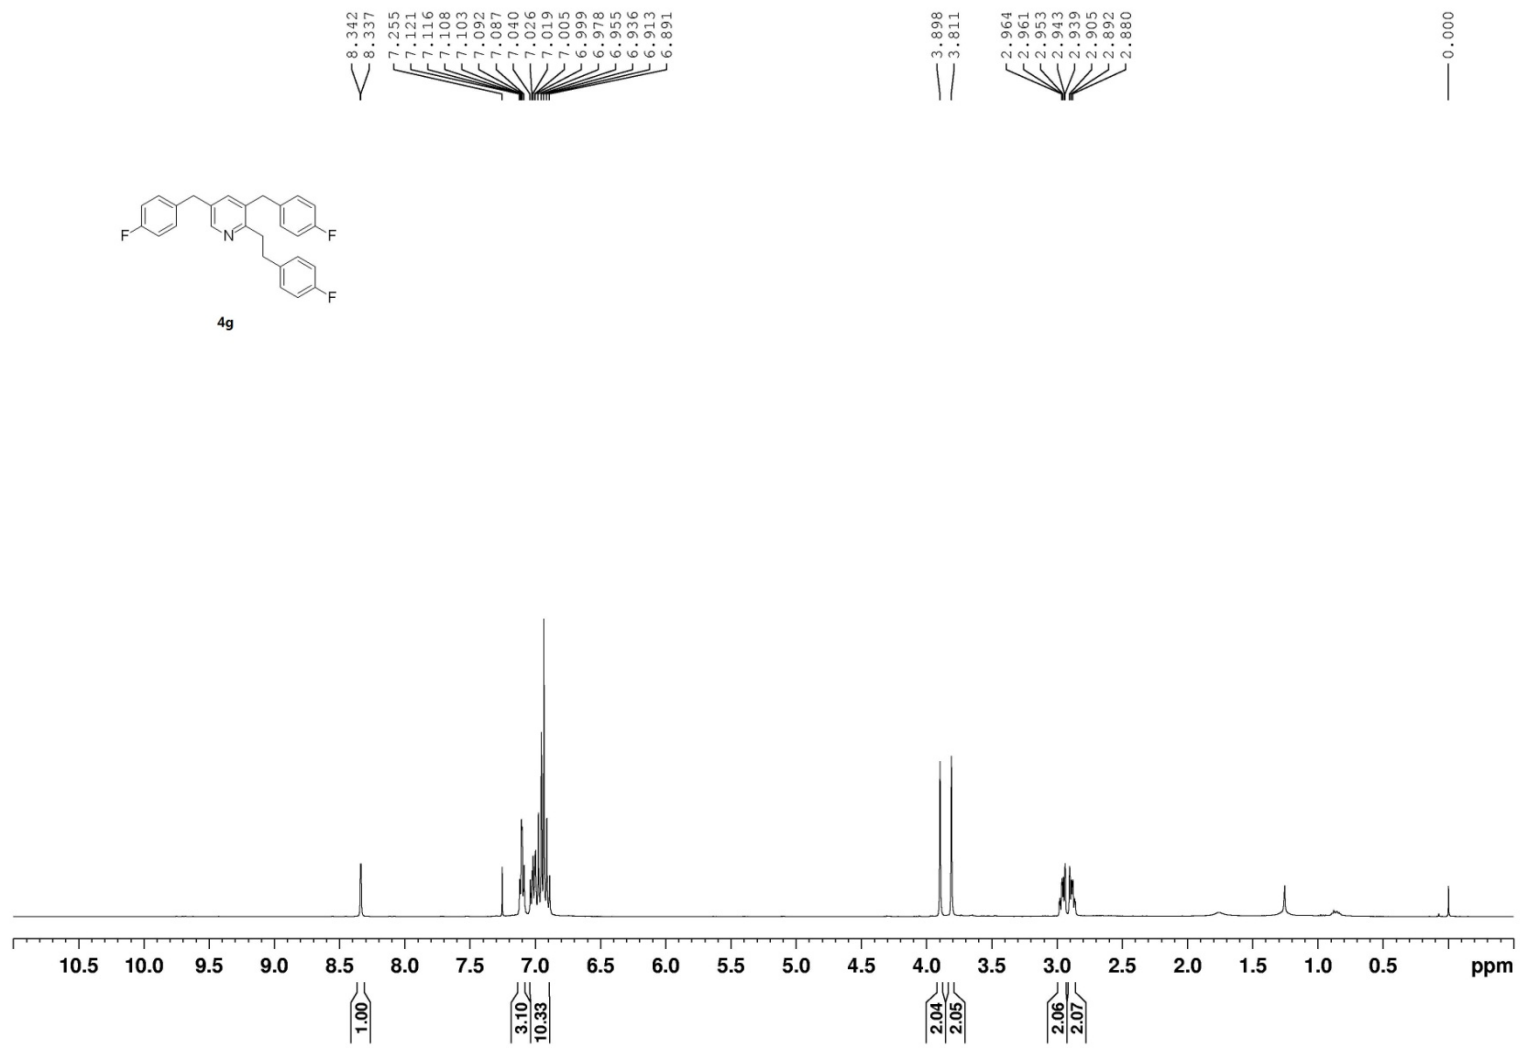

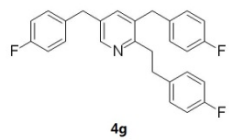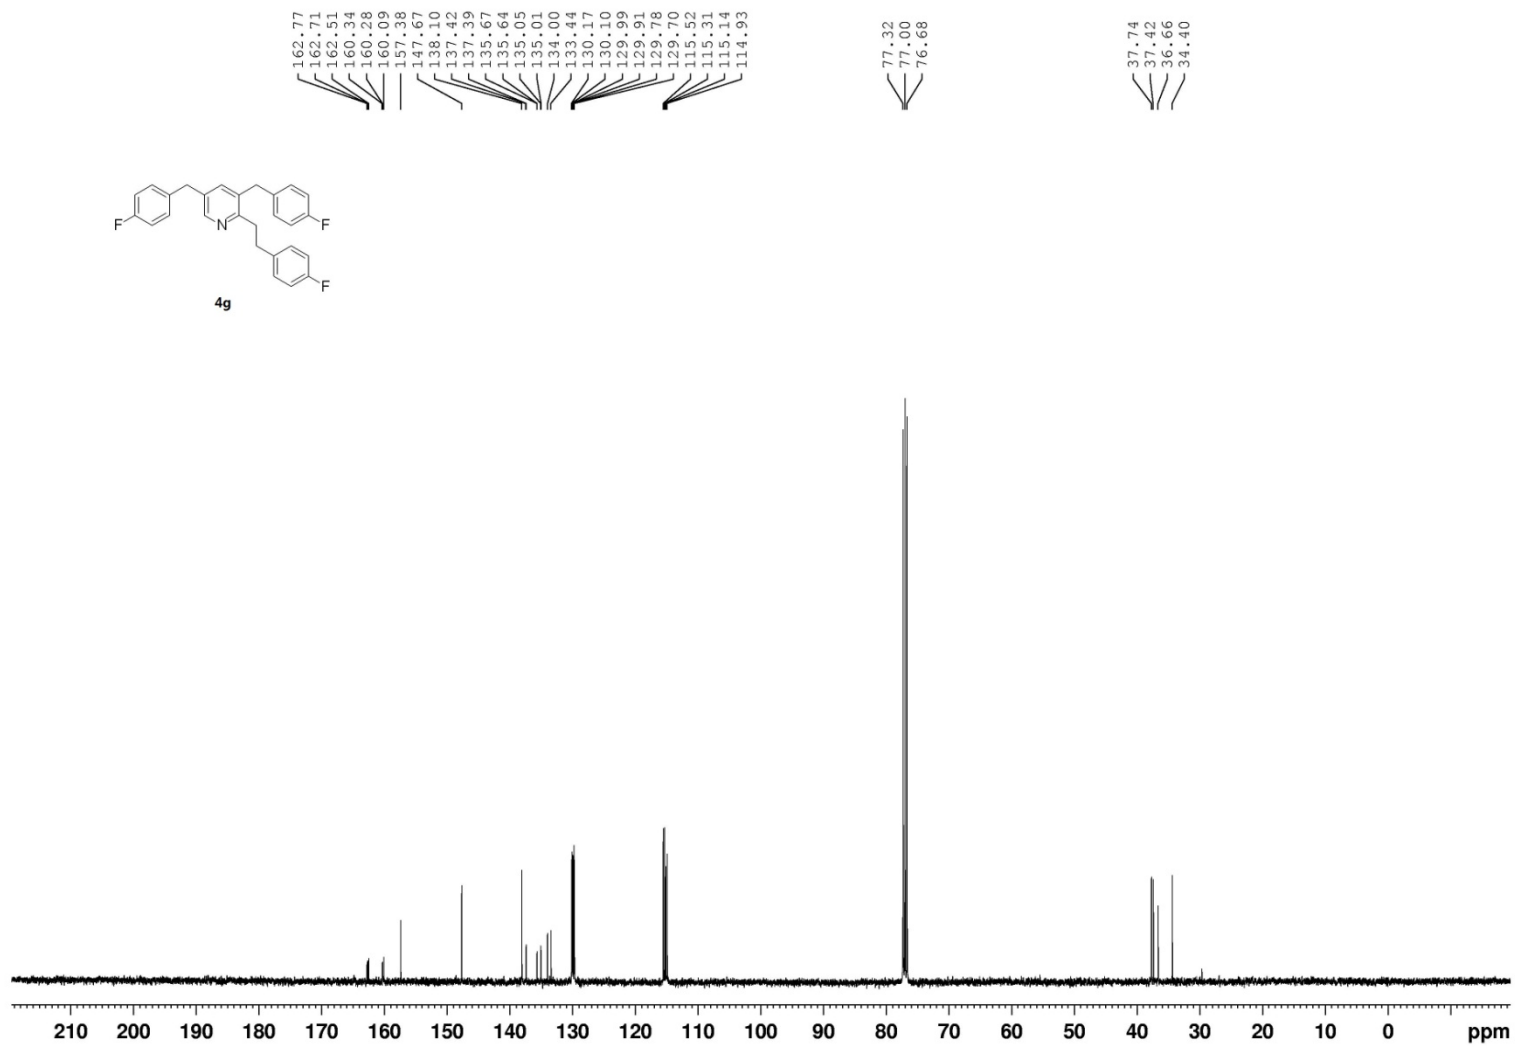

Supplement: c4ra10880a1.pdf [file c4ra10880a1.pdf]
